# Supplementary material
Source: publisher figshare collection journal article supplement (https://wiley.figshare.com/ndownloader/files/16691738)
Supplement: Supplementary file 1 [file 16691738]

## Sheet: seasonal_plumage_colours_data
TipLabel	Scientific_name	English_name	BLFamilyLatin	male_seasonal_colour	female_seasonal_colour	mating_system	paternal_care	sexual_dichromatism	log_mass	percent_ground_forage	percent_tree_cover	precipitation_seasonality	temperature_seasonality	migration	research_effort
Acanthisitta_chloris	Acanthisitta chloris	Rifleman	Acanthisittidae	0	0	0	1	26.2289	0.841985	20	63	0.137978	0.00513091	0	2
Xenicus_gilviventris	Xenicus gilviventris	South Island Wren	Acanthisittidae	0	0	0	1	42.9877	1.24797	50	63	0.117533	0.00564913	0	1
Acanthiza_apicalis	Acanthiza apicalis	Inland Thornbill	Acanthizidae	0	0	0	1	18.178	0.875061	40	5	0.369776	0.00888281	0	1
Acanthiza_chrysorrhoa	Acanthiza chrysorrhoa	Yellow-rumped Thornbill	Acanthizidae	0	0	0	1	15.1916	0.961948	80	5	0.347767	0.00858383	0	2
Acanthiza_ewingii	Acanthiza ewingii	Tasmanian Thornbill	Acanthizidae	0	0	0	1	12.9521	0.838849	0	77	0.169333	0.00418656	0	1
Acanthiza_inornata	Acanthiza inornata	Western Thornbill	Acanthizidae	0	0	0	1	20.7103	0.845098	20	5	0.397625	0.006977	0	1
Acanthiza_iredalei	Acanthiza iredalei	Slender-billed Thornbill	Acanthizidae	0	0	0	1	16.0734	0.781755	50	5	0.299613	0.00685074	0	1
Acanthiza_katherina	Acanthiza katherina	Mountain Thornbill	Acanthizidae	0	0	0	1	12.864	0.857332	0	30	0.651237	0.00405946	0	1
Acanthiza_lineata	Acanthiza lineata	Striated Thornbill	Acanthizidae	0	0	0	1	19.8736	0.836748	0	28	0.272761	0.0068801	0	2
Acanthiza_murina	Acanthiza murina	Papuan Thornbill	Acanthizidae	0	0	0	1	14.5336	0.924279	0	63.5	0.146589	0.000554368	0	0
Acanthiza_nana	Acanthiza nana	Yellow Thornbill	Acanthizidae	0	0	0	1	10.3662	0.792392	0	16	0.312298	0.00755146	0	1
Acanthiza_pusilla	Acanthiza pusilla	Brown Thornbill	Acanthizidae	0	0	0	1	14.4408	0.886491	40	32	0.27685	0.00646225	0	2
Acanthiza_reguloides	Acanthiza reguloides	Buff-rumped Thornbill	Acanthizidae	0	0	0	1	11.255	0.886491	30	17	0.314124	0.00740231	0	2
Acanthiza_robustirostris	Acanthiza robustirostris	Slaty-backed Thornbill	Acanthizidae	0	0	0	1	10.6401	0.78533	20	5	0.429019	0.00945238	0	1
Acanthiza_uropygialis	Acanthiza uropygialis	Chestnut-rumped Thornbill	Acanthizidae	0	0	0	1	10.1214	0.80618	20	5	0.357794	0.00912786	0	1
Acanthornis_magna	Acanthornis magna	Scrubtit	Acanthizidae	0	0	0	1	15.0479	1.0086	40	78	0.177527	0.00419668	0	0
Aphelocephala_leucopsis	Aphelocephala leucopsis	Southern Whiteface	Acanthizidae	0	0	0	1	8.41312	1.09846	80	5	0.337616	0.00923185	0	1
Aphelocephala_nigricincta	Aphelocephala nigricincta	Banded Whiteface	Acanthizidae	0	0	0	1	19.1287	1.01703	80	5	0.429943	0.00957547	0	0
Aphelocephala_pectoralis	Aphelocephala pectoralis	Chestnut-breasted Whiteface	Acanthizidae	0	0	0	1	16.1035	0.954243	100	2	0.324693	0.0100465	0	1
Calamanthus_campestris	Calamanthus campestris	Rufous Fieldwren	Acanthizidae	0	0	0	1	14.1444	1.14161	80	5	0.328124	0.00825208	0	1
Calamanthus_fuliginosus	Calamanthus fuliginosus	Striated Fieldwren	Acanthizidae	0	0	0	1	28.2101	1.31945	50	62.5	0.178888	0.00516556	0	1
Chthonicola_sagittatus	Chthonicola sagittatus	Speckled Warbler	Acanthizidae	0	0	0	1	38.0636	1.12385	80	28	0.299263	0.00703522	0	1
Crateroscelis_murina	Crateroscelis murina	Rusty Mouse-warbler	Acanthizidae	0	0	NA	1	38.738	1.17609	60	76	0.156484	0.000640141	0	0
Crateroscelis_nigrorufa	Crateroscelis nigrorufa	Bicoloured Mouse-warbler	Acanthizidae	0	0	NA	1	11.9508	1.19728	50	70	0.153637	0.000567115	0	1
Crateroscelis_robusta	Crateroscelis robusta	Mountain Mouse-warbler	Acanthizidae	0	0	NA	1	14.4001	1.26951	50	75	0.159482	0.000531888	0	1
Gerygone_albofrontata	Gerygone albofrontata	Chatham Gerygone	Acanthizidae	0	0	0	1	28.6056	1.01284	0	0	0.144879	0.00345326	0	1
Gerygone_chloronota	Gerygone chloronota	Green-backed Gerygone	Acanthizidae	0	0	0	1	11.1605	0.819544	0	62.5	0.201695	0.000808643	0	0
Gerygone_chrysogaster	Gerygone chrysogaster	Yellow-bellied Gerygone	Acanthizidae	0	0	0	1	19.0334	0.90309	0	76	0.172833	0.00078153	0	0
Gerygone_cinerea	Gerygone cinerea	Mountain Gerygone	Acanthizidae	0	0	NA	1	9.2216	0.880814	0	65	0.148748	0.000564814	0	0
Gerygone_dorsalis	Gerygone dorsalis	Rufous-sided Gerygone	Acanthizidae	0	0	NA	1	8.07841	0.857332	0	0	0.471867	0.00102011	0	0
Gerygone_flavolateralis	Gerygone flavolateralis	Fan-tailed Gerygone	Acanthizidae	0	0	NA	1	16.4641	0.799341	0	1	0.270257	0.00311104	0	1
Gerygone_fusca	Gerygone fusca	Western Gerygone	Acanthizidae	0	0	0	1	15.7349	0.732394	10	6	0.462502	0.0081492	1	1
Gerygone_hypoxantha	Gerygone hypoxantha	Biak Gerygone	Acanthizidae	0	0	NA	1	14.414	0.857332	0	0	0.133721	0.000342347	0	NA
Gerygone_igata	Gerygone igata	Grey Gerygone	Acanthizidae	0	0	0	1	11.1073	0.80618	0	48	0.140351	0.00512072	0	2
Gerygone_inornata	Gerygone inornata	Plain Gerygone	Acanthizidae	0	0	NA	1	7.77183	0.857332	0	33	0.552155	0.00129845	0	0
Gerygone_levigaster	Gerygone levigaster	Mangrove Gerygone	Acanthizidae	0	0	0	1	9.87098	0.792392	10	26	0.431119	0.00321697	0	1
Gerygone_magnirostris	Gerygone magnirostris	Large-billed Gerygone	Acanthizidae	0	0	0	1	12.7235	0.832509	50	61	0.241458	0.0010237	0	1
Gerygone_modesta	Gerygone modesta	Norfolk Island Gerygone	Acanthizidae	0	0	0	1	11.7633	0.875061	0	0	0.182952	0.00442695	0	0
Gerygone_mouki	Gerygone mouki	Brown Gerygone	Acanthizidae	0	0	0	1	11.9608	0.716003	0	43	0.329071	0.00582693	0	1
Gerygone_olivacea	Gerygone olivacea	White-throated Gerygone	Acanthizidae	0	0	0	1	8.18469	0.821867	10	23	0.558752	0.00483805	0	1
Gerygone_palpebrosa	Gerygone palpebrosa	Fairy Gerygone	Acanthizidae	0	0	0	1	107.768	0.869232	0	70	0.170721	0.000829094	0	1
Gerygone_ruficollis	Gerygone ruficollis	Brown-breasted Gerygone	Acanthizidae	0	0	NA	1	13.7078	0.845098	0	72	0.152796	0.000511944	0	0
Gerygone_sulphurea	Gerygone sulphurea	Golden-bellied Gerygone	Acanthizidae	0	0	0	1	13.0284	0.748188	0	25	0.258868	0.000679435	0	1
Gerygone_tenebrosa	Gerygone tenebrosa	Dusky Gerygone	Acanthizidae	0	0	0	1	9.79956	0.886491	0	5	0.652963	0.00561452	0	0
Hylacola_cauta	Hylacola cauta	Shy Heathwren	Acanthizidae	0	0	0	1	36.1093	1.18279	50	6.5	0.306828	0.00781046	0	1
Hylacola_pyrrhopygia	Hylacola pyrrhopygia	Chestnut-rumped Heathwren	Acanthizidae	0	0	0	1	21.9896	1.22531	50	30	0.240884	0.00704338	0	1
Mohoua_albicilla	Mohoua albicilla	Whitehead	Acanthizidae	0	0	0	1	11.3313	1.24674	20	63.5	0.146749	0.00502454	0	2
Mohoua_novaeseelandiae	Mohoua novaeseelandiae	Pipipi	Acanthizidae	0	0	0	1	10.16	1.08636	0	46	0.116865	0.00502155	0	1
Mohoua_ochrocephala	Mohoua ochrocephala	Yellowhead	Acanthizidae	0	0	0	1	16.5395	1.44326	0	68	0.115577	0.00508392	0	2
Oreoscopus_gutturalis	Oreoscopus gutturalis	Fernwren	Acanthizidae	0	0	0	1	9.80057	1.30103	100	40	0.565139	0.00369622	0	1
Origma_solitaria	Origma solitaria	Rockwarbler	Acanthizidae	0	0	0	1	19.704	1.15685	80	34	0.225664	0.00678811	0	1
Pycnoptilus_floccosus	Pycnoptilus floccosus	Pilotbird	Acanthizidae	0	0	0	1	14.2526	1.4624	100	58	0.212859	0.00686441	0	1
Pyrrholaemus_brunneus	Pyrrholaemus brunneus	Redthroat	Acanthizidae	0	0	0	1	41.4509	1.09691	50	5	0.384317	0.0091822	0	1
Sericornis_arfakianus	Sericornis arfakianus	Grey-green Scrubwren	Acanthizidae	0	0	NA	1	9.36297	0.939519	0	75	0.146589	0.000503195	0	0
Sericornis_beccarii	Sericornis beccarii	Beccari's Scrubwren	Acanthizidae	0	0	NA	1	11.2382	1.08144	0	73	0.260407	0.00080797	0	1
Sericornis_citreogularis	Sericornis citreogularis	Yellow-throated Scrubwren	Acanthizidae	0	0	0	1	29.596	1.23605	80	41	0.319264	0.00610837	0	1
Sericornis_frontalis	Sericornis frontalis	White-browed Scrubwren	Acanthizidae	0	0	0	1	37.8185	1.10804	50	21	0.296924	0.00663384	0	3
Sericornis_humilis	Sericornis humilis	Tasmanian Scrubwren	Acanthizidae	0	0	0	1	26.7301	1.26245	40	74.5	0.169203	0.00419668	0	0
Sericornis_keri	Sericornis keri	Atherton Scrubwren	Acanthizidae	0	0	0	1	11.8671	1.0569	70	76	0.509641	0.00399256	0	1
Sericornis_magnirostra	Sericornis magnirostra	Large-billed Scrubwren	Acanthizidae	0	0	0	1	3.94637	0.991226	0	49	0.310539	0.00564402	0	0
Sericornis_nouhuysi	Sericornis nouhuysi	Large Scrubwren	Acanthizidae	0	0	NA	1	14.522	1.233	0	67.5	0.154238	0.000535164	0	1
Sericornis_papuensis	Sericornis papuensis	Papuan Scrubwren	Acanthizidae	0	0	NA	1	20.829	1.04922	0	73	0.146048	0.000527384	0	1
Sericornis_perspicillatus	Sericornis perspicillatus	Buff-faced Scrubwren	Acanthizidae	0	0	0	1	6.86037	0.954243	0	65	0.147686	0.000508851	0	1
Sericornis_rufescens	Sericornis rufescens	Vogelkop Scrubwren	Acanthizidae	0	0	NA	1	18.6102	1.07918	0	79.5	0.172194	0.000487123	0	0
Sericornis_spilodera	Sericornis spilodera	Pale-billed Scrubwren	Acanthizidae	0	0	NA	1	20.5142	1.06819	0	77	0.151664	0.000571157	0	1
Sericornis_virgatus	Sericornis virgatus	Perplexing Scrubwren	Acanthizidae	0	0	NA	1	15.879	1.09342	0	77.5	0.133632	0.00042059	0	0
Smicrornis_brevirostris	Smicrornis brevirostris	Weebill	Acanthizidae	0	0	0	1	7.83556	0.724276	10	5	0.41369	0.00795648	0	1
Aegithalos_caudatus	Aegithalos caudatus	Long-tailed Tit	Aegithalidae	0	0	0	1	9.29538	0.934498	10	5	0.543122	0.0151916	0	3
Aegithalos_concinnus	Aegithalos concinnus	Black-throated Tit	Aegithalidae	0	0	0	1	10.3243	0.78533	0	22	0.462403	0.0107432	0	2
Aegithalos_fuliginosus	Aegithalos fuliginosus	White-necklaced Tit	Aegithalidae	0	0	NA	1	21.6761	0.778151	0	25	0.543558	0.0129146	0	1
Aegithalos_iouschistos	Aegithalos iouschistos	Black-browed Tit	Aegithalidae	0	0	0	1	25.5756	0.845098	0	5	0.532	0.00976642	0	1
Aegithalos_leucogenys	Aegithalos leucogenys	White-cheeked Tit	Aegithalidae	0	0	0	1	15.3159	0.829304	0	5	0.517951	0.0142048	1	1
Aegithalos_niveogularis	Aegithalos niveogularis	White-throated Tit	Aegithalidae	0	0	0	1	15.7403	0.892095	0	5	0.412443	0.0121994	0	1
Leptopoecile_elegans	Leptopoecile elegans	Crested Tit-warbler	Aegithalidae	0	0	NA	1	119.821	0.79588	0	12	0.564231	0.0116746	0	0
Leptopoecile_sophiae	Leptopoecile sophiae	White-browed Tit-warbler	Aegithalidae	0	0	0	1	62.1858	0.838849	0	5	0.464032	0.0139364	1	2
Psaltria_exilis	Psaltria exilis	Pygmy Tit	Aegithalidae	0	0	0	1	16.8573	0.763428	0	8	0.346683	0.00055166	0	0
Psaltriparus_minimus	Psaltriparus minimus	Bushtit	Aegithalidae	0	0	0	1	26.3569	0.724276	0	9	0.384556	0.0114137	0	2
Aegithina_lafresnayei	Aegithina lafresnayei	Great Iora	Aegithinidae	0	0	NA	1	28.6318	1.07773	0	31	0.627788	0.00228547	0	1
Aegithina_nigrolutea	Aegithina nigrolutea	White-tailed Iora	Aegithinidae	1	0	0	1	95.1053	1.07918	0	10	0.764728	0.00748595	0	1
Aegithina_tiphia	Aegithina tiphia	Common Iora	Aegithinidae	1	0	0	1	85.0504	1.07918	0	21.5	0.653867	0.00364253	0	1
Aegithina_viridissima	Aegithina viridissima	Green Iora	Aegithinidae	0	0	0	1	56.5096	1.1271	0	61	0.16988	0.000556039	0	1
Alaemon_alaudipes	Alaemon alaudipes	Greater Hoopoe-lark	Alaudidae	0	0	0	1	20.9612	1.64197	100	0	0.368198	0.0106222	0	2
Alaemon_hamertoni	Alaemon hamertoni	Lesser Hoopoe-lark	Alaudidae	0	0	0	1	37.5827	1.54407	100	0	0.512689	0.00218285	0	0
Alauda_arvensis	Alauda arvensis	Eurasian Skylark	Alaudidae	0	0	0	1	35.8109	1.58595	100	10	0.255204	0.0196823	1	3
Alauda_gulgula	Alauda gulgula	Oriental Skylark	Alaudidae	0	0	0	1	23.4594	1.41996	100	8	0.563518	0.00980239	1	2
Alauda_japonica	Alauda japonica	Japanese Skylark	Alaudidae	0	0	NA	NA	NA	1.50174	100	NA	NA	NA	NA	1
Alauda_razae	Alauda razae	Raso Lark	Alaudidae	0	0	0	1	25.5019	1.34242	100	2.5	0.67058	NA	0	1
Ammomanes_cinctura	Ammomanes cinctura	Bar-tailed Lark	Alaudidae	0	0	0	1	13.3447	1.273	100	0	0.312836	0.0111795	0	1
Ammomanes_deserti	Ammomanes deserti	Desert Lark	Alaudidae	0	0	0	1	26.1936	1.37658	100	0	0.380541	0.0103361	0	2
Ammomanes_grayi	Ammomanes grayi	Gray's Lark	Alaudidae	0	0	0	1	8.63602	1.33143	100	0	0.48565	0.00337195	0	0
Ammomanes_phoenicura	Ammomanes phoenicura	Rufous-tailed Lark	Alaudidae	0	0	0	1	25.6112	1.40824	100	11	0.753644	0.00589824	0	0
Calandrella_acutirostris	Calandrella acutirostris	Hume's Lark	Alaudidae	0	0	0	1	19.526	1.30643	100	5	0.511188	0.0137603	1	1
Calandrella_brachydactyla	Calandrella brachydactyla	Greater Short-toed Lark	Alaudidae	0	0	0	1	31.3669	1.31667	100	5	0.388546	0.0154056	1	3
Calandrella_cheleensis	Calandrella cheleensis	Asian Short-toed Lark	Alaudidae	0	0	NA	NA	NA	1.34635	100	NA	NA	NA	NA	1
Calandrella_cinerea	Calandrella cinerea	Red-capped Lark	Alaudidae	0	0	0	1	17.8347	1.37475	100	23	0.725125	0.0036159	0	3
Calandrella_raytal	Calandrella raytal	Indian Short-toed Lark	Alaudidae	0	0	0	1	13.6166	1.26717	100	7	0.603288	0.00851458	0	1
Calandrella_rufescens	Calandrella rufescens	Lesser Short-toed Lark	Alaudidae	0	0	0	1	21.121	1.38202	100	5	0.469689	0.0157834	1	3
Calandrella_somalica	Calandrella somalica	Rufous Short-toed Lark	Alaudidae	0	0	0	1	34.3982	1.34242	100	7	0.477862	0.00182425	0	1
Certhilauda_albescens	Certhilauda albescens	Karoo Lark	Alaudidae	0	0	0	1	19.039	1.48287	70	5	0.291627	0.00654694	0	1
Certhilauda_barlowi	Certhilauda barlowi	Barlow's Lark	Alaudidae	0	0	0	1	27.7756	1.47349	100	0	0.271754	0.00503447	0	1
Certhilauda_burra	Certhilauda burra	Red Lark	Alaudidae	0	0	0	1	22.8608	1.57403	80	5	0.421785	0.00910379	0	1
Certhilauda_chuana	Certhilauda chuana	Short-clawed Lark	Alaudidae	0	0	0	1	28.1088	1.64444	100	5	0.64702	0.00709367	0	1
Certhilauda_curvirostris	Certhilauda curvirostris	Cape Long-billed Lark	Alaudidae	0	0	0	1	31.2954	1.62221	80	5	0.353803	0.00561178	0	1
Certhilauda_erythrochlamys	Certhilauda erythrochlamys	Dune Lark	Alaudidae	0	0	0	1	9.15841	1.44871	100	0	0.455891	0.00404159	0	1
Certhilauda_semitorquata	Certhilauda semitorquata	Eastern Long-billed Lark	Alaudidae	0	0	0	1	18.6554	1.59106	80	6	0.547403	0.00671663	0	1
Certhilauda_subcoronata	Certhilauda subcoronata	Karoo Long-billed Lark	Alaudidae	0	0	0	1	37.8008	1.60206	80	5	0.514549	0.00804951	0	1
Chersomanes_albofasciata	Chersomanes albofasciata	Spike-heeled Lark	Alaudidae	0	0	0	1	17.9322	1.3927	100	5	0.611567	0.00695752	0	1
Chersophilus_duponti	Chersophilus duponti	Dupont's Lark	Alaudidae	0	0	0	1	19.6898	1.5955	100	2	0.339363	0.01063	0	3
Eremalauda_dunni	Eremalauda dunni	Dunn's Lark	Alaudidae	0	0	0	1	23.7961	1.31175	80	0	0.71411	0.00603401	0	2
Eremalauda_starki	Eremalauda starki	Stark's Lark	Alaudidae	0	0	0	1	14.1229	1.26717	100	5	0.598876	0.00714277	0	1
Eremophila_alpestris	Eremophila alpestris	Horned Lark	Alaudidae	0	0	0	1	42.4769	1.52759	100	5	0.305289	0.0161745	1	3
Eremophila_bilopha	Eremophila bilopha	Temminck's Lark	Alaudidae	0	0	0	1	34.369	1.58546	100	0	0.303386	0.0112994	0	1
Eremopterix_australis	Eremopterix australis	Black-eared Sparrow-lark	Alaudidae	0	0	0	1	210.687	1.15229	80	5	0.421785	0.00823218	0	1
Eremopterix_griseus	Eremopterix griseus	Ashy-crowned Sparrow-lark	Alaudidae	0	0	0	1	184.294	1.20412	100	9	0.728112	0.00619469	1	0
Eremopterix_leucopareia	Eremopterix leucopareia	Fischer's Sparrow-lark	Alaudidae	0	0	0	1	116.631	1.16137	100	24	0.574985	0.00183877	0	1
Eremopterix_leucotis	Eremopterix leucotis	Chestnut-backed Sparrow-lark	Alaudidae	0	0	0	1	203.424	1.21484	100	12	0.819774	0.00335012	0	1
Eremopterix_nigriceps	Eremopterix nigriceps	Black-crowned Sparrow-lark	Alaudidae	0	0	0	1	218.532	1.14613	100	0	0.510601	0.00679434	0	2
Eremopterix_signatus	Eremopterix signatus	Chestnut-headed Sparrow-lark	Alaudidae	0	0	0	1	169.05	1.1959	100	5	0.520086	0.001671	0	0
Eremopterix_verticalis	Eremopterix verticalis	Grey-backed Sparrow-lark	Alaudidae	0	0	0	1	228.351	1.23045	100	5	0.700766	0.00635271	1	1
Galerida_cristata	Galerida cristata	Crested Lark	Alaudidae	0	0	0	1	22.3835	1.62108	100	5	0.429374	0.0120205	0	3
Galerida_deva	Galerida deva	Tawny Lark	Alaudidae	0	0	0	1	11.7577	1.30103	100	12	0.760738	0.00546234	0	1
Galerida_magnirostris	Galerida magnirostris	Large-billed Lark	Alaudidae	0	0	0	1	28.7262	1.61909	100	5	0.381472	0.0078234	0	1
Galerida_malabarica	Galerida malabarica	Malabar Lark	Alaudidae	0	0	0	1	15.0828	1.5563	100	22	0.950339	0.00194904	0	1
Galerida_modesta	Galerida modesta	Sun Lark	Alaudidae	0	0	0	1	22.4798	1.30535	100	17	0.886981	0.00279049	0	1
Galerida_theklae	Galerida theklae	Thekla Lark	Alaudidae	0	0	0	1	27.9912	1.58206	100	5	0.406112	0.00866249	0	2
Heteromirafra_archeri	Heteromirafra archeri	Archer's Lark	Alaudidae	0	0	0	1	19.8165	1.39794	100	0	0.47331	0.00357384	0	1
Heteromirafra_ruddi	Heteromirafra ruddi	Rudd's Lark	Alaudidae	0	0	0	1	19.5891	1.42488	40	9.5	0.527104	0.0060026	0	1
Heteromirafra_sidamoensis	Heteromirafra sidamoensis	Liben Lark	Alaudidae	0	0	NA	1	30.8379	1.48001	100	9	0.53585	0.00156791	0	1
Lullula_arborea	Lullula arborea	Wood Lark	Alaudidae	0	0	0	1	28.9349	1.42975	100	9	0.196866	0.0129027	1	3
Melanocorypha_bimaculata	Melanocorypha bimaculata	Bimaculated Lark	Alaudidae	0	0	0	1	23.9102	1.7332	100	5	0.409242	0.0159143	1	2
Melanocorypha_calandra	Melanocorypha calandra	Calandra Lark	Alaudidae	0	0	0	1	13.7662	1.78958	100	5	0.38566	0.01452	1	3
Melanocorypha_leucoptera	Melanocorypha leucoptera	White-winged Lark	Alaudidae	0	0	0	1	39.8844	1.6561	100	5	0.21101	0.0212879	1	2
Melanocorypha_maxima	Melanocorypha maxima	Tibetan Lark	Alaudidae	0	0	0	1	17.5678	1.87506	100	5	0.549744	0.0122324	0	1
Melanocorypha_mongolica	Melanocorypha mongolica	Mongolian Lark	Alaudidae	0	0	0	1	40.3983	1.734	100	5	0.500487	0.0213003	1	2
Melanocorypha_yeltoniensis	Melanocorypha yeltoniensis	Black Lark	Alaudidae	0	0	0	1	243.922	1.77851	100	5	0.202405	0.0214101	1	2
Mirafra_affinis	Mirafra affinis	Jerdon's Bushlark	Alaudidae	0	0	NA	1	19.7306	1.4183	100	12	0.680254	0.00373201	0	1
Mirafra_africana	Mirafra africana	Rufous-naped Lark	Alaudidae	0	0	0	1	36.1573	1.63771	80	21	0.747592	0.00313678	0	1
Mirafra_africanoides	Mirafra africanoides	Fawn-coloured Lark	Alaudidae	0	0	0	1	19.8785	1.36922	100	12	0.756762	0.00504309	0	1
Mirafra_albicauda	Mirafra albicauda	White-tailed Lark	Alaudidae	0	0	0	1	29.6792	1.34635	60	16	0.458627	0.00188333	0	1
Mirafra_alopex	Mirafra alopex	Abyssinian Lark	Alaudidae	0	0	NA	1	21.998	1.38021	100	6	0.501889	0.00180157	0	0
Mirafra_angolensis	Mirafra angolensis	Angola Lark	Alaudidae	0	0	0	1	25.3518	1.55991	100	49	0.937414	0.00143338	0	1
Mirafra_apiata	Mirafra apiata	Clapper Lark	Alaudidae	0	0	0	1	10.4327	1.43056	100	5	0.325158	0.00730594	0	1
Mirafra_ashi	Mirafra ashi	Ash's Lark	Alaudidae	0	0	NA	1	33.7052	1.56585	100	5	0.606563	0.00132546	0	1
Mirafra_assamica	Mirafra assamica	Rufous-winged Lark	Alaudidae	0	0	0	1	21.6138	1.4183	100	8	0.735795	0.0074947	0	1
Mirafra_cantillans	Mirafra cantillans	Singing Bushlark	Alaudidae	0	0	0	1	36.4627	1.27184	100	5	0.681102	0.00513057	0	1
Mirafra_cheniana	Mirafra cheniana	Melodious Lark	Alaudidae	0	0	0	1	23.6339	1.30103	100	6	0.629882	0.00661224	0	1
Mirafra_collaris	Mirafra collaris	Collared Lark	Alaudidae	0	0	0	1	20.4024	1.39794	100	5	0.575504	0.00162206	0	0
Mirafra_cordofanica	Mirafra cordofanica	Kordofan Lark	Alaudidae	0	0	NA	1	22.6031	1.46464	100	0	0.691872	0.00624969	0	1
Mirafra_erythrocephala	Mirafra erythrocephala	Indochinese Bushlark	Alaudidae	0	0	NA	1	37.6779	1.4183	100	22	0.65994	0.00240524	0	1
Mirafra_erythroptera	Mirafra erythroptera	Indian Lark	Alaudidae	0	0	0	1	49.467	1.32838	100	10	0.75856	0.00663363	0	1
Mirafra_gilletti	Mirafra gilletti	Gillett's Lark	Alaudidae	0	0	0	1	30.9751	1.35025	100	3	0.537641	0.00160497	0	1
Mirafra_hova	Mirafra hova	Madagascar Lark	Alaudidae	0	0	NA	1	24.8943	1.27646	60	13	0.613618	0.00321386	0	0
Mirafra_hypermetra	Mirafra hypermetra	Red-winged Lark	Alaudidae	0	0	0	1	27.6689	1.78817	100	10	0.470711	0.00179896	0	1
Mirafra_javanica	Mirafra javanica	Australasian Lark	Alaudidae	0	0	0	1	24.9678	1.36173	100	11	0.514057	0.00549883	0	2
Mirafra_microptera	Mirafra microptera	Burmese Bushlark	Alaudidae	0	0	NA	1	29.773	1.4183	100	18	0.809018	0.00431878	0	1
Mirafra_passerina	Mirafra passerina	Monotonous Lark	Alaudidae	0	0	0	1	19.1582	1.3927	100	8	0.764671	0.00526232	0	1
Mirafra_poecilosterna	Mirafra poecilosterna	Pink-breasted Lark	Alaudidae	0	0	0	1	17.5969	1.3927	100	6	0.51196	0.00177769	0	0
Mirafra_pulpa	Mirafra pulpa	Friedmann's Lark	Alaudidae	0	0	NA	1	23.6406	1.34044	100	12.5	0.415511	0.00183987	0	1
Mirafra_rufa	Mirafra rufa	Rusty Lark	Alaudidae	0	0	NA	1	29.1974	1.46464	100	5	0.819684	0.00450644	0	0
Mirafra_rufocinnamomea	Mirafra rufocinnamomea	Flappet Lark	Alaudidae	0	0	0	1	22.7374	1.41996	100	25	0.761231	0.00243801	0	1
Mirafra_sabota	Mirafra sabota	Sabota Lark	Alaudidae	0	0	0	1	22.407	1.3927	70	6	0.714429	0.00554462	0	1
Mirafra_somalica	Mirafra somalica	Somali Lark	Alaudidae	0	0	0	1	12.7989	1.66839	100	2	0.534037	0.00169873	0	1
Mirafra_williamsi	Mirafra williamsi	Williams's Lark	Alaudidae	0	0	NA	1	36.4806	1.46464	100	17	0.568581	0.00114235	0	1
Pinarocorys_erythropygia	Pinarocorys erythropygia	Rufous-rumped Lark	Alaudidae	0	0	0	1	21.1928	1.47857	80	23	0.743922	0.00254503	2	0
Pinarocorys_nigricans	Pinarocorys nigricans	Dusky Lark	Alaudidae	0	0	0	1	34.2345	1.58149	100	49	0.865141	0.00143799	2	1
Pseudalaemon_fremantlii	Pseudalaemon fremantlii	Short-tailed Lark	Alaudidae	0	0	0	1	22.1084	1.37014	100	5	0.523186	0.00159518	0	0
Rhamphocoris_clotbey	Rhamphocoris clotbey	Thick-billed Lark	Alaudidae	0	0	0	1	48.3396	1.69241	100	0	0.282517	0.0118526	0	1
Spizocorys_conirostris	Spizocorys conirostris	Pink-billed Lark	Alaudidae	0	0	0	1	33.7703	1.15534	100	5	0.657908	0.00664197	0	1
Spizocorys_fringillaris	Spizocorys fringillaris	Botha's Lark	Alaudidae	0	0	0	1	14.9834	1.2833	80	5	0.644072	0.00670146	0	1
Spizocorys_obbiensis	Spizocorys obbiensis	Obbia Lark	Alaudidae	0	0	0	1	47.848	1.13194	100	4	0.609435	0.00116125	0	0
Spizocorys_personata	Spizocorys personata	Masked Lark	Alaudidae	0	0	NA	1	11.8325	1.29447	100	5	0.48856	0.00135212	0	0
Spizocorys_sclateri	Spizocorys sclateri	Sclater's Lark	Alaudidae	0	0	0	1	17.5809	1.27875	80	5	0.430886	0.00841439	0	1
Artamus_cinereus	Artamus cinereus	Black-faced Woodswallow	Artamidae	0	0	0	1	15.0834	1.55145	10	5	0.442377	0.00809038	0	2
Artamus_cyanopterus	Artamus cyanopterus	Dusky Woodswallow	Artamidae	0	0	0	1	8.07702	1.53908	20	13	0.317615	0.00750245	0	2
Artamus_fuscus	Artamus fuscus	Ashy Woodswallow	Artamidae	0	0	0	1	11.8197	1.59988	0	13	0.634944	0.00651933	0	1
Artamus_insignis	Artamus insignis	Bismarck Woodswallow	Artamidae	0	0	NA	1	9.51908	1.71012	0	60	0.15119	0.000578915	0	0
Artamus_leucorynchus	Artamus leucorynchus	White-breasted Woodswallow	Artamidae	0	0	0	1	23.2399	1.61639	0	14	0.360571	0.004758	0	1
Artamus_maximus	Artamus maximus	Great Woodswallow	Artamidae	0	0	0	1	33.0405	1.76492	0	73	0.148388	0.000541532	0	1
Artamus_mentalis	Artamus mentalis	Fiji Woodswallow	Artamidae	0	0	NA	1	14.9367	1.62221	0	5	0.294662	0.00182447	0	0
Artamus_minor	Artamus minor	Little Woodswallow	Artamidae	0	0	0	1	16.9723	1.20412	10	5	0.510794	0.00791373	0	1
Artamus_monachus	Artamus monachus	Ivory-backed Woodswallow	Artamidae	0	0	NA	1	22.3316	1.63959	0	62.5	0.217292	0.00044433	0	0
Artamus_personatus	Artamus personatus	Masked Woodswallow	Artamidae	0	0	0	1	65.1093	1.53908	30	5	0.44232	0.00819561	0	1
Artamus_superciliosus	Artamus superciliosus	White-browed Woodswallow	Artamidae	0	0	0	1	69.7004	1.55023	30	6	0.385155	0.00799284	0	2
Atrichornis_clamosus	Atrichornis clamosus	Noisy Scrub-bird	Atrichornithidae	0	0	3	0	58.5886	1.63397	70	9	0.294753	0.00543589	0	2
Atrichornis_rufescens	Atrichornis rufescens	Rufous Scrub-bird	Atrichornithidae	0	0	3	0	50.735	1.38021	100	53	0.272983	0.00678726	0	1
Bombycilla_cedrorum	Bombycilla cedrorum	Cedar Waxwing	Bombycillidae	0	0	0	1	10.5904	1.49969	0	44	0.239923	0.0159548	0	3
Bombycilla_garrulus	Bombycilla garrulus	Bohemian Waxwing	Bombycillidae	0	0	0	1	14.0498	1.73473	0	36	0.251906	0.0225651	1	3
Bombycilla_japonica	Bombycilla japonica	Japanese Waxwing	Bombycillidae	0	0	0	1	16.2712	1.62634	0	42	0.512826	0.0269949	2	1
Hypocolius_ampelinus	Hypocolius ampelinus	Grey Hypocolius	Bombycillidae	0	0	0	1	75.7445	1.72673	50	5	0.624808	0.0142971	1	2
Phainopepla_nitens	Phainopepla nitens	Phainopepla	Bombycillidae	0	0	0	1	93.3777	1.34439	0	5	0.514243	0.0090152	1	2
Phainoptila_melanoxantha	Phainoptila melanoxantha	Black-and-yellow Silky-flycatcher	Bombycillidae	0	0	0	1	87.4115	1.74819	0	55	0.343102	0.000773862	0	1
Ptilogonys_caudatus	Ptilogonys caudatus	Long-tailed Silky-flycatcher	Bombycillidae	0	0	0	1	58.6034	1.55991	0	53	0.351181	0.000762942	0	1
Ptilogonys_cinereus	Ptilogonys cinereus	Grey Silky-flycatcher	Bombycillidae	0	0	NA	1	31.5109	1.52634	0	34	0.617511	0.00337631	0	1
Callaeas_cinereus	Callaeas cinereus	Kokako	Callaeatidae	0	0	0	1	6.57908	2.35315	0	63	0.145369	0.00514272	0	1
Philesturnus_carunculatus	Philesturnus carunculatus	Saddleback	Callaeatidae	0	0	0	1	14.0176	1.87477	40	17	0.162981	0.00473988	0	2
Campephaga_flava	Campephaga flava	Black Cuckooshrike	Campephagidae	0	0	0	1	158.105	1.5092	80	31.5	0.736547	0.00229141	0	1
Campephaga_lobata	Campephaga lobata	Western Wattled Cuckooshrike	Campephagidae	0	0	NA	1	42.4738	1.51983	0	34	0.394566	0.0014225	0	0
Campephaga_oriolina	Campephaga oriolina	Eastern Wattled Cuckooshrike	Campephagidae	0	0	NA	1	34.1664	1.48671	0	80	0.257124	0.000989047	0	0
Campephaga_petiti	Campephaga petiti	Petit's Cuckooshrike	Campephagidae	0	0	NA	1	159.486	1.49624	0	63	0.500997	0.00109838	0	1
Campephaga_phoenicea	Campephaga phoenicea	Red-shouldered Cuckooshrike	Campephagidae	0	0	0	1	121.882	1.43297	40	18	0.771296	0.00256141	1	1
Campephaga_quiscalina	Campephaga quiscalina	Purple-throated Cuckooshrike	Campephagidae	0	0	0	1	190.778	1.53782	0	48	0.463085	0.00154423	0	1
Campochaera_sloetii	Campochaera sloetii	Golden Cuckooshrike	Campephagidae	0	0	NA	1	58.7011	1.61278	0	69.5	0.145932	0.000591574	0	1
Coracina_abbotti	Coracina abbotti	Pygmy Cuckooshrike	Campephagidae	0	0	NA	1	19.8041	1.83225	0	72	0.204534	0.000402326	0	0
Coracina_analis	Coracina analis	New Caledonian Cuckooshrike	Campephagidae	0	0	NA	1	10.8706	1.92169	10	46	0.31715	0.00324406	0	0
Coracina_atriceps	Coracina atriceps	Moluccan Cuckooshrike	Campephagidae	0	0	NA	1	98.7962	2.14301	0	54	0.21103	0.000803414	0	0
Coracina_azurea	Coracina azurea	Blue Cuckooshrike	Campephagidae	0	0	NA	1	56.5195	1.6637	0	73	0.323912	0.00117421	0	1
Coracina_bicolor	Coracina bicolor	Pied Cuckooshrike	Campephagidae	0	0	NA	1	115.02	1.83225	0	59	0.19895	0.000403796	0	0
Coracina_boyeri	Coracina boyeri	Boyer's Cuckooshrike	Campephagidae	0	0	0	1	125.532	1.82217	0	75	0.169772	0.000740483	0	1
Coracina_caeruleogrisea	Coracina caeruleogrisea	Stout-billed Cuckooshrike	Campephagidae	0	0	0	1	18.7189	2.14145	0	76	0.156765	0.000590239	0	0
Coracina_caesia	Coracina caesia	Grey Cuckooshrike	Campephagidae	0	0	0	1	95.9978	1.67486	0	24	0.469165	0.00209364	0	1
Coracina_caledonica	Coracina caledonica	Melanesian Cuckooshrike	Campephagidae	0	0	NA	1	18.2917	2.14613	10	1	0.270257	0.00311104	0	1
Coracina_ceramensis	Coracina ceramensis	Pale Cicadabird	Campephagidae	0	0	NA	1	71.0659	1.68124	0	47.5	0.221882	0.00090938	0	0
Coracina_cinerea	Coracina cinerea	Ashy Cuckooshrike	Campephagidae	0	0	NA	1	88.9895	1.67394	0	19.5	0.502402	0.00323843	0	1
Coracina_coerulescens	Coracina coerulescens	Blackish Cuckooshrike	Campephagidae	0	0	NA	1	70.9931	1.79865	0	17	0.387512	0.00160813	0	0
Coracina_dispar	Coracina dispar	Kai Cicadabird	Campephagidae	0	0	NA	1	149.856	1.83225	0	47	0.345773	0.00110119	0	0
Coracina_dohertyi	Coracina dohertyi	Sumba Cicadabird	Campephagidae	0	0	NA	1	100.729	1.83225	0	37	0.520594	0.000937751	0	0
Coracina_fimbriata	Coracina fimbriata	Lesser Cuckooshrike	Campephagidae	0	0	NA	1	141.573	1.46687	0	55	0.180161	0.000573251	0	0
Coracina_fortis	Coracina fortis	Buru Cuckooshrike	Campephagidae	0	0	NA	1	24.9204	1.83225	10	48	0.224082	0.000905886	0	0
Coracina_graueri	Coracina graueri	Grauer's Cuckooshrike	Campephagidae	0	0	NA	1	80.3625	1.83225	0	80	0.205635	0.000916998	0	0
Coracina_holopolia	Coracina holopolia	Solomons Cuckooshrike	Campephagidae	0	0	NA	1	156.116	1.68931	0	33.5	0.144209	0.000609935	0	0
Coracina_incerta	Coracina incerta	Black-shouldered Cicadabird	Campephagidae	0	0	NA	1	99.2129	1.77012	0	76	0.154368	0.000554368	0	0
Coracina_javensis	Coracina javensis	Javan Cuckooshrike	Campephagidae	0	0	NA	1	24.7682	1.83225	0	5	0.42703	0.000617422	0	0
Coracina_larvata	Coracina larvata	Sunda Cuckooshrike	Campephagidae	0	0	NA	1	68.7628	1.83225	0	45	0.152814	0.000553138	0	0
Coracina_leucopygia	Coracina leucopygia	White-rumped Cuckooshrike	Campephagidae	0	0	NA	1	35.4534	1.83225	20	62.5	0.217292	0.000441683	0	0
Coracina_lineata	Coracina lineata	Yellow-eyed Cuckooshrike	Campephagidae	0	0	0	1	31.9291	1.92014	0	44	0.302236	0.00264922	0	1
Coracina_longicauda	Coracina longicauda	Hooded Cuckooshrike	Campephagidae	0	0	0	1	81.9909	2.00432	0	73	0.151731	0.000505952	0	0
Coracina_macei	Coracina macei	Large Cuckooshrike	Campephagidae	0	0	NA	1	41.9036	1.83225	10	17	0.668647	0.00500783	0	1
Coracina_maxima	Coracina maxima	Ground Cuckooshrike	Campephagidae	0	0	0	1	10.0322	2.1038	33	5	0.432461	0.00851441	0	1
Coracina_mcgregori	Coracina mcgregori	McGregor's Cuckooshrike	Campephagidae	0	0	NA	1	24.6397	1.62941	0	43	0.188408	0.000703798	0	0
Coracina_melanoptera	Coracina melanoptera	Black-headed Cuckooshrike	Campephagidae	0	0	0	1	136.526	1.47712	20	14	0.744262	0.00590273	1	1
Coracina_melas	Coracina melas	New Guinea Cuckooshrike	Campephagidae	0	0	NA	1	160.211	1.77452	0	75	0.165015	0.000638036	0	0
Coracina_melaschistos	Coracina melaschistos	Black-winged Cuckooshrike	Campephagidae	0	0	0	1	85.2785	1.63347	0	20	0.500324	0.00961792	1	1
Coracina_mindanensis	Coracina mindanensis	Black-bibbed Cicadabird	Campephagidae	0	0	NA	1	136.761	1.76864	0	32	0.262203	0.00111098	0	1
Coracina_montana	Coracina montana	Black-bellied Cuckooshrike	Campephagidae	0	0	NA	1	114.801	1.899	0	75	0.148388	0.000496721	0	0
Coracina_morio	Coracina morio	Sulawesi Cicadabird	Campephagidae	0	0	NA	1	94.1336	1.76716	0	59	0.21744	0.00043493	0	0
Coracina_newtoni	Coracina newtoni	Reunion Cuckooshrike	Campephagidae	0	0	0	1	45.7473	1.83225	0	26	0.321701	0.00283086	0	1
Coracina_novaehollandiae	Coracina novaehollandiae	Black-faced Cuckooshrike	Campephagidae	0	0	0	1	10.5254	2.07188	33	5	0.435785	0.00801017	1	2
Coracina_ostenta	Coracina ostenta	White-winged Cuckooshrike	Campephagidae	0	0	0	1	134.116	1.83225	0	19.5	0.402378	0.000943936	0	0
Coracina_papuensis	Coracina papuensis	White-bellied Cuckooshrike	Campephagidae	0	0	0	1	35.3758	1.80868	20	17	0.36833	0.00544579	0	2
Coracina_parvula	Coracina parvula	Halmahera Cuckooshrike	Campephagidae	0	0	NA	1	9.71524	1.83225	0	73	0.18965	0.000390122	0	0
Coracina_pectoralis	Coracina pectoralis	White-breasted Cuckooshrike	Campephagidae	0	0	0	1	53.2557	1.7356	0	29	0.826396	0.00252342	0	1
Coracina_personata	Coracina personata	Wallacean Cuckooshrike	Campephagidae	0	0	NA	1	81.8805	1.83225	0	30.5	0.520594	0.00101418	0	1
Coracina_polioptera	Coracina polioptera	Indochinese Cuckooshrike	Campephagidae	0	0	NA	1	36.5431	1.55388	0	34	0.679413	0.00237662	0	0
Coracina_schistacea	Coracina schistacea	Slaty Cuckooshrike	Campephagidae	0	0	NA	1	95.6346	1.83225	0	18	0.231306	0.000905886	0	0
Coracina_schisticeps	Coracina schisticeps	Grey-headed Cuckooshrike	Campephagidae	0	0	NA	1	83.7751	1.72263	0	77	0.144136	0.000628416	0	0
Coracina_striata	Coracina striata	Bar-bellied Cuckooshrike	Campephagidae	0	0	0	0	36.4125	2.04532	0	45	0.195416	0.000625097	0	1
Coracina_sula	Coracina sula	Sula Cicadabird	Campephagidae	0	0	NA	1	55.7323	1.83225	0	9	0.222582	0.000688336	0	0
Coracina_temminckii	Coracina temminckii	Cerulean Cuckooshrike	Campephagidae	0	0	NA	1	9.44712	1.83225	0	71	0.20619	0.000427981	0	0
Coracina_tenuirostris	Coracina tenuirostris	Slender-billed Cicadabird	Campephagidae	0	0	0	1	88.841	1.78604	0	40	0.255927	0.00212411	1	2
Coracina_typica	Coracina typica	Mauritius Cuckooshrike	Campephagidae	0	0	0	1	129.59	1.63246	0	5	0.259713	NA	0	1
Hemipus_hirundinaceus	Hemipus hirundinaceus	Black-winged Flycatcher-shrike	Campephagidae	0	0	0	1	28.2157	1.0086	0	52	0.182491	0.000563502	0	0
Hemipus_picatus	Hemipus picatus	Bar-winged Flycatcher-shrike	Campephagidae	0	0	0	1	36.6196	0.954243	10	30	0.612925	0.00364253	0	1
Lalage_atrovirens	Lalage atrovirens	Black-browed Triller	Campephagidae	0	0	0	1	31.4022	1.51851	0	79	0.15385	0.000412783	0	0
Lalage_aurea	Lalage aurea	Rufous-bellied Triller	Campephagidae	0	0	NA	1	68.999	1.50515	0	73	0.18965	0.000390122	0	0
Lalage_leucomela	Lalage leucomela	Varied Triller	Campephagidae	0	0	0	1	47.3384	1.4874	0	32	0.385388	0.00251731	0	1
Lalage_leucopyga	Lalage leucopyga	Long-tailed Triller	Campephagidae	1	0	NA	1	62.0354	1.38561	100	2	0.260109	0.00306614	0	0
Lalage_leucopygialis	Lalage leucopygialis	White-rumped Triller	Campephagidae	0	0	NA	1	35.58	1.47012	0	56	0.223384	0.000453626	0	1
Lalage_maculosa	Lalage maculosa	Polynesian Triller	Campephagidae	0	0	NA	1	57.338	1.48144	100	4	0.274767	0.00174917	0	1
Lalage_melanoleuca	Lalage melanoleuca	Black-and-white Triller	Campephagidae	0	0	NA	1	51.8449	1.67025	0	32.5	0.259344	0.00108995	0	0
Lalage_moesta	Lalage moesta	White-browed Triller	Campephagidae	0	0	NA	NA	NA	1.47012	0	NA	NA	NA	NA	0
Lalage_nigra	Lalage nigra	Pied Triller	Campephagidae	0	0	0	1	60.6976	1.45332	20	44	0.194756	0.000590222	0	1
Lalage_sharpei	Lalage sharpei	Samoan Triller	Campephagidae	0	0	NA	1	18.0324	1.45682	0	0	0.274767	NA	0	0
Lalage_sueurii	Lalage sueurii	White-shouldered Triller	Campephagidae	0	0	0	1	84.6434	1.49136	100	34	0.424331	0.000687288	0	1
Pheucticus_ludovicianus	Pheucticus ludovicianus	Rose-breasted Grosbeak	Cardinalidae	1	0	0	1	100.027	1.62325	20	39.5	0.253173	0.0163802	2	3
Pericrocotus_brevirostris	Pericrocotus brevirostris	Short-billed Minivet	Campephagidae	0	0	0	1	124.122	1.21748	0	18	0.565462	0.00828436	0	1
Pericrocotus_cantonensis	Pericrocotus cantonensis	Brown-rumped Minivet	Campephagidae	0	0	NA	1	67.7151	1.21112	0	11	0.463961	0.0121612	2	1
Pericrocotus_cinnamomeus	Pericrocotus cinnamomeus	Small Minivet	Campephagidae	0	0	0	1	86.5721	0.934498	0	11	0.712116	0.00471533	0	1
Pericrocotus_divaricatus	Pericrocotus divaricatus	Ashy Minivet	Campephagidae	0	0	0	1	64.3274	1.39094	0	36	0.512205	0.0234907	0	2
Pericrocotus_erythropygius	Pericrocotus erythropygius	White-bellied Minivet	Campephagidae	0	0	0	1	98.7816	1.03342	50	10	0.754206	0.00631876	0	1
Pericrocotus_ethologus	Pericrocotus ethologus	Long-tailed Minivet	Campephagidae	0	0	0	1	104.884	1.27875	0	23	0.53683	0.0103205	1	1
Pericrocotus_flammeus	Pericrocotus flammeus	Scarlet Minivet	Campephagidae	0	0	0	1	118.567	1.36736	0	28	0.528675	0.00365839	0	1
Pericrocotus_igneus	Pericrocotus igneus	Fiery Minivet	Campephagidae	0	0	NA	1	123.724	1.17609	0	63	0.172882	0.000559302	0	0
Pericrocotus_lansbergei	Pericrocotus lansbergei	Flores Minivet	Campephagidae	0	0	NA	1	68.1273	1.21112	0	24	0.52548	0.000915576	0	0
Pericrocotus_miniatus	Pericrocotus miniatus	Sunda Minivet	Campephagidae	0	0	NA	1	35.3455	1.21112	0	10.5	0.216598	0.000549535	0	0
Pericrocotus_roseus	Pericrocotus roseus	Rosy Minivet	Campephagidae	0	0	0	1	56.0195	1.2833	0	27	0.538185	0.00747299	1	1
Pericrocotus_solaris	Pericrocotus solaris	Grey-chinned Minivet	Campephagidae	0	0	0	1	91.3477	1.16137	0	31	0.502645	0.00573703	0	1
Pericrocotus_tegimae	Pericrocotus tegimae	Ryukyu Minivet	Campephagidae	0	0	NA	NA	NA	1.21112	0	NA	NA	NA	NA	0
Tephrodornis_gularis	Tephrodornis gularis	Large Woodshrike	Campephagidae	0	0	0	1	29.2277	1.57749	10	31	0.51806	0.00380357	0	1
Tephrodornis_pondicerianus	Tephrodornis pondicerianus	Common Woodshrike	Campephagidae	0	0	0	1	11.3152	1.30535	10	11	0.71852	0.00530414	0	1
Amaurospiza_carrizalensis	Amaurospiza carrizalensis	Carrizal Seedeater	Cardinalidae	0	0	NA	1	110.241	1.12385	50	40	0.395447	0.000961683	0	1
Amaurospiza_concolor	Amaurospiza concolor	Blue Seedeater	Cardinalidae	0	0	NA	1	96.6426	1.11727	20	42	0.371203	0.00148712	0	1
Amaurospiza_moesta	Amaurospiza moesta	Blackish-blue Seedeater	Cardinalidae	0	0	NA	1	100.937	1.13354	70	43	0.247566	0.0043614	0	1
Cardinalis_cardinalis	Cardinalis cardinalis	Northern Cardinal	Cardinalidae	0	0	0	1	71.3121	1.62992	40	20	0.276969	0.0122132	0	3
Cardinalis_phoeniceus	Cardinalis phoeniceus	Vermilion Cardinal	Cardinalidae	0	0	0	1	84.4035	1.59218	70	15	0.398441	0.00116046	0	1
Cardinalis_sinuatus	Cardinalis sinuatus	Pyrrhuloxia	Cardinalidae	0	0	0	1	64.716	1.54654	60	6	0.436675	0.00900312	0	1
Caryothraustes_canadensis	Caryothraustes canadensis	Yellow-green Grosbeak	Cardinalidae	0	0	0	1	17.8076	1.53782	0	72	0.300631	0.000956561	0	1
Caryothraustes_poliogaster	Caryothraustes poliogaster	Black-faced Grosbeak	Cardinalidae	0	0	0	1	16.3989	1.62118	0	68	0.310355	0.00239129	0	1
Chlorothraupis_carmioli	Chlorothraupis carmioli	Olive Tanager	Cardinalidae	0	0	NA	1	10.8817	1.5813	0	70	0.318684	0.000958121	0	1
Chlorothraupis_olivacea	Chlorothraupis olivacea	Lemon-spectacled Tanager	Cardinalidae	0	0	NA	1	13.2927	1.59106	0	46	0.194441	0.000546465	0	0
Chlorothraupis_stolzmanni	Chlorothraupis stolzmanni	Ochre-breasted Tanager	Cardinalidae	0	0	NA	1	12.4685	1.58883	0	6	0.249371	0.000605661	0	0
Cyanocompsa_brissonii	Cyanocompsa brissonii	Ultramarine Grosbeak	Cardinalidae	0	0	NA	1	113.799	1.43933	50	35	0.462511	0.00274778	0	1
Cyanocompsa_cyanoides	Cyanocompsa cyanoides	Blue-black Grosbeak	Cardinalidae	0	0	0	1	79.2539	1.51188	70	77	0.325527	0.000848994	0	1
Cyanocompsa_parellina	Cyanocompsa parellina	Blue Bunting	Cardinalidae	0	0	NA	1	121.949	1.19451	20	47.5	0.403999	0.00283441	0	1
Cyanoloxia_glaucocaerulea	Cyanoloxia glaucocaerulea	Glaucous-blue Grosbeak	Cardinalidae	0	0	NA	1	112.926	1.26007	50	42	0.185743	0.00631957	1	0
Granatellus_pelzelni	Granatellus pelzelni	Rose-breasted Chat	Cardinalidae	0	0	NA	1	119.5	1.04922	0	76	0.385625	0.00096749	0	0
Granatellus_sallaei	Granatellus sallaei	Grey-throated Chat	Cardinalidae	0	0	0	1	115.735	0.995635	30	63.5	0.342307	0.00273873	0	1
Granatellus_venustus	Granatellus venustus	Red-breasted Chat	Cardinalidae	0	0	0	1	99.9281	1.03342	0	38.5	0.77915	0.00209421	0	1
Habia_atrimaxillaris	Habia atrimaxillaris	Black-cheeked Ant-tanager	Cardinalidae	0	0	NA	1	29.6194	1.68931	0	39	0.305718	0.000907815	0	1
Habia_cristata	Habia cristata	Crested Ant-tanager	Cardinalidae	0	0	NA	1	7.7898	1.57194	10	7.5	0.202895	0.000571999	0	1
Habia_fuscicauda	Habia fuscicauda	Red-throated Ant-tanager	Cardinalidae	0	0	0	1	69.657	1.58243	10	56	0.343974	0.00247106	0	1
Habia_gutturalis	Habia gutturalis	Sooty Ant-tanager	Cardinalidae	0	0	0	1	10.0028	1.52375	0	31.5	0.290624	0.000600063	0	0
Habia_rubica	Habia rubica	Red-crowned Ant-tanager	Cardinalidae	0	0	0	1	63.9028	1.51188	0	76	0.3289	0.0009022	0	2
Parkerthraustes_humeralis	Parkerthraustes humeralis	Yellow-shouldered Grosbeak	Cardinalidae	0	0	NA	1	10.6561	1.5682	0	80	0.384384	0.000778323	0	1
Periporphyrus_erythromelas	Periporphyrus erythromelas	Red-and-black Grosbeak	Cardinalidae	0	0	NA	1	62.6901	1.68124	0	67	0.338851	0.000955987	0	0
Pheucticus_aureoventris	Pheucticus aureoventris	Black-backed Grosbeak	Cardinalidae	0	0	0	1	111.472	1.6902	30	39.5	0.461167	0.00256345	1	1
Pheucticus_chrysogaster	Pheucticus chrysogaster	Golden-bellied Grosbeak	Cardinalidae	0	0	0	1	53.587	1.74663	30	12	0.425087	0.00112048	0	1
Pheucticus_chrysopeplus	Pheucticus chrysopeplus	Yellow Grosbeak	Cardinalidae	0	0	NA	1	75.817	1.88986	0	42	0.744023	0.00306012	1	1
Motacilla_citreola	Motacilla citreola	Citrine Wagtail	Motacillidae	1	1	0	1	71.8938	1.28443	100	5	0.28227	0.0196865	2	3
Pheucticus_melanocephalus	Pheucticus melanocephalus	Black-headed Grosbeak	Cardinalidae	0	0	0	1	94.3633	1.67348	10	5	0.343472	0.0133293	1	3
Pheucticus_tibialis	Pheucticus tibialis	Black-thighed Grosbeak	Cardinalidae	0	0	NA	1	47.2004	1.79449	0	59	0.304547	0.000719134	0	0
Piranga_bidentata	Piranga bidentata	Flame-coloured Tanager	Cardinalidae	0	0	NA	1	84.3041	1.56309	10	44.5	0.624652	0.00295509	0	1
Piranga_erythrocephala	Piranga erythrocephala	Red-headed Tanager	Cardinalidae	0	0	NA	1	98.1461	1.33846	0	43	0.740712	0.00310129	0	1
Piranga_flava	Piranga flava	Hepatic Tanager	Cardinalidae	0	0	0	1	95.5253	1.57634	0	38	0.524812	0.00281929	1	2
Piranga_leucoptera	Piranga leucoptera	White-winged Tanager	Cardinalidae	0	0	NA	1	145.499	1.20412	0	52	0.323761	0.00114056	0	1
Piranga_olivacea	Piranga olivacea	Scarlet Tanager	Cardinalidae	1	0	0	1	133.259	1.45025	10	51	0.162544	0.0148117	2	3
Ploceus_megarhynchus	Ploceus megarhynchus	Yellow Weaver	Ploceidae	1	1	3	1	87.8678	1.53782	20	25.5	0.601316	0.00864908	0	1
Piranga_roseogularis	Piranga roseogularis	Rose-throated Tanager	Cardinalidae	0	0	NA	1	55.0703	1.38021	0	65	0.342335	0.00267712	0	0
Piranga_rubra	Piranga rubra	Summer Tanager	Cardinalidae	0	0	0	1	118.028	1.46464	0	21	0.215272	0.0115341	2	3
Piranga_rubriceps	Piranga rubriceps	Red-hooded Tanager	Cardinalidae	0	0	NA	1	42.9336	1.55509	0	27	0.209856	0.000607323	0	0
Rhodothraupis_celaeno	Rhodothraupis celaeno	Crimson-collared Grosbeak	Cardinalidae	0	0	NA	1	64.222	1.77815	40	26	0.376621	0.00532762	0	1
Saltator_albicollis	Saltator albicollis	Lesser Antillean Saltator	Cardinalidae	0	0	0	1	24.5299	1.61909	20	39	0.243501	0.00131996	0	1
Saltator_atriceps	Saltator atriceps	Black-headed Saltator	Cardinalidae	0	0	NA	1	14.7803	1.92376	0	52	0.361217	0.00216346	0	1
Saltator_atricollis	Saltator atricollis	Black-throated Saltator	Cardinalidae	0	0	NA	1	21.4573	1.73078	60	32	0.648666	0.0018129	0	1
Saltator_atripennis	Saltator atripennis	Black-winged Saltator	Cardinalidae	0	0	NA	1	28.6188	1.74036	0	16	0.204482	0.000604558	0	0
Saltator_aurantiirostris	Saltator aurantiirostris	Golden-billed Saltator	Cardinalidae	0	0	NA	1	60.9833	1.62325	0	31	0.422279	0.00676652	0	1
Saltator_cinctus	Saltator cinctus	Masked Saltator	Cardinalidae	0	0	NA	1	12.2426	1.68664	0	26	0.21609	0.000680077	0	1
Saltator_coerulescens	Saltator coerulescens	Greyish Saltator	Cardinalidae	0	0	NA	1	26.039	1.73957	0	64	0.402062	0.00112086	0	1
Saltator_fuliginosus	Saltator fuliginosus	Black-throated Grosbeak	Cardinalidae	0	0	NA	1	26.6563	1.70329	0	41	0.2703	0.00397404	0	0
Saltator_grossus	Saltator grossus	Slate-coloured Grosbeak	Cardinalidae	0	0	NA	1	30.4678	1.64542	0	78	0.304343	0.000805275	0	1
Saltator_maxillosus	Saltator maxillosus	Thick-billed Saltator	Cardinalidae	0	0	NA	1	62.6817	1.70586	0	53	0.192722	0.00478685	0	1
Saltator_maximus	Saltator maximus	Buff-throated Saltator	Cardinalidae	0	0	0	1	29.9927	1.67806	20	73	0.371381	0.000935841	0	1
Saltator_nigriceps	Saltator nigriceps	Black-cowled Saltator	Cardinalidae	0	0	NA	1	6.86152	NA	0	6	0.388526	0.000710042	0	0
Saltator_orenocensis	Saltator orenocensis	Orinoco Saltator	Cardinalidae	0	0	NA	1	19.273	1.52763	0	21	0.5951	0.00122526	0	1
Saltator_rufiventris	Saltator rufiventris	Rufous-bellied Saltator	Cardinalidae	0	0	NA	1	15.8004	1.87011	40	12	0.586526	0.00425726	0	1
Saltator_similis	Saltator similis	Green-winged Saltator	Cardinalidae	0	0	NA	1	21.003	1.63649	0	34	0.472679	0.00286907	0	1
Saltator_striatipectus	Saltator striatipectus	Streaked Saltator	Cardinalidae	0	0	0	1	34.0034	1.59106	0	20	0.371985	0.000779207	0	1
Camaroptera_fasciolata	Camaroptera fasciolata	Barred Wren-warbler	Cisticolidae	1	0	0	1	77.0409	1.11727	0	5	0.754522	0.00616713	0	1
Certhia_americana	Certhia americana	American Treecreeper	Certhiidae	0	0	0	1	13.4623	0.908485	10	42	0.231453	0.0141099	1	2
Certhia_brachydactyla	Certhia brachydactyla	Short-toed Treecreeper	Certhiidae	0	0	1	1	23.8357	0.913814	40	11	0.210364	0.0107291	0	3
Certhia_discolor	Certhia discolor	Brown-throated Treecreeper	Certhiidae	0	0	0	1	23.2436	1.01703	0	9	0.533056	0.00966205	0	1
Certhia_familiaris	Certhia familiaris	Eurasian Treecreeper	Certhiidae	0	0	1	1	12.9204	0.954243	40	25	0.213326	0.0175087	0	3
Certhia_himalayana	Certhia himalayana	Bar-tailed Treecreeper	Certhiidae	0	0	0	1	27.8445	0.944483	10	6	0.492055	0.0124356	1	1
Certhia_hodgsoni	Certhia hodgsoni	Hodgson's Treecreeper	Certhiidae	0	0	NA	1	20.7319	0.991226	40	13	0.551802	0.0109837	0	1
Certhia_manipurensis	Certhia manipurensis	Manipur Treecreeper	Certhiidae	0	0	NA	1	20.939	1	0	50	0.622738	0.00479243	0	1
Certhia_nipalensis	Certhia nipalensis	Rusty-flanked Treecreeper	Certhiidae	0	0	0	1	50.0732	1.04532	50	6	0.500324	0.010198	0	1
Certhia_tianquanensis	Certhia tianquanensis	Sichuan Treecreeper	Certhiidae	0	0	NA	1	44.7731	0.954243	40	28	0.551802	0.0109879	0	1
Salpornis_spilonotus	Salpornis spilonotus	Spotted Treecreeper	Certhiidae	0	0	0	1	24.9822	1.17026	0	29	0.792762	0.00243865	0	1
Chloropsis_aurifrons	Chloropsis aurifrons	Golden-fronted Leafbird	Chloropseidae	0	0	0	1	70.4319	1.51188	0	21	0.704102	0.00447719	0	2
Chloropsis_cochinchinensis	Chloropsis cochinchinensis	Blue-winged Leafbird	Chloropseidae	0	0	0	1	49.4517	1.38917	0	41	0.503659	0.00150303	0	1
Chloropsis_cyanopogon	Chloropsis cyanopogon	Lesser Green Leafbird	Chloropseidae	0	0	0	1	32.42	1.34242	0	62	0.168914	0.000557722	0	1
Chloropsis_flavipennis	Chloropsis flavipennis	Philippine Leafbird	Chloropseidae	0	0	NA	1	9.59441	1.549	0	34.5	0.208505	0.00080439	0	0
Chloropsis_hardwickii	Chloropsis hardwickii	Orange-bellied Leafbird	Chloropseidae	0	0	0	1	98.0795	1.51521	0	32	0.494678	0.0074396	0	1
Chloropsis_jerdoni	Chloropsis jerdoni	Jerdon's Leafbird	Chloropseidae	0	0	NA	1	70.6846	1.38917	0	11	0.734348	0.00498519	0	1
Chloropsis_kinabaluensis	Chloropsis kinabaluensis	Bornean Leafbird	Chloropseidae	0	0	NA	1	60.481	1.38917	0	77.5	0.152861	0.000684125	0	0
Chloropsis_media	Chloropsis media	Sumatran Leafbird	Chloropseidae	0	0	0	1	66.0387	1.60206	0	26	0.140904	0.000555334	0	1
Chloropsis_palawanensis	Chloropsis palawanensis	Yellow-throated Leafbird	Chloropseidae	0	0	NA	1	18.6923	1.48216	0	8	0.569074	0.000767012	0	0
Chloropsis_sonnerati	Chloropsis sonnerati	Greater Green Leafbird	Chloropseidae	0	0	NA	1	55.941	1.66087	0	52	0.176488	0.000564578	0	1
Chloropsis_venusta	Chloropsis venusta	Blue-masked Leafbird	Chloropseidae	0	0	NA	1	70.0256	1.48001	0	18	0.162231	0.00055577	0	0
Cinclus_cinclus	Cinclus cinclus	White-throated Dipper	Cinclidae	0	0	2	1	5.81414	1.7874	100	5	0.298122	0.0132499	1	3
Cinclus_leucocephalus	Cinclus leucocephalus	White-capped Dipper	Cinclidae	0	0	0	1	20.0892	1.64345	100	29.5	0.312101	0.000797461	0	1
Cinclus_mexicanus	Cinclus mexicanus	American Dipper	Cinclidae	0	0	2	1	6.72983	1.75671	100	21	0.277168	0.0138397	0	3
Cinclus_pallasii	Cinclus pallasii	Brown Dipper	Cinclidae	0	0	0	1	6.13768	1.88081	100	12	0.432925	0.0140267	0	2
Cinclus_schulzi	Cinclus schulzi	Rufous-throated Dipper	Cinclidae	0	0	0	1	7.145	1.57519	100	55	0.653921	0.00629104	0	1
Cinclosoma_ajax	Cinclosoma ajax	Painted Quail-thrush	Cinclosomatidae	0	0	NA	1	102.392	1.81471	100	63.5	0.179553	0.000946689	0	1
Cinclosoma_castaneothorax	Cinclosoma castaneothorax	Chestnut-breasted Quail-thrush	Cinclosomatidae	0	0	0	1	105.05	1.78415	100	5	0.479832	0.00932964	0	1
Cinclosoma_castanotum	Cinclosoma castanotum	Chestnut Quail-thrush	Cinclosomatidae	0	0	0	1	99.9377	1.8654	100	5	0.354033	0.00899413	0	1
Cinclosoma_cinnamomeum	Cinclosoma cinnamomeum	Cinnamon Quail-thrush	Cinclosomatidae	0	0	0	1	95.6665	1.75207	100	5	0.338251	0.00973738	0	1
Cinclosoma_punctatum	Cinclosoma punctatum	Spotted Quail-thrush	Cinclosomatidae	0	0	0	1	51.0262	2.055	100	37	0.25142	0.00655029	0	1
Apalis_alticola	Apalis alticola	Brown-headed Apalis	Cisticolidae	0	0	0	1	6.22141	1.08279	0	50	0.907199	0.00145783	0	NA
Apalis_argentea	Apalis argentea	Kungwe Apalis	Cisticolidae	0	0	NA	1	28.7208	0.968483	0	45.5	0.523404	0.00124409	0	NA
Apalis_bamendae	Apalis bamendae	Bamenda Apalis	Cisticolidae	0	0	NA	1	12.4726	0.961895	0	31.5	0.852813	0.00237236	0	1
Apalis_binotata	Apalis binotata	Masked Apalis	Cisticolidae	0	0	0	1	31.3728	0.913814	0	65	0.327584	0.00110334	0	1
Apalis_chapini	Apalis chapini	Chapin's Apalis	Cisticolidae	0	0	0	1	20.8899	0.944483	0	30	0.747931	0.00265589	0	0
Apalis_chariessa	Apalis chariessa	White-winged Apalis	Cisticolidae	0	0	0	1	81.7433	0.944483	0	30	0.505097	0.00239546	0	1
Apalis_chirindensis	Apalis chirindensis	Chirinda Apalis	Cisticolidae	0	0	0	1	17.1511	0.934498	0	41	0.507736	0.00405983	0	1
Apalis_cinerea	Apalis cinerea	Grey Apalis	Cisticolidae	0	0	0	1	10.0059	0.995635	0	30	0.41528	0.00135185	0	1
Apalis_flavida	Apalis flavida	Yellow-breasted Apalis	Cisticolidae	0	0	0	1	59.1294	0.913814	0	26	0.68333	0.00236242	0	1
Apalis_flavigularis	Apalis flavigularis	Yellow-throated Apalis	Cisticolidae	0	0	0	1	18.1673	1.04139	0	51	0.456476	0.00380094	0	0
Apalis_fuscigularis	Apalis fuscigularis	Taita Apalis	Cisticolidae	0	0	NA	1	17.1409	1.04139	20	7.5	0.414738	0.00203945	0	0
Apalis_goslingi	Apalis goslingi	Gosling's Apalis	Cisticolidae	0	0	NA	1	11.4404	0.961895	0	79	0.229573	0.000986898	0	0
Apalis_jacksoni	Apalis jacksoni	Black-throated Apalis	Cisticolidae	0	0	0	1	59.1497	0.939519	0	53	0.377662	0.00115205	0	1
Apalis_karamojae	Apalis karamojae	Karamoja Apalis	Cisticolidae	0	0	NA	1	6.88253	0.963788	0	15	0.424821	0.00143905	0	1
Apalis_lynesi	Apalis lynesi	Namuli Apalis	Cisticolidae	0	0	NA	1	19.3836	1.04139	0	43	0.44414	0.00367513	0	0
Apalis_melanocephala	Apalis melanocephala	Black-headed Apalis	Cisticolidae	0	0	0	1	56.4164	0.944483	0	31	0.522236	0.00248643	0	1
Apalis_nigriceps	Apalis nigriceps	Black-capped Apalis	Cisticolidae	0	0	NA	1	51.1122	0.924279	0	52	0.318878	0.00133214	0	1
Apalis_personata	Apalis personata	Black-faced Apalis	Cisticolidae	0	0	0	1	9.36268	1.04139	0	49	0.28497	0.00101249	0	1
Apalis_porphyrolaema	Apalis porphyrolaema	Chestnut-throated Apalis	Cisticolidae	0	0	NA	1	8.52546	0.924279	0	24	0.335485	0.0012108	0	1
Apalis_ruddi	Apalis ruddi	Rudd's Apalis	Cisticolidae	0	0	0	1	13.9366	0.986772	0	35	0.45802	0.00426483	0	1
Apalis_rufogularis	Apalis rufogularis	Buff-throated Apalis	Cisticolidae	0	0	0	1	55.4741	0.921686	0	54	0.427409	0.00125808	0	1
Apalis_sharpii	Apalis sharpii	Sharpe's Apalis	Cisticolidae	0	0	0	1	64.2006	0.939519	0	25	0.380728	0.00157763	0	1
Apalis_thoracica	Apalis thoracica	Bar-throated Apalis	Cisticolidae	0	0	0	1	22.1268	1.04246	0	19	0.649322	0.00476138	0	2
Carduelis_tristis	Carduelis tristis	American Goldfinch	Fringillidae	1	1	1	1	101.256	1.10721	33	29	0.221485	0.0151786	1	3
Camaroptera_chloronota	Camaroptera chloronota	Olive-green Camaroptera	Cisticolidae	0	0	0	1	10.6618	1.0569	20	66	0.320946	0.00117404	0	1
Anthus_chloris	Anthus chloris	Yellow-breasted Pipit	Motacillidae	1	1	1	1	21.9161	1.39967	100	21	0.521561	0.0055775	1	1
Camaroptera_simplex	Camaroptera simplex	Grey Wren-warbler	Cisticolidae	0	0	0	1	10.0993	1.10721	0	6	0.479435	0.00182164	0	1
Camaroptera_superciliaris	Camaroptera superciliaris	Yellow-browed Camaroptera	Cisticolidae	0	0	0	1	7.59785	0.986772	0	68	0.313388	0.00107445	0	1
Camaroptera_undosa	Camaroptera undosa	Miombo Wren-warbler	Cisticolidae	0	0	0	1	9.38353	1.11394	50	45	0.891104	0.00160767	0	0
Cisticola_aberdare	Cisticola aberdare	Aberdare Cisticola	Cisticolidae	0	0	0	1	22.9293	1.38021	50	17	0.301989	0.00154151	0	1
Cisticola_cantans	Cisticola cantans	Singing Cisticola	Cisticolidae	1	1	0	1	19.6354	1.06819	50	19	0.699046	0.00243315	0	1
Cisticola_ruficeps	Cisticola ruficeps	Red-pate Cisticola	Cisticolidae	1	1	0	1	11.7648	0.986772	50	14	0.830255	0.00286473	0	1
Cisticola_anonymus	Cisticola anonymus	Chattering Cisticola	Cisticolidae	0	0	0	1	14.9136	1.14613	50	77	0.276587	0.000935771	0	1
Cisticola_brunnescens	Cisticola brunnescens	Pectoral-patch Cisticola	Cisticolidae	1	0	0	1	22.2254	0.90309	100	17	0.563924	0.00182513	0	1
Oenanthe_pleschanka	Oenanthe pleschanka	Pied Wheatear	Muscicapidae	1	1	0	1	148.49	1.2878	60	5	0.367158	0.0193856	2	3
Cisticola_bodessa	Cisticola bodessa	Boran Cisticola	Cisticolidae	0	0	0	1	16.6456	1.24304	0	14	0.459454	0.00164795	0	1
Oenanthe_hispanica	Oenanthe hispanica	Black-eared Wheatear	Muscicapidae	1	1	2	1	52.6845	1.17898	80	5	0.320698	0.0118967	2	3
Ploceus_baglafecht	Ploceus baglafecht	Baglafecht Weaver	Ploceidae	1	1	0	1	42.8594	1.49969	40	25	0.50029	0.00178388	0	1
Ploceus_superciliosus	Ploceus superciliosus	Compact Weaver	Ploceidae	1	1	0	1	50.7269	1.33041	50	45	0.452332	0.00121343	0	1
Cisticola_dambo	Cisticola dambo	Black-tailed Cisticola	Cisticolidae	1	0	0	1	22.361	0.954243	60	50	0.81164	0.00139822	0	0
Cisticola_carruthersi	Cisticola carruthersi	Carruthers's Cisticola	Cisticolidae	0	0	0	1	18.443	1.05115	20	38	0.232253	0.00100358	0	1
Cisticola_ayresii	Cisticola ayresii	Wing-snapping Cisticola	Cisticolidae	1	1	0	1	23.074	0.845098	60	31	0.59873	0.00180413	0	1
Cisticola_eximius	Cisticola eximius	Black-necked Cisticola	Cisticolidae	1	0	0	1	70.8586	1.07918	100	17	0.729387	0.00243976	0	1
Cisticola_chubbi	Cisticola chubbi	Chubb's Cisticola	Cisticolidae	0	0	0	1	32.0111	1.20683	0	45	0.286381	0.00115693	0	1
Cisticola_chiniana	Cisticola chiniana	Rattling Cisticola	Cisticolidae	1	1	0	1	25.6797	1.21085	50	32	0.709716	0.00210099	0	1
Cisticola_erythrops	Cisticola erythrops	Red-faced Cisticola	Cisticolidae	1	1	0	1	22.8171	1.17026	0	28	0.641948	0.00215867	0	2
Cisticola_guinea	Cisticola guinea	Dorst's Cisticola	Cisticolidae	1	1	0	1	18.8256	0.968483	40	13	0.944625	0.00290897	0	1
Prinia_flavicans	Prinia flavicans	Black-chested Prinia	Cisticolidae	1	1	0	1	11.8821	0.942008	20	5	0.707243	0.00612851	0	1
Prinia_inornata	Prinia inornata	Plain Prinia	Cisticolidae	1	1	0	1	14.3348	0.845098	50	12	0.651468	0.00607183	0	1
Cisticola_lateralis	Cisticola lateralis	Whistling Cisticola	Cisticolidae	1	0	0	1	18.4081	1.22789	50	39	0.489927	0.0015352	0	1
Prinia_buchanani	Prinia buchanani	Rufous-fronted Prinia	Cisticolidae	1	1	NA	1	7.93934	0.845098	50	7	0.712474	0.00855056	0	0
Prinia_sylvatica	Prinia sylvatica	Jungle Prinia	Cisticolidae	1	1	0	1	17.4836	1.20683	40	11	0.733758	0.00562987	0	1
Anthus_gustavi	Anthus gustavi	Pechora Pipit	Motacillidae	1	1	0	1	33.1435	1.29667	100	17	0.263329	0.0276243	2	2
Cisticola_hunteri	Cisticola hunteri	Hunter's Cisticola	Cisticolidae	0	0	0	1	26.1569	1.19033	50	16	0.406389	0.00162509	0	1
Anthus_roseatus	Anthus roseatus	Rosy Pipit	Motacillidae	1	1	0	1	12.0033	1.32222	90	5	0.537509	0.01234	1	1
Anthus_rubescens	Anthus rubescens	American Pipit	Motacillidae	1	1	0	1	14.553	1.31633	90	6	0.290586	0.0235977	2	2
Motacilla_alba	Motacilla alba	White Wagtail	Motacillidae	1	1	0	1	28.9716	1.36015	100	7	0.271336	0.0185527	1	3
Motacilla_flava	Motacilla flava	Yellow Wagtail	Motacillidae	1	1	0	1	77.1751	1.24558	100	8	0.254478	0.0196691	1	3
Cisticola_nanus	Cisticola nanus	Tiny Cisticola	Cisticolidae	0	0	0	1	18.0019	0.69897	50	12	0.494857	0.00178213	0	0
Anthus_spinoletta	Anthus spinoletta	Water Pipit	Motacillidae	1	1	1	1	23.5751	1.3784	80	6	0.333068	0.0146607	1	3
Cisticola_nigriloris	Cisticola nigriloris	Black-lored Cisticola	Cisticolidae	0	0	0	1	24.624	1.29557	0	37	0.830965	0.00248056	0	0
Cisticola_njombe	Cisticola njombe	Churring Cisticola	Cisticolidae	0	0	0	1	21.88	1.03743	50	41	0.799078	0.00254797	0	0
Oenanthe_oenanthe	Oenanthe oenanthe	Northern Wheatear	Muscicapidae	1	1	2	1	40.7333	1.4088	100	7	0.246781	0.0200625	2	3
Cisticola_restrictus	Cisticola restrictus	Tana River Cisticola	Cisticolidae	0	0	NA	1	37.6431	1.12057	40	18.5	0.547449	0.00171764	0	0
Prinia_flaviventris	Prinia flaviventris	Yellow-bellied Prinia	Cisticolidae	1	0	0	1	22.5033	0.845098	0	26	0.492542	0.00490148	0	2
Dendroica_coronata	Dendroica coronata	Yellow-rumped Warbler	Parulidae	1	1	0	1	37.1875	1.07435	0	32	0.253287	0.0183384	1	3
Ploceus_subaureus	Ploceus subaureus	African Golden Weaver	Ploceidae	1	1	3	1	45.1908	1.48714	100	33	0.537901	0.0026472	0	1
Cisticola_rufus	Cisticola rufus	Rufous Cisticola	Cisticolidae	0	0	0	1	17.6993	0.863323	50	15	0.944851	0.00290199	0	0
Cisticola_subruficapilla	Cisticola subruficapilla	Grey-backed Cisticola	Cisticolidae	0	0	2	1	28.8414	0.997823	50	5	0.414175	0.0069036	0	1
Camaroptera_brachyura	Camaroptera brachyura	Green-backed Camaroptera	Cisticolidae	1	1	0	1	16.224	0.997347	40	23	0.704678	0.0024312	0	1
Cisticola_aberrans	Cisticola aberrans	Lazy Cisticola	Cisticolidae	1	1	0	1	20.0195	1.15331	50	21	0.741044	0.00301357	0	1
Cisticola_troglodytes	Cisticola troglodytes	Foxy Cisticola	Cisticolidae	0	0	0	1	29.2628	1.08279	50	32	0.625589	0.00223419	0	0
Cisticola_woosnami	Cisticola woosnami	Trilling Cisticola	Cisticolidae	0	0	0	1	21.3895	1.13033	50	41	0.903477	0.00202242	0	0
Drymocichla_incana	Drymocichla incana	Red-winged Grey Warbler	Cisticolidae	0	0	NA	1	11.2939	1	0	47.5	0.549167	0.00192797	0	0
Eminia_lepida	Eminia lepida	Grey-capped Warbler	Cisticolidae	0	0	0	1	27.5441	1.30535	0	27	0.407586	0.00138963	0	1
Eremomela_canescens	Eremomela canescens	Green-backed Eremomela	Cisticolidae	0	0	0	1	9.76676	0.845098	0	28	0.624745	0.00227562	0	NA
Euryptila_subcinnamomea	Euryptila subcinnamomea	Kopje Warbler	Cisticolidae	0	0	0	1	22.6242	1.0607	100	5	0.394755	0.00780834	0	1
Cisticola_brachypterus	Cisticola brachypterus	Siffling Cisticola	Cisticolidae	1	1	0	1	18.6083	0.870533	50	34	0.633582	0.00184686	0	0
Hypergerus_atriceps	Hypergerus atriceps	Oriole Warbler	Cisticolidae	0	0	0	1	19.3304	1.47422	50	18	0.815145	0.00254047	0	1
Incana_incana	Incana incana	Socotra Warbler	Cisticolidae	0	0	0	1	64.0129	1.02119	50	16	0.610925	0.00187795	0	1
Malcorus_pectoralis	Malcorus pectoralis	Rufous-eared Warbler	Cisticolidae	0	0	0	1	17.0989	1.00647	100	5	0.578499	0.00761113	0	1
Oreolais_pulchra	Oreolais pulchra	Black-collared Apalis	Cisticolidae	0	0	0	1	12.7284	0.924279	0	30	0.467963	0.00171203	0	1
Oreolais_ruwenzorii	Oreolais ruwenzorii	Collared Apalis	Cisticolidae	0	0	0	1	9.27597	0.995635	0	67	0.217686	0.000908216	0	1
Phragmacia_substriata	Phragmacia substriata	Namaqua Warbler	Cisticolidae	0	0	0	1	10.3809	1.02735	20	5	0.403556	0.00816137	0	1
Phyllolais_pulchella	Phyllolais pulchella	Buff-bellied Warbler	Cisticolidae	0	0	0	1	9.40125	0.778151	0	17	0.555918	0.00223221	0	1
Prinia_atrogularis	Prinia atrogularis	Hill Prinia	Cisticolidae	0	0	0	1	13.0997	1.07188	20	36	0.523393	0.00518107	0	1
Prinia_bairdii	Prinia bairdii	Banded Prinia	Cisticolidae	0	0	0	1	21.4687	1.1271	0	78	0.323844	0.00105403	0	1
Cisticola_galactotes	Cisticola galactotes	Winding Cisticola	Cisticolidae	1	1	0	1	30.0379	1.81291	40	34	0.488752	0.00382081	0	1
Prinia_burnesii	Prinia burnesii	Rufous-vented Prinia	Cisticolidae	0	0	NA	1	16.8259	1.27875	40	5	0.44261	0.0114692	0	1
Prinia_cinereocapilla	Prinia cinereocapilla	Grey-crowned Prinia	Cisticolidae	0	0	NA	1	11.5385	0.860338	0	5	0.552961	0.0101871	0	1
Prinia_crinigera	Prinia crinigera	Striated Prinia	Cisticolidae	0	0	0	1	13.3362	1.13988	50	12	0.421197	0.0111486	0	0
Prinia_familiaris	Prinia familiaris	Bar-winged Prinia	Cisticolidae	0	0	NA	1	7.22742	0.954243	25	13	0.289595	0.000580574	0	1
Cisticola_haesitatus	Cisticola haesitatus	Island Cisticola	Cisticolidae	1	1	0	1	10.1941	0.845098	0	16	0.610925	0.00187795	0	1
Cisticola_natalensis	Cisticola natalensis	Croaking Cisticola	Cisticolidae	1	1	0	1	36.3311	1.22789	50	28	0.662872	0.00210945	0	1
Passerina_versicolor	Passerina versicolor	Varied Bunting	Emberizidae	1	0	0	1	109.396	1.11059	50	11	0.547612	0.0066599	1	1
Prinia_gracilis	Prinia gracilis	Graceful Prinia	Cisticolidae	0	0	0	1	4.44515	0.851258	50	5	0.5206	0.00907113	0	2
Cisticola_tinniens	Cisticola tinniens	Levaillant's Cisticola	Cisticolidae	1	1	0	1	22.3666	1.0569	50	21	0.652842	0.00455927	0	1
Prinia_hypoxantha	Prinia hypoxantha	Saffron-breasted Prinia	Cisticolidae	0	0	0	1	10.9886	1.02119	20	15	0.544175	0.00548313	0	1
Spizella_atrogularis	Spizella atrogularis	Black-chinned Sparrow	Emberizidae	1	0	0	1	31.2457	1.05308	100	7	0.457576	0.0102586	1	1
Prinia_leontica	Prinia leontica	White-eyed Prinia	Cisticolidae	0	0	NA	1	22.4236	1.09342	0	25	0.584763	0.0017725	0	0
Prinia_leucopogon	Prinia leucopogon	White-chinned Prinia	Cisticolidae	0	0	0	1	15.5702	1.06819	30	58	0.368566	0.0010859	0	1
Prinia_maculosa	Prinia maculosa	Karoo Prinia	Cisticolidae	0	0	0	1	32.2477	0.954243	20	5	0.361044	0.00706238	0	2
Prinia_molleri	Prinia molleri	Sao Tome Prinia	Cisticolidae	0	0	0	1	40.4285	0.944483	20	0	0.529657	0.00169796	0	1
Prinia_polychroa	Prinia polychroa	Brown Prinia	Cisticolidae	0	0	NA	1	14.2202	1.04139	50	35	0.66642	0.00304906	0	1
Prinia_robertsi	Prinia robertsi	Briar Warbler	Cisticolidae	0	0	0	1	34.6892	1	0	42	0.536955	0.00415993	0	1
Sporophila_hypoxantha	Sporophila hypoxantha	Tawny-bellied Seedeater	Emberizidae	1	0	0	1	84.8583	1.02119	50	37	0.389984	0.00396237	1	1
Sporophila_torqueola	Sporophila torqueola	White-collared Seedeater	Emberizidae	1	0	0	1	92.1823	0.939519	40	44	0.422274	0.00240191	0	1
Prinia_somalica	Prinia somalica	Pale Prinia	Cisticolidae	0	0	0	1	10.0574	0.875061	0	5	0.510224	0.00157149	0	0
Prinia_rufescens	Prinia rufescens	Rufescent Prinia	Cisticolidae	1	1	0	1	20.3077	0.812913	0	40	0.650443	0.00375092	0	1
Amandava_amandava	Amandava amandava	Red Avadavat	Estrildidae	1	0	0	1	185.647	0.963788	50	11	0.704062	0.00581804	0	2
Rhopophilus_pekinensis	Rhopophilus pekinensis	White-browed Chinese Warbler	Cisticolidae	0	0	NA	1	18.1115	1.25648	0	5	0.523389	0.0176228	0	1
Scotocerca_inquieta	Scotocerca inquieta	Streaked Scrub-warbler	Cisticolidae	0	0	0	1	16.5235	0.913814	50	1	0.42192	0.0123439	0	2
Spiloptila_clamans	Spiloptila clamans	Cricket Longtail	Cisticolidae	0	0	0	1	36.1783	0.845098	50	0	0.722783	0.00583032	0	1
Spiloptila_rufifrons	Spiloptila rufifrons	Red-faced Apalis	Cisticolidae	0	0	0	1	18.1583	0.826075	20	5	0.516706	0.00182164	0	1
Urolais_epichlorus	Urolais epichlorus	Green Longtail	Cisticolidae	0	0	NA	1	20.4011	1.05308	0	44	0.595187	0.00227153	0	0
Climacteris_affinis	Climacteris affinis	White-browed Treecreeper	Climacteridae	0	0	0	1	37.9606	1.33646	20	5	0.358669	0.00933348	0	2
Climacteris_erythrops	Climacteris erythrops	Red-browed Treecreeper	Climacteridae	0	0	0	1	40.8511	1.36736	20	41	0.24131	0.00693567	0	1
Climacteris_melanurus	Climacteris melanurus	Black-tailed Treecreeper	Climacteridae	0	0	0	1	79.59	1.50379	10	7	0.87324	0.00490139	0	0
Climacteris_picumnus	Climacteris picumnus	Brown Treecreeper	Climacteridae	0	0	0	1	44.8751	1.46637	40	11	0.330601	0.00801645	0	2
Climacteris_rufus	Climacteris rufus	Rufous Treecreeper	Climacteridae	0	0	0	1	22.0345	1.51455	30	5	0.333922	0.00789302	0	0
Cormobates_leucophaea	Cormobates leucophaea	White-throated Treecreeper	Climacteridae	0	0	0	1	16.1269	1.34242	0	26.5	0.280583	0.00703522	0	1
Cormobates_placens	Cormobates placens	Papuan Treecreeper	Climacteridae	0	0	NA	1	31.7545	1.19728	0	72	0.163188	0.000567115	0	0
Cnemophilus_loriae	Cnemophilus loriae	Loria's Bird-of-paradise	Cnemophilidae	0	0	3	0	136.944	1.92866	0	65	0.145903	0.000572311	0	1
Cnemophilus_macgregorii	Cnemophilus macgregorii	Crested Bird-of-paradise	Cnemophilidae	0	0	3	0	144.091	1.99123	10	62	0.147686	0.000648244	0	1
Loboparadisea_sericea	Loboparadisea sericea	Yellow-breasted Bird-of-paradise	Cnemophilidae	0	0	3	0	84.2235	1.8293	0	65	0.138859	0.000561779	0	1
Coereba_flaveola	Coereba flaveola	Bananaquit	Coerebidae	0	0	0	1	12.9291	0.987183	0	51	0.40272	0.0012583	0	3
Colluricincla_boweri	Colluricincla boweri	Bower's Shrike-thrush	Colluricinclidae	0	0	0	1	31.5263	1.64147	0	40.5	0.56304	0.00379414	0	1
Colluricincla_harmonica	Colluricincla harmonica	Grey Shrike-thrush	Colluricinclidae	0	0	0	1	32.5268	1.80969	30	5	0.398343	0.00798593	0	2
Colluricincla_megarhyncha	Colluricincla megarhyncha	Little Shrike-thrush	Colluricinclidae	0	0	0	1	10.7782	1.5127	0	37	0.348758	0.0021039	0	1
Colluricincla_sanghirensis	Colluricincla sanghirensis	Sangihe Shrike-thrush	Colluricinclidae	0	0	NA	1	16.3011	1.5563	0	0	0.20606	0.000389771	0	1
Colluricincla_tenebrosa	Colluricincla tenebrosa	Morningbird	Colluricinclidae	0	0	NA	1	11.3945	1.66276	60	70	0.147183	0.000560864	0	NA
Colluricincla_umbrina	Colluricincla umbrina	Sooty Shrike-thrush	Colluricinclidae	0	0	NA	1	21.5278	1.66276	0	0	0.145605	NA	0	0
Colluricincla_woodwardi	Colluricincla woodwardi	Sandstone Shrike-thrush	Colluricinclidae	0	0	0	1	9.6412	1.7364	100	17	0.948799	0.00362753	0	0
Oreoica_gutturalis	Oreoica gutturalis	Crested Bellbird	Colluricinclidae	0	0	0	1	107.986	1.79898	80	5	0.41162	0.00870885	0	1
Pitohui_cristatus	Pitohui cristatus	Crested Pitohui	Colluricinclidae	0	0	NA	1	10.1204	1.89763	80	75	0.151374	0.000648563	0	1
Pitohui_dichrous	Pitohui dichrous	Hooded Pitohui	Colluricinclidae	0	0	0	1	14.4569	1.96802	0	75	0.154017	0.000564814	0	1
Pitohui_ferrugineus	Pitohui ferrugineus	Rusty Pitohui	Colluricinclidae	0	0	0	1	11.9999	1.97313	0	76	0.172723	0.000690002	0	1
Pitohui_incertus	Pitohui incertus	White-bellied Pitohui	Colluricinclidae	0	0	NA	1	19.6015	1.87506	0	57	0.13968	0.000798723	0	1
Pitohui_kirhocephalus	Pitohui kirhocephalus	Variable Pitohui	Colluricinclidae	0	0	NA	1	69.3016	1.85733	0	76	0.161859	0.000700693	0	1
Pitohui_nigrescens	Pitohui nigrescens	Black Pitohui	Colluricinclidae	0	0	NA	1	69.794	1.88593	20	62.5	0.155189	0.000571835	0	0
Conopophaga_ardesiaca	Conopophaga ardesiaca	Slaty Gnateater	Conopophagidae	0	0	NA	1	74.8933	1.41996	60	63.5	0.37272	0.00252798	0	1
Conopophaga_aurita	Conopophaga aurita	Chestnut-belted Gnateater	Conopophagidae	0	0	0	1	57.9743	1.42325	60	78	0.292637	0.000711123	0	1
Conopophaga_castaneiceps	Conopophaga castaneiceps	Chestnut-crowned Gnateater	Conopophagidae	0	0	NA	1	56.4239	1.43136	60	69	0.226284	0.000790339	0	0
Conopophaga_cearae	Conopophaga cearae	Ceara Gnateater	Conopophagidae	0	0	NA	NA	NA	1.34242	60	NA	NA	NA	NA	NA
Conopophaga_lineata	Conopophaga lineata	Rufous Gnateater	Conopophagidae	0	0	0	1	31.3342	1.40824	60	31	0.419839	0.00292561	0	1
Conopophaga_melanogaster	Conopophaga melanogaster	Black-bellied Gnateater	Conopophagidae	0	0	NA	1	111.858	1.62839	60	79	0.43645	0.000857187	0	0
Conopophaga_melanops	Conopophaga melanops	Black-cheeked Gnateater	Conopophagidae	0	0	0	1	66.6666	1.3032	60	26	0.325	0.00258158	0	1
Conopophaga_peruviana	Conopophaga peruviana	Ash-throated Gnateater	Conopophagidae	0	0	NA	1	66.8355	1.36173	60	80	0.255408	0.000683047	0	1
Conopophaga_roberti	Conopophaga roberti	Hooded Gnateater	Conopophagidae	0	0	0	1	132.866	1.31806	60	31	0.620438	0.00156794	0	1
Corcorax_melanorhamphos	Corcorax melanorhamphos	White-winged Chough	Corcoracidae	0	0	0	1	13.9514	2.5611	90	12	0.326645	0.00791559	0	2
Struthidea_cinerea	Struthidea cinerea	Apostlebird	Corcoracidae	0	0	0	1	24.3344	2.12057	90	10	0.412778	0.0078986	0	2
Aphelocoma_californica	Aphelocoma californica	Western Scrub-jay	Corvidae	0	0	0	1	34.1142	1.91032	80	5	0.381985	0.0120081	0	3
Aphelocoma_coerulescens	Aphelocoma coerulescens	Florida Scrub-jay	Corvidae	0	0	0	1	33.4545	1.88734	80	20	0.296022	0.00615663	0	3
Aphelocoma_insularis	Aphelocoma insularis	Island Scrub-jay	Corvidae	0	0	0	1	24.9301	2.06446	80	0	0.634925	0.00764156	0	1
Aphelocoma_ultramarina	Aphelocoma ultramarina	Mexican Jay	Corvidae	0	0	0	1	22.1037	2.10838	60	18	0.529891	0.0062318	0	3
Aphelocoma_unicolor	Aphelocoma unicolor	Unicoloured Jay	Corvidae	0	0	0	1	8.81962	2.09342	40	49	0.391873	0.00234161	0	1
Calocitta_colliei	Calocitta colliei	Black-throated Magpie-jay	Corvidae	0	0	NA	1	27.6483	2.36922	0	42.5	0.781859	0.00468173	0	1
Calocitta_formosa	Calocitta formosa	White-throated Magpie-jay	Corvidae	0	0	0	1	19.5797	2.32222	20	38	0.692869	0.00149444	0	2
Cissa_chinensis	Cissa chinensis	Green Magpie	Corvidae	0	0	0	1	24.3278	2.10295	30	34	0.526062	0.00435409	0	1
Cissa_hypoleuca	Cissa hypoleuca	Yellow-breasted Magpie	Corvidae	0	0	0	1	15.5804	2.09691	30	27	0.537468	0.00327807	0	1
Cissa_thalassina	Cissa thalassina	Short-tailed Magpie	Corvidae	0	0	NA	1	26.1988	2.09691	50	50	0.202888	0.000586315	0	1
Corvus_albicollis	Corvus albicollis	White-necked Raven	Corvidae	0	0	0	1	16.8458	2.95134	60	25	0.630758	0.00362453	0	2
Corvus_albus	Corvus albus	Pied Crow	Corvidae	0	0	0	1	24.2268	2.71933	60	19	0.649337	0.00268786	0	2
Corvus_bennetti	Corvus bennetti	Little Crow	Corvidae	0	0	0	1	26.4707	2.58995	90	5	0.431949	0.00878931	1	1
Corvus_brachyrhynchos	Corvus brachyrhynchos	American Crow	Corvidae	0	0	0	1	20.5732	2.69557	80	32	0.247303	0.0151589	1	3
Corvus_capensis	Corvus capensis	Cape Crow	Corvidae	0	0	0	1	34.979	2.74273	90	5	0.717655	0.00579677	0	2
Corvus_caurinus	Corvus caurinus	North-western Crow	Corvidae	0	0	0	1	52.5861	2.59273	80	20	0.223967	0.00986637	0	3
Corvus_corax	Corvus corax	Common Raven	Corvidae	0	0	0	1	25.3817	2.97359	80	6	0.26667	0.0189029	0	3
Corvus_corone	Corvus corone	Carrion Crow	Corvidae	0	0	0	1	44.8779	2.75587	90	9	0.25515	0.0195398	1	3
Corvus_coronoides	Corvus coronoides	Australian Raven	Corvidae	0	0	0	1	32.1721	2.80956	100	5	0.343205	0.00820847	0	2
Corvus_crassirostris	Corvus crassirostris	Thick-billed Raven	Corvidae	0	0	0	1	8.48207	3.055	80	12	0.521915	0.00186964	0	1
Corvus_cryptoleucus	Corvus cryptoleucus	Chihuahuan Raven	Corvidae	0	0	0	1	45.4926	2.72754	90	5	0.408271	0.0102177	1	2
Corvus_dauuricus	Corvus dauuricus	Daurian Jackdaw	Corvidae	0	0	0	1	26.867	2.31806	50	13	0.524932	0.0224198	1	2
Corvus_edithae	Corvus edithae	Somali Crow	Corvidae	0	0	0	1	22.5728	2.64542	60	5	0.501787	0.00170878	0	1
Corvus_enca	Corvus enca	Slender-billed Crow	Corvidae	0	0	0	1	34.5493	2.39967	20	50.5	0.183153	0.000566111	0	1
Corvus_florensis	Corvus florensis	Flores Crow	Corvidae	0	0	NA	1	15.7102	2.24304	40	7	0.506006	0.000972955	0	0
Corvus_frugilegus	Corvus frugilegus	Rook	Corvidae	0	0	0	1	38.4188	2.65658	90	13	0.248884	0.0179767	1	3
Corvus_fuscicapillus	Corvus fuscicapillus	Brown-headed Crow	Corvidae	0	0	NA	1	27.9189	2.70058	0	79.5	0.164476	0.000511951	0	1
Corvus_hawaiiensis	Corvus hawaiiensis	Hawaiian Crow	Corvidae	0	0	0	1	19.1022	2.716	50	0	0.198235	0.00196483	0	2
Corvus_imparatus	Corvus imparatus	Tamaulipas Crow	Corvidae	0	0	NA	1	37.8452	2.34439	70	17	0.37639	0.00566489	1	1
Corvus_jamaicensis	Corvus jamaicensis	Jamaican Crow	Corvidae	0	0	NA	1	15.8984	2.52892	0	29	0.261546	0.00158112	0	1
Corvus_kubaryi	Corvus kubaryi	Mariana Crow	Corvidae	0	0	0	1	18.3202	2.39794	20	0	0.145605	NA	0	2
Corvus_leucognaphalus	Corvus leucognaphalus	White-necked Crow	Corvidae	0	0	NA	1	17.2961	2.70058	10	24	0.234319	0.00190056	0	1
Corvus_levaillantii	Corvus levaillantii	Jungle Crow	Corvidae	0	0	NA	NA	NA	2.71024	100	NA	NA	NA	NA	1
Corvus_macrorhynchos	Corvus macrorhynchos	Large-billed Crow	Corvidae	0	0	0	1	23.899	2.71328	100	16	0.529871	0.00953371	0	3
Corvus_meeki	Corvus meeki	Bougainville Crow	Corvidae	0	0	NA	1	26.3228	2.70058	0	59	0.131162	0.000616032	0	0
Corvus_mellori	Corvus mellori	Little Raven	Corvidae	0	0	0	1	15.0168	2.7332	60	8.5	0.300174	0.00847761	0	2
Corvus_minutus	Corvus minutus	Cuban Palm Crow	Corvidae	0	0	NA	NA	NA	2.45912	50	NA	NA	NA	NA	NA
Corvus_monedula	Corvus monedula	Eurasian Jackdaw	Corvidae	0	0	0	1	25.2488	2.39094	50	5	0.22279	0.0160965	1	3
Corvus_moneduloides	Corvus moneduloides	New Caledonian Crow	Corvidae	0	0	NA	1	35.4205	2.4456	50	46	0.31715	0.00324406	0	2
Corvus_nasicus	Corvus nasicus	Cuban Crow	Corvidae	0	0	NA	1	40.8868	2.60314	40	14	0.324194	0.00271714	0	1
Corvus_orru	Corvus orru	Torresian Crow	Corvidae	0	0	0	1	40.5977	2.70899	70	7	0.516511	0.0063672	0	2
Corvus_ossifragus	Corvus ossifragus	Fish Crow	Corvidae	0	0	0	1	26.3836	2.45484	90	45	0.173622	0.0111655	0	3
Corvus_palmarum	Corvus palmarum	Palm Crow	Corvidae	0	0	NA	1	20.3618	2.4609	50	19	0.270559	0.00226225	0	1
Corvus_rhipidurus	Corvus rhipidurus	Fan-tailed Raven	Corvidae	0	0	0	1	37.5085	2.78604	80	0	0.439489	0.00600336	0	1
Corvus_ruficollis	Corvus ruficollis	Brown-necked Raven	Corvidae	0	0	0	1	25.1401	2.74741	60	0	0.315983	0.0102895	0	2
Corvus_sinaloae	Corvus sinaloae	Sinaloa Crow	Corvidae	0	0	NA	1	32.8193	2.38739	70	45	0.751154	0.00551877	0	1
Corvus_splendens	Corvus splendens	House Crow	Corvidae	0	0	0	1	11.2173	2.46761	60	7	0.701455	0.00602377	0	3
Corvus_tasmanicus	Corvus tasmanicus	Forest Raven	Corvidae	0	0	0	1	21.0319	2.83164	70	58	0.197292	0.00554073	0	2
Corvus_torquatus	Corvus torquatus	Collared Crow	Corvidae	0	0	0	1	11.2967	2.67302	100	11	0.421483	0.0118286	0	1
Corvus_tristis	Corvus tristis	Grey Crow	Corvidae	0	0	NA	1	37.5275	2.80277	20	74.5	0.161527	0.000620739	0	1
Corvus_typicus	Corvus typicus	Piping Crow	Corvidae	0	0	NA	1	39.0836	2.24304	40	57	0.222487	0.000570388	0	0
Corvus_unicolor	Corvus unicolor	Banggai Crow	Corvidae	0	0	NA	1	24.7393	2.24304	40	45	0.235468	0.00063602	0	1
Corvus_validus	Corvus validus	Long-billed Crow	Corvidae	0	0	NA	1	16.4078	2.47712	10	73	0.18965	0.000390122	0	0
Corvus_woodfordi	Corvus woodfordi	White-billed Crow	Corvidae	0	0	NA	1	31.9528	2.66932	0	59	0.131162	0.000616032	0	0
Crypsirina_cucullata	Crypsirina cucullata	Hooded Treepie	Corvidae	0	0	NA	1	13.9246	2.12222	0	50	0.709378	0.00503625	0	0
Crypsirina_temia	Crypsirina temia	Racket-tailed Treepie	Corvidae	0	0	NA	1	6.14681	2.11227	0	30	0.612925	0.00232892	0	1
Cyanocitta_cristata	Cyanocitta cristata	Blue Jay	Corvidae	0	0	0	1	13.5345	1.94448	40	33	0.208903	0.0151108	1	3
Cyanocitta_stelleri	Cyanocitta stelleri	Steller's Jay	Corvidae	0	0	0	1	24.7108	2.10721	40	26.5	0.301382	0.012357	0	3
Cyanocorax_affinis	Cyanocorax affinis	Black-chested Jay	Corvidae	0	0	NA	1	14.0714	2.32634	20	24	0.333412	0.000692351	0	1
Cyanocorax_beecheii	Cyanocorax beecheii	Purplish-backed Jay	Corvidae	0	0	0	1	10.5685	2.28556	40	45	0.77427	0.00523654	0	0
Cyanocorax_caeruleus	Cyanocorax caeruleus	Azure Jay	Corvidae	0	0	NA	1	12.3603	2.43457	0	53	0.177284	0.00538892	0	1
Cyanocorax_cayanus	Cyanocorax cayanus	Cayenne Jay	Corvidae	0	0	NA	1	10.7944	2.24304	0	76	0.29708	0.000933055	0	1
Cyanocorax_chrysops	Cyanocorax chrysops	Plush-crested Jay	Corvidae	0	0	NA	1	12.2032	2.22011	10	47	0.396653	0.00411306	0	2
Cyanocorax_cristatellus	Cyanocorax cristatellus	Curl-crested Jay	Corvidae	0	0	NA	1	16.6413	2.25042	60	36.5	0.679051	0.00163763	0	1
Cyanocorax_cyanomelas	Cyanocorax cyanomelas	Purplish Jay	Corvidae	0	0	NA	1	14.928	2.31597	20	49	0.402577	0.00261079	0	1
Cyanocorax_cyanopogon	Cyanocorax cyanopogon	White-naped Jay	Corvidae	0	0	NA	1	11.6518	2.16435	10	31	0.695122	0.00166249	0	1
Cyanocorax_dickeyi	Cyanocorax dickeyi	Tufted Jay	Corvidae	0	0	0	1	10.535	2.25768	10	34	0.771389	0.00361906	0	1
Cyanocorax_heilprini	Cyanocorax heilprini	Azure-naped Jay	Corvidae	0	0	NA	1	17.8619	2.21822	20	79	0.165093	0.000515531	0	0
Cyanocorax_luxuosus	Cyanocorax luxuosus	Green Jay	Corvidae	0	0	NA	NA	NA	1.89487	0	NA	NA	NA	NA	NA
Cyanocorax_melanocyaneus	Cyanocorax melanocyaneus	Bushy-crested Jay	Corvidae	0	0	0	1	9.53402	2.00432	30	64	0.284293	0.00182867	0	0
Cyanocorax_morio	Cyanocorax morio	Brown Jay	Corvidae	0	0	0	1	10.6415	2.30963	30	59	0.3214	0.00253332	0	NA
Cyanocorax_mystacalis	Cyanocorax mystacalis	White-tailed Jay	Corvidae	0	0	NA	1	23.4819	2.18893	30	5	0.518496	0.00146934	0	1
Cyanocorax_sanblasianus	Cyanocorax sanblasianus	San Blas Jay	Corvidae	0	0	0	1	16.4907	2.03743	30	39.5	0.797166	0.00230282	0	1
Cyanocorax_violaceus	Cyanocorax violaceus	Violaceous Jay	Corvidae	0	0	NA	1	7.17499	2.4183	0	78.5	0.244756	0.000733542	0	0
Cyanocorax_yncas	Cyanocorax yncas	Green Jay	Corvidae	0	0	0	1	21.0708	1.89487	0	44	0.333976	0.00138718	0	2
Cyanocorax_yucatanicus	Cyanocorax yucatanicus	Yucatan Jay	Corvidae	0	0	0	1	15.0069	2.07188	30	65.5	0.340684	0.00271391	0	1
Cyanolyca_argentigula	Cyanolyca argentigula	Silvery-throated Jay	Corvidae	0	0	NA	1	7.31653	2.30103	0	53	0.343102	0.000767785	0	0
Cyanolyca_armillata	Cyanolyca armillata	Black-collared Jay	Corvidae	0	0	NA	1	5.80598	2.30103	0	24.5	0.250131	0.000587799	0	0
Cyanolyca_cucullata	Cyanolyca cucullata	Azure-hooded Jay	Corvidae	0	0	NA	1	18.2209	2.00689	0	54.5	0.33306	0.00235929	0	1
Cyanolyca_mirabilis	Cyanolyca mirabilis	White-throated Jay	Corvidae	0	0	NA	1	27.3262	1.71933	0	41	0.694797	0.00200572	0	0
Cyanolyca_nana	Cyanolyca nana	Dwarf Jay	Corvidae	0	0	0	1	21.6268	1.61278	0	40	0.510383	0.00234861	0	1
Cyanolyca_pulchra	Cyanolyca pulchra	Beautiful Jay	Corvidae	0	0	NA	1	11.3965	2.01691	0	10	0.204173	0.000536915	0	0
Cyanolyca_pumilo	Cyanolyca pumilo	Black-throated Jay	Corvidae	0	0	NA	1	15.7714	1.6721	0	42	0.405683	0.00164785	0	0
Cyanolyca_turcosa	Cyanolyca turcosa	Turquoise Jay	Corvidae	0	0	NA	1	6.94506	2.01691	0	68	0.176746	0.000717423	0	1
Cyanolyca_viridicyanus	Cyanolyca viridicyanus	White-collared Jay	Corvidae	0	0	NA	1	5.39919	2.07918	0	43	0.345371	0.00136749	0	0
Cyanopica_cyanus	Cyanopica cyanus	Azure-winged Magpie	Corvidae	0	0	0	1	16.2542	1.98227	0	11	0.505316	0.0205133	0	2
Dendrocitta_bayleyi	Dendrocitta bayleyi	Andaman Treepie	Corvidae	0	0	0	1	33.1591	2.01072	30	0	0.625155	0.00097633	0	1
Dendrocitta_formosae	Dendrocitta formosae	Grey Treepie	Corvidae	0	0	0	1	16.5437	2.01599	30	23	0.474892	0.0091144	0	1
Dendrocitta_frontalis	Dendrocitta frontalis	Collared Treepie	Corvidae	0	0	NA	1	29.224	2	20	5	0.604872	0.00963089	0	1
Dendrocitta_leucogastra	Dendrocitta leucogastra	White-bellied Treepie	Corvidae	0	0	NA	1	14.3701	1.99651	10	11	0.669605	0.00231589	0	1
Dendrocitta_occipitalis	Dendrocitta occipitalis	Sunda Treepie	Corvidae	0	0	NA	1	34.1231	1.97909	10	20.5	0.165248	0.000569939	0	0
Dendrocitta_vagabunda	Dendrocitta vagabunda	Rufous Treepie	Corvidae	0	0	0	1	28.8215	2	10	12	0.711967	0.00549745	0	2
Garrulus_glandarius	Garrulus glandarius	Eurasian Jay	Corvidae	0	0	0	1	28.0467	2.22013	60	27	0.277285	0.0152193	0	3
Garrulus_lanceolatus	Garrulus lanceolatus	Black-headed Jay	Corvidae	0	0	0	1	23.3837	1.98989	50	5	0.331939	0.0130529	0	1
Garrulus_lidthi	Garrulus lidthi	Amami Jay	Corvidae	0	0	0	1	7.8812	2.09691	0	18	0.186421	0.00644378	0	1
Gymnorhinus_cyanocephalus	Gymnorhinus cyanocephalus	Pinyon Jay	Corvidae	0	0	0	1	14.1188	2.02119	20	5	0.291045	0.0138781	0	2
Nucifraga_caryocatactes	Nucifraga caryocatactes	Spotted Nutcracker	Corvidae	0	0	0	1	30.1967	2.23981	40	25	0.275469	0.0215029	0	3
Nucifraga_columbiana	Nucifraga columbiana	Clark's Nutcracker	Corvidae	0	0	0	1	19.3213	2.11394	60	10	0.260183	0.0135289	0	3
Perisoreus_canadensis	Perisoreus canadensis	Grey Jay	Corvidae	0	0	0	1	15.3414	1.85552	60	38	0.244841	0.0203033	0	3
Perisoreus_infaustus	Perisoreus infaustus	Siberian Jay	Corvidae	0	0	0	1	20.4428	1.92634	40	33	0.234663	0.0233018	0	3
Perisoreus_internigrans	Perisoreus internigrans	Sichuan Jay	Corvidae	0	0	0	1	13.0927	2.0086	0	25	0.611574	0.0110323	0	1
Pica_hudsonia	Pica hudsonia	Black-billed Magpie	Corvidae	0	0	0	1	33.774	2.2492	70	7.5	0.274189	0.0149227	0	NA
Pica_nuttalli	Pica nuttalli	Yellow-billed Magpie	Corvidae	0	0	0	1	21.1073	2.2014	70	21.5	0.672565	0.0102314	0	2
Pica_pica	Pica pica	Black-billed Magpie	Corvidae	0	0	0	1	21.785	2.31551	70	11	0.263887	0.0159599	0	3
Platylophus_galericulatus	Platylophus galericulatus	Crested Jay	Corvidae	0	0	NA	1	15.5246	1.89154	0	53	0.1741	0.000557462	0	1
Platysmurus_leucopterus	Platysmurus leucopterus	Black Magpie	Corvidae	0	0	NA	1	9.55666	2.25527	0	50	0.17161	0.000557722	0	1
Podoces_biddulphi	Podoces biddulphi	Xinjiang Ground-jay	Corvidae	0	0	NA	1	21.2752	2.11561	100	0	0.2588	0.0190463	0	1
Podoces_hendersoni	Podoces hendersoni	Mongolian Ground-jay	Corvidae	0	0	0	1	18.5163	2.08099	100	5	0.317234	0.0210163	0	1
Podoces_panderi	Podoces panderi	Turkestan Ground-jay	Corvidae	0	0	0	1	23.245	1.95952	100	2	0.409531	0.0181962	0	1
Podoces_pleskei	Podoces pleskei	Iranian Ground-jay	Corvidae	0	0	0	1	18.1733	1.94201	100	0	0.48853	0.0143505	0	1
Ptilostomus_afer	Ptilostomus afer	Piapiac	Corvidae	0	0	0	1	32.5659	2.10721	70	17	0.855748	0.00274497	0	1
Pyrrhocorax_graculus	Pyrrhocorax graculus	Yellow-billed Chough	Corvidae	0	0	0	1	30.7215	2.32531	90	5	0.430046	0.0132568	0	3
Pyrrhocorax_pyrrhocorax	Pyrrhocorax pyrrhocorax	Red-billed Chough	Corvidae	0	0	0	1	34.6975	2.44406	70	5	0.481512	0.0145909	0	3
Temnurus_temnurus	Temnurus temnurus	Ratchet-tailed Treepie	Corvidae	0	0	NA	1	12.6418	2.13988	0	34	0.489487	0.00408103	0	1
Urocissa_caerulea	Urocissa caerulea	Taiwan Magpie	Corvidae	0	0	0	1	12.2767	2.40993	10	14	0.362867	0.0067064	0	1
Urocissa_erythrorhyncha	Urocissa erythrorhyncha	Blue Magpie	Corvidae	0	0	0	1	11.127	2.18184	30	20	0.508685	0.00922871	0	2
Urocissa_flavirostris	Urocissa flavirostris	Gold-billed Magpie	Corvidae	0	0	0	1	38.8594	2.17319	30	26	0.530924	0.00776116	0	1
Urocissa_ornata	Urocissa ornata	Sri Lanka Magpie	Corvidae	0	0	NA	1	13.7636	2.29226	10	19	0.362191	0.00151941	0	1
Urocissa_whiteheadi	Urocissa whiteheadi	White-winged Magpie	Corvidae	0	0	NA	1	25.3396	2.30103	30	22	0.483247	0.00701488	0	1
Zavattariornis_stresemanni	Zavattariornis stresemanni	Ethiopian Bush-crow	Corvidae	0	0	0	1	21.3614	2.04139	40	15	0.456707	0.0016702	0	1
Ampelioides_tschudii	Ampelioides tschudii	Scaled Fruiteater	Cotingidae	0	0	0	1	84.6206	1.89432	0	49	0.276364	0.000849194	0	1
Ampelion_rubrocristatus	Ampelion rubrocristatus	Red-crested Cotinga	Cotingidae	0	0	0	1	12.5027	1.82151	0	24	0.303261	0.00074068	1	0
Ampelion_rufaxilla	Ampelion rufaxilla	Chestnut-crested Cotinga	Cotingidae	0	0	0	1	11.7154	1.86864	0	44	0.312827	0.00101526	0	0
Calyptura_cristata	Calyptura cristata	Kinglet Calyptura	Cotingidae	0	0	NA	1	30.8538	0.69897	0	78	0.329841	0.00314372	0	1
Carpodectes_antoniae	Carpodectes antoniae	Yellow-billed Cotinga	Cotingidae	0	0	3	0	130.282	1.99123	0	41.5	0.338993	0.000762942	0	1
Carpodectes_hopkei	Carpodectes hopkei	Black-tipped Cotinga	Cotingidae	0	0	3	0	162.606	2.0086	0	47.5	0.184322	0.000541873	0	0
Carpodectes_nitidus	Carpodectes nitidus	Snowy Cotinga	Cotingidae	0	0	3	0	101.119	2.01072	0	71	0.282519	0.00103251	0	1
Carpornis_cucullata	Carpornis cucullata	Hooded Berryeater	Cotingidae	0	0	0	1	36.0285	1.8704	0	49	0.284117	0.00383452	0	0
Carpornis_melanocephala	Carpornis melanocephala	Black-headed Berryeater	Cotingidae	0	0	0	1	19.002	1.80754	0	31	0.287765	0.00254753	0	0
Cephalopterus_glabricollis	Cephalopterus glabricollis	Bare-necked Umbrellabird	Cotingidae	0	0	3	0	46.962	2.58546	0	39	0.343102	0.000811364	0	1
Cephalopterus_ornatus	Cephalopterus ornatus	Amazonian Umbrellabird	Cotingidae	0	0	3	0	25.9262	2.57978	0	79	0.331491	0.000827023	0	1
Cephalopterus_penduliger	Cephalopterus penduliger	Long-wattled Umbrellabird	Cotingidae	0	0	3	0	29.6482	2.52892	30	10	0.315269	0.000616516	0	1
Conioptilon_mcilhennyi	Conioptilon mcilhennyi	Black-faced Cotinga	Cotingidae	0	0	0	1	31.9424	1.95424	0	80	0.371992	0.000869508	0	1
Cotinga_amabilis	Cotinga amabilis	Lovely Cotinga	Cotingidae	0	0	3	0	155.398	1.85431	20	70	0.29988	0.00236059	0	0
Cotinga_cayana	Cotinga cayana	Spangled Cotinga	Cotingidae	0	0	3	0	153.221	1.79099	0	78	0.31688	0.000832484	0	1
Cotinga_cotinga	Cotinga cotinga	Purple-breasted Cotinga	Cotingidae	0	0	3	0	74.4589	1.73239	0	75	0.309917	0.000918863	0	1
Cotinga_maculata	Cotinga maculata	Banded Cotinga	Cotingidae	0	0	3	0	119.728	1.81291	0	28	0.261513	0.00257268	0	1
Cotinga_maynana	Cotinga maynana	Plum-throated Cotinga	Cotingidae	0	0	3	0	175.861	1.83885	0	79	0.237223	0.000663746	0	0
Cotinga_nattererii	Cotinga nattererii	Blue Cotinga	Cotingidae	0	0	3	0	147.818	1.80706	0	56	0.253521	0.000599819	0	0
Cotinga_ridgwayi	Cotinga ridgwayi	Turquoise Cotinga	Cotingidae	0	0	3	0	154.525	1.75815	0	48.5	0.338993	0.000768518	0	1
Doliornis_remseni	Doliornis remseni	Chestnut-bellied Cotinga	Cotingidae	0	0	0	1	10.5962	1.80003	0	17	0.192365	0.0006202	0	1
Doliornis_sclateri	Doliornis sclateri	Bay-vented Cotinga	Cotingidae	0	0	0	1	43.0465	1.7796	0	50.5	0.316435	0.00110434	0	1
Gymnoderus_foetidus	Gymnoderus foetidus	Bare-necked Fruitcrow	Cotingidae	0	0	0	0	40.3698	2.45102	0	78	0.384349	0.000891369	0	1
Haematoderus_militaris	Haematoderus militaris	Crimson Fruitcrow	Cotingidae	0	0	3	0	42.1672	2.35603	0	74	0.314037	0.0010528	0	1
Iodopleura_fusca	Iodopleura fusca	Dusky Purpletuft	Cotingidae	0	0	0	1	26.4523	1.18469	0	70	0.243778	0.000820169	0	1
Iodopleura_isabellae	Iodopleura isabellae	White-browed Purpletuft	Cotingidae	0	0	0	1	19.152	1.30103	0	79	0.324255	0.000787164	0	1
Iodopleura_pipra	Iodopleura pipra	Buff-throated Purpletuft	Cotingidae	0	0	0	1	18.8111	1.00217	0	26	0.377945	0.00301408	0	1
Laniisoma_buckleyi	Laniisoma buckleyi	Andean Laniisoma	Cotingidae	0	0	NA	NA	NA	1.67302	50	NA	NA	NA	NA	NA
Laniisoma_elegans	Laniisoma elegans	Shrike-like Cotinga	Cotingidae	0	0	NA	1	30.9687	1.67578	50	32	0.370297	0.00276	0	1
Laniocera_hypopyrra	Laniocera hypopyrra	Cinereous Mourner	Cotingidae	0	0	3	0	25.214	1.70757	0	78	0.322156	0.000849569	0	1
Laniocera_rufescens	Laniocera rufescens	Speckled Mourner	Cotingidae	0	0	3	0	18.3527	1.68215	0	57	0.290187	0.000749565	0	1
Lipaugus_fuscocinereus	Lipaugus fuscocinereus	Dusky Piha	Cotingidae	0	0	3	0	6.95054	2.13988	0	24	0.204482	0.000562727	0	1
Lipaugus_lanioides	Lipaugus lanioides	Cinnamon-vented Piha	Cotingidae	0	0	3	0	5.70669	1.97681	0	41	0.405898	0.00323013	0	1
Lipaugus_streptophorus	Lipaugus streptophorus	Rose-collared Piha	Cotingidae	0	0	3	0	45.4815	1.7574	0	71	0.298911	0.000673778	0	0
Lipaugus_unirufus	Lipaugus unirufus	Rufous Piha	Cotingidae	0	0	3	0	9.86548	1.91434	20	57	0.292396	0.000787119	0	1
Lipaugus_uropygialis	Lipaugus uropygialis	Scimitar-winged Piha	Cotingidae	0	0	3	0	12.2873	2.06446	0	43	0.359585	0.00252798	0	1
Lipaugus_vociferans	Lipaugus vociferans	Screaming Piha	Cotingidae	0	0	3	0	9.97948	1.87493	0	78	0.338683	0.000875431	0	1
Lipaugus_weberi	Lipaugus weberi	Chestnut-capped Piha	Cotingidae	0	0	3	0	16.7683	1.85794	0	30	0.186778	0.000641257	0	1
Oxyruncus_cristatus	Oxyruncus cristatus	Sharpbill	Cotingidae	0	0	3	0	35.2662	1.62325	0	56	0.334459	0.001454	0	1
Pachyramphus_aglaiae	Pachyramphus aglaiae	Rose-throated Becard	Cotingidae	0	0	0	1	98.0226	1.47276	0	42	0.478681	0.00272446	1	1
Pachyramphus_albogriseus	Pachyramphus albogriseus	Black-and-white Becard	Cotingidae	0	0	0	1	93.9726	1.23805	0	27	0.320098	0.000774013	0	0
Pachyramphus_castaneus	Pachyramphus castaneus	Chestnut-crowned Becard	Cotingidae	0	0	0	1	15.9348	1.29003	0	74	0.328023	0.000949056	0	1
Pachyramphus_cinnamomeus	Pachyramphus cinnamomeus	Cinnamon Becard	Cotingidae	0	0	0	1	17.5746	1.3075	0	34	0.308928	0.000821698	0	1
Pachyramphus_homochrous	Pachyramphus homochrous	One-coloured Becard	Cotingidae	0	0	NA	1	126.675	1.57171	0	22.5	0.362471	0.000614548	0	0
Pachyramphus_major	Pachyramphus major	Grey-collared Becard	Cotingidae	0	0	0	1	91.1728	1.39445	0	49.5	0.422179	0.00275785	0	1
Pachyramphus_marginatus	Pachyramphus marginatus	Black-capped Becard	Cotingidae	0	0	NA	1	132.286	1.266	0	78	0.316748	0.000846113	0	0
Pachyramphus_minor	Pachyramphus minor	Pink-throated Becard	Cotingidae	0	0	0	1	147.069	1.56348	0	78	0.338649	0.00086678	0	0
Pachyramphus_niger	Pachyramphus niger	Jamaican Becard	Cotingidae	0	0	NA	1	158.898	1.60423	0	29	0.261546	0.00158112	0	1
Pachyramphus_polychopterus	Pachyramphus polychopterus	White-winged Becard	Cotingidae	0	0	0	1	110.71	1.31806	0	55	0.392136	0.001263	0	1
Pachyramphus_rufus	Pachyramphus rufus	Cinereous Becard	Cotingidae	0	0	0	1	121.298	1.27416	0	75	0.335978	0.000850277	0	1
Pachyramphus_spodiurus	Pachyramphus spodiurus	Slaty Becard	Cotingidae	0	0	0	1	120.879	1.26007	25	12	0.564743	0.00104998	0	1
Pachyramphus_surinamus	Pachyramphus surinamus	Glossy-backed Becard	Cotingidae	0	0	NA	1	70.0653	1.29557	0	75	0.319361	0.00113291	0	1
Pachyramphus_validus	Pachyramphus validus	Crested Becard	Cotingidae	0	0	0	1	93.1276	1.63347	0	38	0.559736	0.00192595	0	1
Pachyramphus_versicolor	Pachyramphus versicolor	Barred Becard	Cotingidae	0	0	0	1	95.9937	1.19033	0	43	0.272605	0.0007562	0	1
Pachyramphus_viridis	Pachyramphus viridis	Green-backed Becard	Cotingidae	0	0	0	1	48.8756	1.32222	0	34	0.517724	0.00227082	0	1
Pachyramphus_xanthogenys	Pachyramphus xanthogenys	Yellow-cheeked Becard	Cotingidae	0	0	NA	1	63.9605	1.38775	0	77	0.21351	0.000876286	0	NA
Perissocephalus_tricolor	Perissocephalus tricolor	Capuchinbird	Cotingidae	0	0	3	0	17.7285	2.53084	0	76	0.290751	0.000935469	0	1
Phibalura_flavirostris	Phibalura flavirostris	Swallow-tailed Cotinga	Cotingidae	0	0	0	1	50.2653	1.66745	0	41	0.272334	0.0038382	1	1
Phoenicircus_carnifex	Phoenicircus carnifex	Guianan Red-cotinga	Cotingidae	0	0	3	0	61.0646	1.92247	0	74	0.325678	0.000983649	0	0
Phoenicircus_nigricollis	Phoenicircus nigricollis	Black-necked Red-cotinga	Cotingidae	0	0	3	0	98.3228	1.98453	0	79	0.168406	0.000714616	0	1
Phytotoma_raimondii	Phytotoma raimondii	Peruvian Plantcutter	Cotingidae	0	0	0	1	85.0538	1.59988	0	5	0.406285	0.00141896	0	1
Phytotoma_rara	Phytotoma rara	Rufous-tailed Plantcutter	Cotingidae	0	0	0	1	57.7632	1.6721	40	24	0.305958	0.00627236	1	1
Phytotoma_rutila	Phytotoma rutila	White-tipped Plantcutter	Cotingidae	0	0	0	1	92.4737	1.60746	20	32	0.50312	0.00724764	1	1
Pipreola_arcuata	Pipreola arcuata	Barred Fruiteater	Cotingidae	0	0	0	1	68.2838	2.07188	0	42	0.298241	0.000895618	0	1
Pipreola_aureopectus	Pipreola aureopectus	Golden-breasted Fruiteater	Cotingidae	0	0	0	1	69.974	1.66276	0	13	0.252995	0.000621093	0	0
Pipreola_chlorolepidota	Pipreola chlorolepidota	Fiery-throated Fruiteater	Cotingidae	0	0	0	1	47.5501	1.46982	0	75.5	0.205494	0.000868303	0	1
Pipreola_formosa	Pipreola formosa	Handsome Fruiteater	Cotingidae	0	0	0	1	91.1931	1.67394	0	33	0.442383	0.000848041	0	0
Pipreola_frontalis	Pipreola frontalis	Scarlet-breasted Fruiteater	Cotingidae	0	0	0	1	74.8834	1.62737	0	71	0.316686	0.00123114	0	1
Pipreola_intermedia	Pipreola intermedia	Band-tailed Fruiteater	Cotingidae	0	0	0	1	74.2834	1.69845	0	50.5	0.336058	0.00161592	0	0
Pipreola_jucunda	Pipreola jucunda	Orange-breasted Fruiteater	Cotingidae	0	0	0	1	91.7606	1.7653	0	11.5	0.233427	0.000587406	0	1
Pipreola_lubomirskii	Pipreola lubomirskii	Black-chested Fruiteater	Cotingidae	0	0	0	1	124.613	1.74178	0	23	0.222458	0.000601499	0	1
Pipreola_pulchra	Pipreola pulchra	Masked Fruiteater	Cotingidae	0	0	0	1	87.5573	1.76492	0	51	0.319148	0.00110302	0	0
Pipreola_riefferii	Pipreola riefferii	Green-and-black Fruiteater	Cotingidae	0	0	0	1	86.0025	1.69285	0	24	0.246646	0.00067312	0	1
Pipreola_whitelyi	Pipreola whitelyi	Red-banded Fruiteater	Cotingidae	0	0	0	1	74.1577	1.69897	0	69	0.238947	0.000688584	0	0
Porphyrolaema_porphyrolaema	Porphyrolaema porphyrolaema	Purple-throated Cotinga	Cotingidae	0	0	3	1	138.6	1.77815	0	79	0.257244	0.000648774	0	1
Procnias_albus	Procnias albus	White Bellbird	Cotingidae	0	0	3	0	255.864	2.32222	0	77	0.288153	0.000875127	0	0
Procnias_averano	Procnias averano	Bearded Bellbird	Cotingidae	0	0	3	0	158.385	2.16879	0	24	0.618376	0.00161318	0	1
Procnias_nudicollis	Procnias nudicollis	Bare-throated Bellbird	Cotingidae	0	0	3	0	223.966	2.24055	0	34	0.30267	0.00323138	0	1
Procnias_tricarunculatus	Procnias tricarunculatus	Three-wattled Bellbird	Cotingidae	0	0	3	0	205.229	2.32222	0	53	0.304547	0.000767785	1	0
Pyroderus_scutatus	Pyroderus scutatus	Red-ruffed Fruitcrow	Cotingidae	0	0	3	0	16.2085	2.55267	0	33.5	0.311782	0.00273774	0	1
Querula_purpurata	Querula purpurata	Purple-throated Fruitcrow	Cotingidae	0	0	0	1	23.1584	2.02236	0	78	0.347065	0.000832931	0	1
Rupicola_peruvianus	Rupicola peruvianus	Andean Cock-of-the-rock	Cotingidae	0	0	3	0	105.412	2.38739	30	44	0.279182	0.000767286	0	0
Rupicola_rupicola	Rupicola rupicola	Guianan Cock-of-the-rock	Cotingidae	0	0	3	0	165.434	2.29003	30	78	0.287469	0.000886598	0	2
Schiffornis_major	Schiffornis major	Greater Schiffornis	Cotingidae	0	0	3	1	24.2057	1.49136	0	78	0.295137	0.000670689	0	1
Schiffornis_turdina	Schiffornis turdina	Thrush-like Schiffornis	Cotingidae	0	0	3	1	4.72557	1.50106	0	76	0.336737	0.000869518	0	1
Schiffornis_virescens	Schiffornis virescens	Greenish Schiffornis	Cotingidae	0	0	3	1	23.9688	1.40824	0	31	0.405105	0.00312136	0	1
Snowornis_cryptolophus	Snowornis cryptolophus	Olivaceous Piha	Cotingidae	0	0	3	0	9.78816	1.86688	0	77	0.189536	0.000769772	0	1
Snowornis_subalaris	Snowornis subalaris	Grey-tailed Piha	Cotingidae	0	0	3	0	36.1875	1.90956	0	77	0.188831	0.000790339	0	1
Tijuca_atra	Tijuca atra	Black-and-gold Cotinga	Cotingidae	0	0	3	1	173.413	1.90309	0	47.5	0.388219	0.00324391	0	0
Tijuca_condita	Tijuca condita	Grey-winged Cotinga	Cotingidae	0	0	3	1	9.83469	1.90309	0	42.5	0.444269	0.00315836	0	1
Tityra_cayana	Tityra cayana	Black-tailed Tityra	Cotingidae	0	0	0	1	126.678	1.83315	0	64	0.396536	0.00116438	0	1
Tityra_inquisitor	Tityra inquisitor	Black-crowned Tityra	Cotingidae	0	0	0	1	111.865	1.63448	0	54	0.414915	0.00120744	0	1
Tityra_semifasciata	Tityra semifasciata	Masked Tityra	Cotingidae	0	0	0	1	90.4562	1.89927	0	73	0.400494	0.000960511	0	1
Xenopsaris_albinucha	Xenopsaris albinucha	White-naped Xenopsaris	Cotingidae	0	0	0	1	34.8774	1	50	38	0.579238	0.0021104	0	1
Xipholena_atropurpurea	Xipholena atropurpurea	White-winged Cotinga	Cotingidae	0	0	3	0	136.291	1.78888	0	18	0.304017	0.00210223	0	1
Xipholena_lamellipennis	Xipholena lamellipennis	White-tailed Cotinga	Cotingidae	0	0	3	0	107.554	1.73239	0	75	0.442204	0.000977357	0	1
Xipholena_punicea	Xipholena punicea	Pompadour Cotinga	Cotingidae	0	0	3	0	87.4204	1.83315	0	77	0.333463	0.0008203	0	1
Zaratornis_stresemanni	Zaratornis stresemanni	White-cheeked Cotinga	Cotingidae	0	0	0	1	17.841	1.71684	0	10	0.382924	0.000981781	0	1
Cracticus_cassicus	Cracticus cassicus	Hooded Butcherbird	Cracticidae	0	0	0	1	21.1656	2.15229	0	75	0.163455	0.000615739	0	1
Cracticus_louisiadensis	Cracticus louisiadensis	Tagula Butcherbird	Cracticidae	0	0	NA	1	36.5402	2.13497	0	0	0.292668	0.00123748	0	0
Cracticus_mentalis	Cracticus mentalis	Black-backed Butcherbird	Cracticidae	0	0	0	1	31.2659	1.88649	0	28	0.687361	0.00241063	0	1
Cracticus_nigrogularis	Cracticus nigrogularis	Pied Butcherbird	Cracticidae	0	0	0	1	31.2367	2.10721	80	5	0.465763	0.00807823	0	2
Cracticus_quoyi	Cracticus quoyi	Black Butcherbird	Cracticidae	0	0	0	1	23.9761	2.22531	20	33.5	0.431119	0.00190555	0	1
Cracticus_torquatus	Cracticus torquatus	Grey Butcherbird	Cracticidae	0	0	0	1	24.5997	1.93131	60	5	0.369888	0.00858104	0	2
Gymnorhina_tibicen	Gymnorhina tibicen	Australian Magpie	Cracticidae	0	0	0	1	45.0907	2.4277	100	5	0.41686	0.00816702	0	3
Peltops_blainvillii	Peltops blainvillii	Lowland Peltops	Cracticidae	0	0	NA	1	28.0643	1.47712	0	76	0.172723	0.000657211	0	0
Peltops_montanus	Peltops montanus	Mountain Peltops	Cracticidae	0	0	NA	1	21.4382	1.49969	0	70	0.147137	0.000549479	0	0
Strepera_fuliginosa	Strepera fuliginosa	Black Currawong	Cracticidae	0	0	0	1	16.9102	2.57634	70	77.5	0.161224	0.00419668	0	1
Strepera_graculina	Strepera graculina	Pied Currawong	Cracticidae	0	0	0	1	42.7336	2.4764	30	18.5	0.38318	0.00719198	0	3
Strepera_versicolor	Strepera versicolor	Grey Currawong	Cracticidae	0	0	0	1	26.4335	2.59824	80	9	0.298002	0.00760686	0	2
Dasyornis_brachypterus	Dasyornis brachypterus	Eastern Bristlebird	Dasyornithidae	0	0	0	1	15.3999	1.62118	80	55	0.314052	0.00601831	0	2
Dasyornis_broadbenti	Dasyornis broadbenti	Rufous Bristlebird	Dasyornithidae	0	0	0	1	21.886	1.83187	80	23	0.28865	0.00551694	0	2
Dasyornis_longirostris	Dasyornis longirostris	Western Bristlebird	Dasyornithidae	0	0	0	1	17.5176	1.51455	80	25	0.294753	0.00489403	0	1
Campylorhamphus_falcularius	Campylorhamphus falcularius	Black-billed Scythebill	Dendrocolaptidae	0	0	NA	1	53.1498	1.62941	0	49	0.3002	0.00333556	0	1
Campylorhamphus_procurvoides	Campylorhamphus procurvoides	Curve-billed Scythebill	Dendrocolaptidae	0	0	NA	1	20.7577	1.52504	0	78	0.29521	0.000795348	0	1
Campylorhamphus_pucherani	Campylorhamphus pucherani	Greater Scythebill	Dendrocolaptidae	0	0	NA	1	15.9576	1.84819	0	14.5	0.322308	0.000788819	0	NA
Campylorhamphus_pusillus	Campylorhamphus pusillus	Brown-billed Scythebill	Dendrocolaptidae	0	0	0	1	20.6804	1.60746	0	43	0.246388	0.000692351	0	1
Campylorhamphus_trochilirostris	Campylorhamphus trochilirostris	Red-billed Scythebill	Dendrocolaptidae	0	0	0	1	49.8564	1.61066	0	38	0.478637	0.00166594	0	1
Deconychura_longicauda	Deconychura longicauda	Long-tailed Woodcreeper	Dendrocolaptidae	0	0	1	0	15.3893	1.37658	0	78	0.343375	0.000850277	0	1
Deconychura_stictolaema	Deconychura stictolaema	Spot-throated Woodcreeper	Dendrocolaptidae	0	0	NA	0	17.5368	1.26717	0	79	0.257689	0.000687675	0	0
Dendrexetastes_rufigula	Dendrexetastes rufigula	Cinnamon-throated Woodcreeper	Dendrocolaptidae	0	0	0	1	17.7395	1.84261	0	78	0.287929	0.000745011	0	1
Dendrocincla_anabatina	Dendrocincla anabatina	Tawny-winged Woodcreeper	Dendrocolaptidae	0	0	2	0	13.7483	1.53593	40	64	0.322954	0.00255611	0	1
Dendrocincla_fuliginosa	Dendrocincla fuliginosa	Plain-brown Woodcreeper	Dendrocolaptidae	0	0	2	0	9.03318	1.58771	33	77	0.343933	0.000860611	0	1
Dendrocincla_homochroa	Dendrocincla homochroa	Ruddy Woodcreeper	Dendrocolaptidae	0	0	1	0	21.2308	1.59806	0	47	0.343049	0.0012987	0	1
Dendrocincla_merula	Dendrocincla merula	White-chinned Woodcreeper	Dendrocolaptidae	0	0	2	0	14.71	1.70982	40	78	0.337321	0.000842831	0	1
Dendrocincla_tyrannina	Dendrocincla tyrannina	Tyrannine Woodcreeper	Dendrocolaptidae	0	0	2	0	14.4331	1.73957	0	25	0.238211	0.000655731	0	1
Dendrocolaptes_certhia	Dendrocolaptes certhia	Amazonian Barred Woodcreeper	Dendrocolaptidae	0	0	0	1	12.3281	1.83696	0	78	0.323263	0.0008312	0	1
Dendrocolaptes_hoffmannsi	Dendrocolaptes hoffmannsi	Hoffmanns's Woodcreeper	Dendrocolaptidae	0	0	NA	1	14.4064	1.91908	50	79	0.44129	0.000870565	0	1
Dendrocolaptes_picumnus	Dendrocolaptes picumnus	Black-banded Woodcreeper	Dendrocolaptidae	0	0	0	1	29.442	1.90547	40	76	0.309546	0.000831463	0	1
Dendrocolaptes_platyrostris	Dendrocolaptes platyrostris	Planalto Woodcreeper	Dendrocolaptidae	0	0	0	1	17.2695	1.79029	50	31	0.588844	0.00199529	0	1
Dendrocolaptes_sanctithomae	Dendrocolaptes sanctithomae	Northern Barred Woodcreeper	Dendrocolaptidae	0	0	0	1	14.8687	1.82543	0	45	0.322201	0.000910549	0	1
Dendroplex_kienerii	Dendroplex kienerii	Zimmer's Woodcreeper	Dendrocolaptidae	0	0	NA	1	31.6382	1.64147	0	78	0.302343	0.000642371	0	1
Dendroplex_picus	Dendroplex picus	Straight-billed Woodcreeper	Dendrocolaptidae	0	0	0	1	33.5098	1.60423	0	73	0.384349	0.000959528	0	1
Drymornis_bridgesii	Drymornis bridgesii	Scimitar-billed Woodcreeper	Dendrocolaptidae	0	0	0	1	25.2865	1.97313	100	34	0.415994	0.00722885	0	1
Glyphorynchus_spirurus	Glyphorynchus spirurus	Wedge-billed Woodcreeper	Dendrocolaptidae	0	0	0	1	15.7714	1.16435	0	76	0.336208	0.000866591	0	1
Hylexetastes_brigidai	Hylexetastes brigidai	Mato Grosso Woodcreeper	Dendrocolaptidae	0	0	NA	NA	NA	2.06819	0	NA	NA	NA	NA	1
Hylexetastes_perrotii	Hylexetastes perrotii	Red-billed Woodcreeper	Dendrocolaptidae	0	0	0	1	49.113	2.01536	0	77	0.439196	0.00103572	0	1
Hylexetastes_stresemanni	Hylexetastes stresemanni	Bar-bellied Woodcreeper	Dendrocolaptidae	0	0	NA	1	28.1773	2.04532	0	79	0.254672	0.000596785	0	0
Hylexetastes_uniformis	Hylexetastes uniformis	Uniform Woodcreeper	Dendrocolaptidae	0	0	NA	NA	NA	2.06819	0	NA	NA	NA	NA	0
Lepidocolaptes_affinis	Lepidocolaptes affinis	Spot-crowned Woodcreeper	Dendrocolaptidae	0	0	0	1	20.9139	1.54407	0	44	0.439187	0.00195593	0	0
Lepidocolaptes_albolineatus	Lepidocolaptes albolineatus	Lineated Woodcreeper	Dendrocolaptidae	0	0	NA	1	36.7426	1.3075	0	77	0.366872	0.000881827	0	1
Lepidocolaptes_angustirostris	Lepidocolaptes angustirostris	Narrow-billed Woodcreeper	Dendrocolaptidae	0	0	0	1	43.5104	1.46552	0	33	0.521443	0.00223838	0	1
Lepidocolaptes_falcinellus	Lepidocolaptes falcinellus	Scalloped Woodcreeper	Dendrocolaptidae	0	0	NA	1	27.1827	1.44716	0	54	0.194829	0.00478754	0	0
Lepidocolaptes_lacrymiger	Lepidocolaptes lacrymiger	Montane Woodcreeper	Dendrocolaptidae	0	0	NA	1	33.818	1.48572	0	44	0.297586	0.000827151	0	0
Lepidocolaptes_leucogaster	Lepidocolaptes leucogaster	White-striped Woodcreeper	Dendrocolaptidae	0	0	0	1	30.3646	1.5563	25	27	0.620589	0.00426285	0	0
Lepidocolaptes_souleyetii	Lepidocolaptes souleyetii	Streak-headed Woodcreeper	Dendrocolaptidae	0	0	0	1	34.3059	1.40993	0	31	0.408274	0.000935051	0	1
Lepidocolaptes_squamatus	Lepidocolaptes squamatus	Scaled Woodcreeper	Dendrocolaptidae	0	0	NA	1	30.296	1.44871	0	36	0.58927	0.00251071	0	1
Nasica_longirostris	Nasica longirostris	Long-billed Woodcreeper	Dendrocolaptidae	0	0	0	1	27.9101	1.96379	0	78	0.348562	0.000830107	0	0
Sittasomus_griseicapillus	Sittasomus griseicapillus	Olivaceous Woodcreeper	Dendrocolaptidae	0	0	0	1	18.7973	1.16676	0	57	0.407022	0.00127294	0	2
Xiphocolaptes_albicollis	Xiphocolaptes albicollis	White-throated Woodcreeper	Dendrocolaptidae	0	0	0	1	18.4954	2.07188	0	34	0.386244	0.0028549	0	1
Xiphocolaptes_falcirostris	Xiphocolaptes falcirostris	Moustached Woodcreeper	Dendrocolaptidae	0	0	0	1	22.7485	2.04139	20	28	0.728887	0.00176511	0	1
Xiphocolaptes_major	Xiphocolaptes major	Great Rufous Woodcreeper	Dendrocolaptidae	0	0	NA	1	14.5769	2.19312	33	49	0.459356	0.00478558	0	1
Xiphocolaptes_promeropirhynchus	Xiphocolaptes promeropirhynchus	Strong-billed Woodcreeper	Dendrocolaptidae	0	0	NA	1	17.6124	1.98	0	77	0.324723	0.000819377	0	1
Xiphorhynchus_elegans	Xiphorhynchus elegans	Elegant Woodcreeper	Dendrocolaptidae	0	0	NA	1	35.1459	1.53275	0	79	0.298459	0.000731104	0	1
Xiphorhynchus_erythropygius	Xiphorhynchus erythropygius	Spotted Woodcreeper	Dendrocolaptidae	0	0	1	0	22.8044	1.67025	0	42.5	0.331636	0.00101155	0	0
Xiphorhynchus_flavigaster	Xiphorhynchus flavigaster	Ivory-billed Woodcreeper	Dendrocolaptidae	0	0	NA	0	39.2847	1.66714	0	47	0.446098	0.00244033	0	1
Xiphorhynchus_fuscus	Xiphorhynchus fuscus	Lesser Woodcreeper	Dendrocolaptidae	0	0	NA	1	29.2943	1.33846	0	30	0.500639	0.00244259	0	1
Xiphorhynchus_guttatus	Xiphorhynchus guttatus	Buff-throated Woodcreeper	Dendrocolaptidae	0	0	1	0	20.648	1.77652	0	77	0.369172	0.000873776	0	1
Xiphorhynchus_lachrymosus	Xiphorhynchus lachrymosus	Black-striped Woodcreeper	Dendrocolaptidae	0	0	2	0	45.4478	1.75128	0	39	0.294582	0.00059423	0	0
Xiphorhynchus_obsoletus	Xiphorhynchus obsoletus	Striped Woodcreeper	Dendrocolaptidae	0	0	NA	1	27.0539	1.51322	0	78	0.344275	0.000862374	0	1
Xiphorhynchus_ocellatus	Xiphorhynchus ocellatus	Ocellated Woodcreeper	Dendrocolaptidae	0	0	NA	1	12.7599	1.5682	0	79	0.272429	0.000638794	0	1
Xiphorhynchus_pardalotus	Xiphorhynchus pardalotus	Chestnut-rumped Woodcreeper	Dendrocolaptidae	0	0	0	1	19.7422	1.5397	0	76	0.299352	0.000941906	0	1
Xiphorhynchus_spixii	Xiphorhynchus spixii	Spix's Woodcreeper	Dendrocolaptidae	0	0	NA	1	21.1462	1.49415	40	70	0.480661	0.00106452	0	1
Xiphorhynchus_susurrans	Xiphorhynchus susurrans	Cocoa Woodcreeper	Dendrocolaptidae	0	0	2	0	21.7667	1.66593	0	31.5	0.371695	0.000802225	0	1
Xiphorhynchus_triangularis	Xiphorhynchus triangularis	Olive-backed Woodcreeper	Dendrocolaptidae	0	0	NA	0	25.5241	1.66558	0	49.5	0.273858	0.000835173	0	1
Dicaeum_aeneum	Dicaeum aeneum	Midget Flowerpecker	Dicaeidae	0	0	0	1	66.96	0.966142	0	33.5	0.144209	0.000609935	0	1
Dicaeum_aeruginosum	Dicaeum aeruginosum	Striped Flowerpecker	Dicaeidae	0	0	NA	NA	NA	1.04139	0	NA	NA	NA	NA	1
Dicaeum_agile	Dicaeum agile	Thick-billed Flowerpecker	Dicaeidae	0	0	0	1	16.9959	0.954243	0	15	0.688079	0.00407426	0	1
Dicaeum_annae	Dicaeum annae	Golden-rumped Flowerpecker	Dicaeidae	0	0	0	1	29.2162	1	0	24	0.531084	0.000915576	0	0
Dicaeum_anthonyi	Dicaeum anthonyi	Flame-crowned Flowerpecker	Dicaeidae	0	0	NA	1	71.6582	1.06446	0	40	0.19039	0.000774307	0	0
Dicaeum_aureolimbatum	Dicaeum aureolimbatum	Yellow-sided Flowerpecker	Dicaeidae	0	0	NA	1	12.4992	0.908485	0	63	0.217144	0.000441683	0	0
Dicaeum_australe	Dicaeum australe	Red-striped Flowerpecker	Dicaeidae	0	0	NA	1	22.6555	0.939519	0	30	0.255124	0.00109588	0	1
Dicaeum_bicolor	Dicaeum bicolor	Bicoloured Flowerpecker	Dicaeidae	0	0	NA	1	69.9082	0.959041	0	25	0.26386	0.00106116	0	0
Dicaeum_celebicum	Dicaeum celebicum	Grey-sided Flowerpecker	Dicaeidae	0	0	0	1	106.892	0.812913	0	62.5	0.217292	0.00044433	0	1
Dicaeum_chrysorrheum	Dicaeum chrysorrheum	Yellow-vented Flowerpecker	Dicaeidae	0	0	0	1	9.45651	0.954243	0	43	0.524848	0.00174829	0	1
Dicaeum_concolor	Dicaeum concolor	Plain Flowerpecker	Dicaeidae	0	0	0	1	14.1599	0.792392	0	35	0.528994	0.00380989	0	1
Dicaeum_cruentatum	Dicaeum cruentatum	Scarlet-backed Flowerpecker	Dicaeidae	0	0	0	1	63.5406	0.748188	0	32	0.507649	0.00344804	0	1
Dicaeum_erythrorhynchos	Dicaeum erythrorhynchos	Pale-billed Flowerpecker	Dicaeidae	0	0	0	1	18.5292	0.799341	0	12	0.719353	0.00454176	0	0
Dicaeum_erythrothorax	Dicaeum erythrothorax	Flame-breasted Flowerpecker	Dicaeidae	0	0	0	1	45.3772	0.954243	0	64.5	0.191321	0.000442148	0	0
Dicaeum_everetti	Dicaeum everetti	Brown-backed Flowerpecker	Dicaeidae	0	0	NA	1	39.5362	0.92737	0	76	0.156381	0.00067331	0	1
Dicaeum_eximium	Dicaeum eximium	Red-banded Flowerpecker	Dicaeidae	0	0	NA	1	80.6368	0.897627	0	60	0.15119	0.000578915	0	0
Dicaeum_geelvinkianum	Dicaeum geelvinkianum	Red-capped Flowerpecker	Dicaeidae	0	0	0	1	50.4791	0.832509	0	75	0.173558	0.000776645	0	1
Dicaeum_haematostictum	Dicaeum haematostictum	Visayan Flowerpecker	Dicaeidae	0	0	NA	1	16.6094	0.944483	0	19	0.406062	0.000979839	0	1
Dicaeum_hirundinaceum	Dicaeum hirundinaceum	Mistletoebird	Dicaeidae	0	0	0	1	164.138	0.956649	0	5	0.435873	0.00807512	0	2
Dicaeum_hypoleucum	Dicaeum hypoleucum	Buzzing Flowerpecker	Dicaeidae	0	0	NA	1	50.272	0.90309	0	31	0.259344	0.00114323	0	0
Dicaeum_igniferum	Dicaeum igniferum	Black-fronted Flowerpecker	Dicaeidae	0	0	NA	1	132.068	0.92737	0	24	0.530365	0.000915576	0	0
Dicaeum_ignipectus	Dicaeum ignipectus	Fire-breasted Flowerpecker	Dicaeidae	0	0	0	1	84.5067	0.770852	0	25	0.508105	0.00672573	0	1
Dicaeum_maugei	Dicaeum maugei	Red-chested Flowerpecker	Dicaeidae	0	0	0	1	136.836	0.929419	0	30.5	0.523928	0.00124923	0	1
Dicaeum_melanoxanthum	Dicaeum melanoxanthum	Yellow-bellied Flowerpecker	Dicaeidae	0	0	0	1	75.6606	1.02119	0	41	0.576673	0.00658448	1	0
Dicaeum_monticolum	Dicaeum monticolum	Black-sided Flowerpecker	Dicaeidae	0	0	0	1	119.53	0.799341	0	77	0.154975	0.000532896	0	0
Dicaeum_nehrkorni	Dicaeum nehrkorni	Crimson-crowned Flowerpecker	Dicaeidae	0	0	NA	1	106.874	0.92737	0	63	0.217292	0.00044433	0	1
Dicaeum_nigrilore	Dicaeum nigrilore	Olive-capped Flowerpecker	Dicaeidae	0	0	NA	1	22.498	1.04139	0	41	0.177711	0.000676411	0	0
Dicaeum_nitidum	Dicaeum nitidum	Louisiade Flowerpecker	Dicaeidae	0	0	NA	1	79.1472	0.92737	0	0	0.292668	0.00123748	0	0
Dicaeum_pectorale	Dicaeum pectorale	Olive-crowned Flowerpecker	Dicaeidae	0	0	NA	1	61.2621	0.880814	0	80	0.169234	0.000534613	0	1
Dicaeum_proprium	Dicaeum proprium	Whiskered Flowerpecker	Dicaeidae	0	0	NA	1	30.1316	1.0086	0	40.5	0.183164	0.000669266	0	0
Dicaeum_pygmaeum	Dicaeum pygmaeum	Pygmy Flowerpecker	Dicaeidae	0	0	NA	1	63.7457	0.69897	0	24	0.268567	0.00104553	0	1
Dicaeum_quadricolor	Dicaeum quadricolor	Cebu Flowerpecker	Dicaeidae	0	0	NA	1	70.9129	0.92737	0	2.5	0.405969	0.000943936	0	1
Dicaeum_retrocinctum	Dicaeum retrocinctum	Scarlet-collared Flowerpecker	Dicaeidae	0	0	NA	1	20.5857	0.812913	0	21	0.406062	0.00103212	0	1
Dicaeum_sanguinolentum	Dicaeum sanguinolentum	Blood-breasted Flowerpecker	Dicaeidae	0	0	NA	1	74.6347	0.92737	0	9	0.443631	0.000663516	0	0
Dicaeum_trigonostigma	Dicaeum trigonostigma	Orange-bellied Flowerpecker	Dicaeidae	0	0	NA	1	77.8192	0.851258	0	44	0.23912	0.000662962	0	1
Dicaeum_tristrami	Dicaeum tristrami	Mottled Flowerpecker	Dicaeidae	0	0	NA	1	24.925	1.06819	0	53	0.145304	0.00072826	0	0
Dicaeum_trochileum	Dicaeum trochileum	Scarlet-headed Flowerpecker	Dicaeidae	0	0	NA	1	129.726	0.92737	0	22	0.310854	0.000542829	0	1
Dicaeum_vincens	Dicaeum vincens	White-throated Flowerpecker	Dicaeidae	0	0	0	1	34.1448	0.954243	0	25	0.291095	0.000910399	0	0
Dicaeum_vulneratum	Dicaeum vulneratum	Ashy Flowerpecker	Dicaeidae	0	0	NA	1	53.1603	0.954243	0	47	0.217415	0.000918045	0	0
Prionochilus_maculatus	Prionochilus maculatus	Yellow-breasted Flowerpecker	Dicaeidae	0	0	0	1	12.6796	0.90309	0	62	0.172442	0.000553037	0	0
Prionochilus_olivaceus	Prionochilus olivaceus	Olive-backed Flowerpecker	Dicaeidae	0	0	NA	1	13.4033	0.973128	0	35	0.254854	0.00109588	0	1
Prionochilus_percussus	Prionochilus percussus	Crimson-breasted Flowerpecker	Dicaeidae	0	0	0	1	86.9383	0.929419	0	42	0.201912	0.000600454	0	1
Prionochilus_plateni	Prionochilus plateni	Palawan Flowerpecker	Dicaeidae	0	0	NA	1	97.155	0.929419	0	4.5	0.496147	0.000767012	0	1
Prionochilus_thoracicus	Prionochilus thoracicus	Scarlet-breasted Flowerpecker	Dicaeidae	0	0	NA	1	149.982	0.94939	0	50	0.184725	0.00067433	0	0
Prionochilus_xanthopygius	Prionochilus xanthopygius	Yellow-rumped Flowerpecker	Dicaeidae	0	0	NA	1	62.9267	0.880814	0	76	0.168748	0.000482299	0	0
Chaetorhynchus_papuensis	Chaetorhynchus papuensis	Pygmy Drongo	Dicruridae	0	0	NA	1	17.4167	1.57403	0	73	0.154615	0.000576176	0	0
Dicrurus_adsimilis	Dicrurus adsimilis	Fork-tailed Drongo	Dicruridae	0	0	0	1	23.1127	1.60531	20	16	0.748942	0.00276873	0	3
Dicrurus_aeneus	Dicrurus aeneus	Bronzed Drongo	Dicruridae	0	0	0	1	27.9356	1.42325	0	29	0.445365	0.00520281	0	1
Dicrurus_aldabranus	Dicrurus aldabranus	Aldabra Drongo	Dicruridae	0	0	0	1	31.0087	1.68574	40	0	0.590671	0.00187068	0	1
Dicrurus_andamanensis	Dicrurus andamanensis	Andaman Drongo	Dicruridae	0	0	0	1	33.1811	1.69897	0	0	0.625155	0.000945176	0	1
Dicrurus_annectans	Dicrurus annectans	Crow-billed Drongo	Dicruridae	0	0	0	1	45.2252	1.64345	0	30	0.514774	0.0072807	1	1
Dicrurus_atripennis	Dicrurus atripennis	Shining Drongo	Dicruridae	0	0	0	1	45.7831	1.58995	0	78	0.249675	0.00100532	0	1
Dicrurus_balicassius	Dicrurus balicassius	Balicassiao	Dicruridae	0	0	NA	1	71.3626	1.85914	0	19.5	0.378691	0.00140265	0	0
Dicrurus_bracteatus	Dicrurus bracteatus	Spangled Drongo	Dicruridae	0	0	0	1	28.5917	1.9413	10	39	0.288447	0.00190086	1	2
Dicrurus_caerulescens	Dicrurus caerulescens	White-bellied Drongo	Dicruridae	0	0	0	1	14.1264	1.60206	30	11	0.737311	0.00598654	1	1
Dicrurus_densus	Dicrurus densus	Wallacean Drongo	Dicruridae	0	0	NA	1	29.4577	1.70312	0	35	0.530365	0.00103662	0	0
Dicrurus_forficatus	Dicrurus forficatus	Crested Drongo	Dicruridae	0	0	0	1	41.109	1.67302	0	13	0.613618	0.00321386	0	1
Dicrurus_fuscipennis	Dicrurus fuscipennis	Grand Comoro Drongo	Dicruridae	0	0	0	1	29.5712	1.70312	20	36	0.327842	NA	0	0
Dicrurus_hottentottus	Dicrurus hottentottus	Hair-crested Drongo	Dicruridae	0	0	0	1	24.0035	1.89873	0	22	0.485194	0.00463322	1	2
Dicrurus_leucophaeus	Dicrurus leucophaeus	Ashy Drongo	Dicruridae	0	0	0	1	16.5632	1.57519	0	22	0.488075	0.0074166	1	2
Dicrurus_ludwigii	Dicrurus ludwigii	Square-tailed Drongo	Dicruridae	0	0	0	1	69.398	1.46835	0	37	0.605153	0.00205254	0	1
Dicrurus_macrocercus	Dicrurus macrocercus	Black Drongo	Dicruridae	0	0	0	1	14.8434	1.68395	0	12	0.6033	0.00716502	1	2
Dicrurus_megarhynchus	Dicrurus megarhynchus	Ribbon-tailed Drongo	Dicruridae	0	0	NA	1	24.5563	2.11394	0	37	0.151176	0.000445546	0	0
Dicrurus_modestus	Dicrurus modestus	Velvet-mantled Drongo	Dicruridae	0	0	0	1	34.4035	1.65896	0	72	0.283439	0.000968123	0	NA
Dicrurus_montanus	Dicrurus montanus	Sulawesi Drongo	Dicruridae	0	0	NA	1	55.0794	1.78533	0	53	0.21627	0.00044433	0	0
Dicrurus_paradiseus	Dicrurus paradiseus	Greater Racket-tailed Drongo	Dicruridae	0	0	0	1	22.2284	1.94201	0	24	0.634715	0.00351562	1	2
Dicrurus_remifer	Dicrurus remifer	Lesser Racket-tailed Drongo	Dicruridae	0	0	0	1	20.7521	1.63448	0	29	0.4963	0.00446341	0	1
Dicrurus_sumatranus	Dicrurus sumatranus	Sumatran Drongo	Dicruridae	0	0	NA	1	43.7837	1.70312	0	21	0.167693	0.000567215	0	0
Dicrurus_waldenii	Dicrurus waldenii	Mayotte Drongo	Dicruridae	0	0	0	1	28.0759	1.70312	40	0	0.753181	0.00161283	0	0
Dulus_dominicus	Dulus dominicus	Palmchat	Dulidae	0	0	0	1	35.1877	1.68485	0	24	0.236861	0.00195313	0	1
Acanthidops_bairdii	Acanthidops bairdii	Peg-billed Finch	Emberizidae	0	0	NA	1	48.7953	1.20412	50	55	0.260082	0.000673673	0	0
Aimophila_aestivalis	Aimophila aestivalis	Bachman's Sparrow	Emberizidae	0	0	0	1	28.3524	1.28248	70	49	0.166132	0.0119277	0	0
Aimophila_botterii	Aimophila botterii	Botteri's Sparrow	Emberizidae	0	0	0	1	15.3374	1.29885	70	22	0.552355	0.00412546	1	1
Aimophila_carpalis	Aimophila carpalis	Rufous-winged Sparrow	Emberizidae	0	0	0	1	15.6789	1.18469	60	11	0.641765	0.00897633	0	0
Aimophila_cassinii	Aimophila cassinii	Cassin's Sparrow	Emberizidae	0	0	0	1	15.7461	1.27646	70	5	0.38617	0.01152	1	0
Aimophila_humeralis	Aimophila humeralis	Black-chested Sparrow	Emberizidae	0	0	0	1	9.03155	1.3784	90	28	0.763895	0.00226171	0	0
Aimophila_mystacalis	Aimophila mystacalis	Bridled Sparrow	Emberizidae	0	0	0	1	11.1665	1.34635	70	29	0.644228	0.00226812	0	2
Aimophila_notosticta	Aimophila notosticta	Oaxaca Sparrow	Emberizidae	0	0	0	1	14.3226	1.43297	100	36	0.683009	0.00201257	0	0
Aimophila_quinquestriata	Aimophila quinquestriata	Five-striped Sparrow	Emberizidae	0	0	0	1	15.1669	1.29115	80	35	0.623526	0.00748912	0	0
Aimophila_rufescens	Aimophila rufescens	Rusty Sparrow	Emberizidae	0	0	0	1	9.68131	1.53529	100	38	0.57906	0.00296921	0	1
Aimophila_ruficauda	Aimophila ruficauda	Stripe-headed Sparrow	Emberizidae	0	0	NA	1	24.9349	1.45025	90	35	0.738801	0.00209379	0	0
Aimophila_ruficeps	Aimophila ruficeps	Rufous-crowned Sparrow	Emberizidae	0	0	0	1	13.6026	1.27184	60	10	0.454007	0.0101639	0	0
Aimophila_stolzmanni	Aimophila stolzmanni	Tumbes Sparrow	Emberizidae	0	0	NA	1	38.1274	1.40909	70	5	0.440071	0.00114401	0	0
Aimophila_strigiceps	Aimophila strigiceps	Stripe-capped Sparrow	Emberizidae	0	0	NA	1	11.4659	1.34635	80	43	0.503617	0.00678532	0	2
Aimophila_sumichrasti	Aimophila sumichrasti	Cinnamon-tailed Sparrow	Emberizidae	0	0	NA	1	11.7492	1.46909	100	33	0.612358	0.00212776	0	0
Ammodramus_aurifrons	Ammodramus aurifrons	Yellow-browed Sparrow	Emberizidae	0	0	NA	1	20.6966	1.25042	80	78	0.292305	0.000758817	0	1
Ammodramus_bairdii	Ammodramus bairdii	Baird's Sparrow	Emberizidae	0	0	1	1	17.9467	1.25688	90	5	0.311723	0.0181077	2	3
Ammodramus_caudacutus	Ammodramus caudacutus	Saltmarsh Sparrow	Emberizidae	0	0	3	1	9.28243	1.28443	100	44	0.158078	0.0128058	1	2
Ammodramus_henslowii	Ammodramus henslowii	Henslow's Sparrow	Emberizidae	0	0	0	1	14.3386	1.10721	80	33	0.165764	0.0147632	2	3
Ammodramus_humeralis	Ammodramus humeralis	Grassland Sparrow	Emberizidae	0	0	NA	1	21.4092	1.20412	60	34	0.474035	0.00213404	0	1
Ammodramus_leconteii	Ammodramus leconteii	Le Conte's Sparrow	Emberizidae	0	0	0	1	28.7376	1.11394	80	51	0.267212	0.0199696	2	3
Ammodramus_maritimus	Ammodramus maritimus	Seaside Sparrow	Emberizidae	0	0	0	1	15.0117	1.36319	90	47	0.186135	0.00946563	1	3
Ammodramus_nelsoni	Ammodramus nelsoni	Nelson's Sparrow	Emberizidae	0	0	3	1	28.4861	1.18089	90	33	0.275594	0.0198721	2	2
Ammodramus_savannarum	Ammodramus savannarum	Grasshopper Sparrow	Emberizidae	0	0	0	1	25.6726	1.24483	80	14	0.263639	0.014613	1	3
Amphispiza_belli	Amphispiza belli	Sage Sparrow	Emberizidae	0	0	0	1	17.0394	1.23215	80	5	0.276622	0.0141181	1	3
Amphispiza_bilineata	Amphispiza bilineata	Black-throated Sparrow	Emberizidae	0	0	0	1	10.5223	1.13033	100	5	0.408696	0.0109573	1	3
Arremon_abeillei	Arremon abeillei	Black-capped Sparrow	Emberizidae	0	0	NA	1	24.4974	1.4133	80	5.5	0.529725	0.00139356	0	0
Arremon_aurantiirostris	Arremon aurantiirostris	Orange-billed Sparrow	Emberizidae	0	0	0	1	22.7769	1.53782	60	64	0.285922	0.000839273	0	1
Arremon_brunneinucha	Arremon brunneinucha	Chestnut-capped Brush-finch	Emberizidae	0	0	0	1	15.4711	1.64395	30	46	0.318204	0.000891976	0	1
Arremon_castaneiceps	Arremon castaneiceps	Olive Finch	Emberizidae	0	0	NA	1	17.0391	1.56703	20	67	0.188512	0.000734009	0	0
Arremon_crassirostris	Arremon crassirostris	Sooty-faced Finch	Emberizidae	0	0	NA	1	23.8503	1.58827	60	57.5	0.336873	0.00061778	0	0
Arremon_flavirostris	Arremon flavirostris	Saffron-billed Sparrow	Emberizidae	0	0	NA	1	47.8004	1.44395	80	35	0.517724	0.00273774	0	1
Arremon_franciscanus	Arremon franciscanus	Sao Francisco Sparrow	Emberizidae	0	0	NA	1	29.2597	1.3962	70	48	0.629458	0.00193106	0	1
Arremon_schlegeli	Arremon schlegeli	Golden-winged Sparrow	Emberizidae	0	0	NA	1	52.7605	1.44248	80	15	0.372732	0.000833464	0	1
Arremon_semitorquatus	Arremon semitorquatus	Half-collared Sparrow	Emberizidae	0	0	NA	1	64.5668	1.39794	80	41	0.367864	0.00324391	0	1
Arremon_taciturnus	Arremon taciturnus	Pectoral Sparrow	Emberizidae	0	0	NA	1	51.2836	1.39445	50	69	0.41477	0.00107781	0	1
Arremon_torquatus	Arremon torquatus	Stripe-headed Brush-finch	Emberizidae	0	0	0	1	49.0903	1.62325	0	38	0.326763	0.000893674	0	0
Arremon_virenticeps	Arremon virenticeps	Green-striped Brush-finch	Emberizidae	0	0	NA	1	20.682	1.61278	40	37.5	0.738801	0.00292423	0	0
Arremonops_chloronotus	Arremonops chloronotus	Green-backed Sparrow	Emberizidae	0	0	NA	1	30.1634	1.43775	70	68	0.317776	0.0025543	0	1
Arremonops_conirostris	Arremonops conirostris	Black-striped Sparrow	Emberizidae	0	0	0	1	18.4722	1.55991	70	25	0.408261	0.000941265	0	1
Arremonops_rufivirgatus	Arremonops rufivirgatus	Olive Sparrow	Emberizidae	0	0	0	1	18.4167	1.35122	80	29	0.409916	0.00311744	0	1
Arremonops_tocuyensis	Arremonops tocuyensis	Tocuyo Sparrow	Emberizidae	0	0	NA	1	17.7928	1.46776	80	9	0.41033	0.00118939	0	0
Atlapetes_albiceps	Atlapetes albiceps	White-headed Brush-finch	Emberizidae	0	0	NA	1	22.3299	NA	40	5	0.399752	0.000872808	0	0
Atlapetes_albinucha	Atlapetes albinucha	White-naped Brush-finch	Emberizidae	0	0	0	1	10.4876	1.52956	80	42	0.372672	0.00113543	0	1
Atlapetes_albofrenatus	Atlapetes albofrenatus	Moustached Brush-finch	Emberizidae	0	0	NA	1	16.1521	1.47712	80	15	0.221462	0.000616667	0	0
Atlapetes_canigenis	Atlapetes canigenis	Grey Brush-finch	Emberizidae	0	0	NA	1	18.8386	1.50745	60	78	0.385887	0.00113346	0	1
Atlapetes_citrinellus	Atlapetes citrinellus	Yellow-striped Brush-finch	Emberizidae	0	0	NA	1	18.8916	1.44716	0	52.5	0.652574	0.00645002	0	0
Atlapetes_flaviceps	Atlapetes flaviceps	Yellow-headed Brush-finch	Emberizidae	0	0	NA	1	15.3598	1.52711	70	14	0.192548	0.000604558	0	1
Atlapetes_forbesi	Atlapetes forbesi	Apurimac Brush-finch	Emberizidae	0	0	NA	1	11.6549	NA	50	28	0.577817	0.00190132	0	1
Atlapetes_fulviceps	Atlapetes fulviceps	Fulvous-headed Brush-finch	Emberizidae	0	0	NA	1	18.6866	1.45025	30	56.5	0.551352	0.00409584	0	1
Atlapetes_fuscoolivaceus	Atlapetes fuscoolivaceus	Dusky-headed Brush-finch	Emberizidae	0	0	NA	1	32.8611	1.51188	70	18	0.405464	0.000513084	0	0
Atlapetes_latinuchus	Atlapetes latinuchus	Yellow-breasted Brush-finch	Emberizidae	0	0	0	1	14.071	1.38051	80	14.5	0.230571	0.000604131	0	1
Atlapetes_leucopis	Atlapetes leucopis	White-rimmed Brush-finch	Emberizidae	0	0	NA	1	18.1077	1.50745	60	7.5	0.225303	0.000591051	0	1
Atlapetes_leucopterus	Atlapetes leucopterus	White-winged Brush-finch	Emberizidae	0	0	NA	1	10.9195	1.31806	50	5.5	0.388526	0.000677833	0	1
Atlapetes_melanocephalus	Atlapetes melanocephalus	Santa Marta Brush-finch	Emberizidae	0	0	NA	1	15.9045	1.39794	70	17.5	0.430905	0.000750967	0	0
Atlapetes_melanolaemus	Atlapetes melanolaemus	Black-faced Brush-finch	Emberizidae	0	0	NA	1	24.6745	1.4609	70	62	0.355619	0.00171743	0	1
Atlapetes_melanopsis	Atlapetes melanopsis	Black-spectacled Brush-finch	Emberizidae	0	0	NA	1	17.1552	1.50745	70	61.5	0.379157	0.00136217	0	1
Atlapetes_nationi	Atlapetes nationi	Rusty-bellied Brush-finch	Emberizidae	0	0	NA	1	17.6005	1.61909	0	5	0.530227	0.00167859	0	0
Atlapetes_pallidiceps	Atlapetes pallidiceps	Pale-headed Brush-finch	Emberizidae	0	0	0	1	30.2912	NA	40	23	0.20364	0.000688342	0	1
Atlapetes_pallidinucha	Atlapetes pallidinucha	Pale-naped Brush-finch	Emberizidae	0	0	NA	1	13.1191	1.53908	90	24.5	0.213177	0.000586648	0	0
Atlapetes_personatus	Atlapetes personatus	Tepui Brush-finch	Emberizidae	0	0	NA	1	16.009	1.51455	40	75.5	0.336328	0.000661113	0	0
Atlapetes_pileatus	Atlapetes pileatus	Rufous-capped Brush-finch	Emberizidae	0	0	0	1	15.357	1.38021	70	34	0.648079	0.00343143	0	1
Atlapetes_rufigenis	Atlapetes rufigenis	Rufous-eared Brush-finch	Emberizidae	0	0	NA	1	31.3241	1.50745	0	12	0.339485	0.00056507	0	1
Atlapetes_rufinucha	Atlapetes rufinucha	Rufous-naped Brush-finch	Emberizidae	0	0	NA	1	24.1823	1.33345	60	62.5	0.329176	0.00252798	0	1
Atlapetes_schistaceus	Atlapetes schistaceus	Slaty Brush-finch	Emberizidae	0	0	NA	1	32.3167	1.47185	70	24	0.279427	0.000586527	0	1
Atlapetes_seebohmi	Atlapetes seebohmi	Bay-crowned Brush-finch	Emberizidae	0	0	NA	1	18.2063	1.50745	50	5	0.398243	0.00104222	0	0
Atlapetes_semirufus	Atlapetes semirufus	Ochre-breasted Brush-finch	Emberizidae	0	0	NA	1	15.8528	1.48714	30	21	0.324883	0.000717849	0	1
Atlapetes_terborghi	Atlapetes terborghi	Vilcabamba Brush-finch	Emberizidae	0	0	NA	1	21.9382	1.48144	50	8	0.513038	0.00154022	0	1
Atlapetes_tricolor	Atlapetes tricolor	Tricoloured Brush-finch	Emberizidae	0	0	NA	1	25.52	1.56229	60	48.5	0.32217	0.00116037	0	0
Prinia_socialis	Prinia socialis	Ashy Prinia	Cisticolidae	1	1	0	1	11.8922	0.90309	40	11	0.727977	0.00607643	0	2
Calcarius_lapponicus	Calcarius lapponicus	Lapland Longspur	Emberizidae	0	0	2	1	90.5609	1.44483	70	5	0.252658	0.0233416	2	0
Calcarius_mccownii	Calcarius mccownii	McCown's Longspur	Emberizidae	0	0	1	1	60.8626	1.40993	80	5	0.293205	0.0154635	2	3
Calcarius_ornatus	Calcarius ornatus	Chestnut-collared Longspur	Emberizidae	0	0	0	1	90.7106	1.3075	90	5	0.320308	0.0177806	2	3
Malurus_amabilis	Malurus amabilis	Lovely Fairywren	Maluridae	1	0	0	1	170.079	0.937016	0	21	0.779048	0.00242055	0	0
Camarhynchus_heliobates	Camarhynchus heliobates	Mangrove Finch	Emberizidae	0	0	0	1	120.733	1.25527	40	2.5	0.369269	0.00257831	0	1
Camarhynchus_pallidus	Camarhynchus pallidus	Woodpecker Finch	Emberizidae	0	0	0	1	23.6822	1.36361	50	5	0.377271	0.00257831	0	0
Camarhynchus_parvulus	Camarhynchus parvulus	Small Tree-finch	Emberizidae	0	0	0	1	93.5027	1.12057	40	5	0.377271	0.00257831	0	2
Camarhynchus_pauper	Camarhynchus pauper	Medium Tree-finch	Emberizidae	0	0	0	1	98.2489	1.20412	60	1	0.610921	0.00173075	0	1
Camarhynchus_psittacula	Camarhynchus psittacula	Large Tree-finch	Emberizidae	0	0	0	1	116.935	1.27184	60	2.5	0.369269	0.00257831	0	1
Catamenia_analis	Catamenia analis	Band-tailed Seedeater	Emberizidae	0	0	NA	1	69.2259	1.07918	80	9	0.415878	0.00345319	0	1
Catamenia_homochroa	Catamenia homochroa	Paramo Seedeater	Emberizidae	0	0	NA	1	53.1244	1.08636	50	53	0.305665	0.000832055	0	1
Catamenia_inornata	Catamenia inornata	Plain-coloured Seedeater	Emberizidae	0	0	NA	1	46.1781	1.1271	80	14	0.394704	0.00206162	0	1
Certhidea_olivacea	Certhidea olivacea	Warbler Finch	Emberizidae	0	0	NA	1	25.9925	0.977724	60	5	0.377271	0.00257831	0	1
Charitospiza_eucosma	Charitospiza eucosma	Coal-crested Finch	Emberizidae	0	0	NA	1	126.445	NA	90	31	0.717901	0.00161841	0	1
Chondestes_grammacus	Chondestes grammacus	Lark Sparrow	Emberizidae	0	0	0	1	16.1664	1.4624	80	5	0.305779	0.0137571	1	2
Coryphaspiza_melanotis	Coryphaspiza melanotis	Black-masked Finch	Emberizidae	0	0	NA	1	14.1721	1.1959	0	28	0.569314	0.00249739	0	1
Coryphospingus_cucullatus	Coryphospingus cucullatus	Red-crested Finch	Emberizidae	0	0	NA	1	73.4682	1.16296	0	40	0.416229	0.00427684	1	1
Coryphospingus_pileatus	Coryphospingus pileatus	Pileated Finch	Emberizidae	0	0	NA	1	40.4296	1.18469	0	30	0.644463	0.00174492	0	1
Diuca_diuca	Diuca diuca	Common Diuca-finch	Emberizidae	0	0	NA	1	36.1992	1.56585	80	7	0.311317	0.0085301	1	2
Diuca_speculifera	Diuca speculifera	White-winged Diuca-finch	Emberizidae	0	0	NA	1	38.0842	NA	80	8	0.454151	0.00199707	0	1
Dolospingus_fringilloides	Dolospingus fringilloides	White-naped Seedeater	Emberizidae	0	0	NA	1	132.956	1.1038	70	78	0.159443	0.000652181	0	1
Donacospiza_albifrons	Donacospiza albifrons	Long-tailed Reed-finch	Emberizidae	0	0	NA	1	34.0607	1.20071	80	33	0.244443	0.00601329	0	1
Emberiza_affinis	Emberiza affinis	Brown-rumped Bunting	Emberizidae	0	0	0	1	23.747	1.18752	0	17	0.866608	0.00263976	0	0
Emberiza_aureola	Emberiza aureola	Yellow-breasted Bunting	Emberizidae	0	0	0	1	88.3971	1.29226	0	25	0.258342	0.022445	2	3
Emberiza_bruniceps	Emberiza bruniceps	Red-headed Bunting	Emberizidae	0	0	0	0	110.444	1.39445	0	5	0.266249	0.0188005	2	3
Emberiza_buchanani	Emberiza buchanani	Grey-necked Bunting	Emberizidae	0	0	0	1	22.5021	1.32634	100	5	0.307212	0.0199772	2	1
Emberiza_cabanisi	Emberiza cabanisi	Cabanis's Bunting	Emberizidae	0	0	0	1	52.0487	1.3962	0	41	0.726821	0.00208208	0	1
Emberiza_caesia	Emberiza caesia	Cretzschmar's Bunting	Emberizidae	0	0	0	1	53.2621	1.28212	100	5	0.612033	0.0112332	2	2
Emberiza_capensis	Emberiza capensis	Cape Bunting	Emberizidae	0	0	0	1	15.1305	1.32015	0	5	0.560996	0.00618513	0	1
Emberiza_chrysophrys	Emberiza chrysophrys	Yellow-browed Bunting	Emberizidae	0	0	0	1	77.1402	1.25527	0	47	0.463942	0.0255255	2	2
Emberiza_cia	Emberiza cia	Rock Bunting	Emberizidae	0	0	0	1	52.7925	1.37014	100	5	0.296029	0.0134722	1	3
Emberiza_cineracea	Emberiza cineracea	Cinereous Bunting	Emberizidae	0	0	0	1	78.178	1.38561	90	5	0.543261	0.0149014	2	1
Emberiza_cioides	Emberiza cioides	Meadow Bunting	Emberizidae	0	0	0	1	34.6547	1.32325	100	10	0.472057	0.0197287	1	2
Emberiza_cirlus	Emberiza cirlus	Cirl Bunting	Emberizidae	0	0	0	1	55.9834	1.40824	100	11	0.258271	0.00983082	1	3
Emberiza_citrinella	Emberiza citrinella	Yellowhammer	Emberizidae	0	0	0	1	59.6037	1.47276	100	28	0.185806	0.0177056	1	3
Emberiza_elegans	Emberiza elegans	Yellow-throated Bunting	Emberizidae	0	0	0	1	50.9993	1.2286	0	30	0.496989	0.0169222	1	2
Emberiza_flaviventris	Emberiza flaviventris	African Golden-breasted Bunting	Emberizidae	0	0	0	1	50.236	1.26126	0	18	0.800418	0.00383287	0	1
Emberiza_fucata	Emberiza fucata	Chestnut-eared Bunting	Emberizidae	0	0	0	1	61.3833	1.29667	0	29	0.517651	0.0140141	1	2
Emberiza_godlewskii	Emberiza godlewskii	Godlewski's Bunting	Emberizidae	0	0	NA	1	49.0851	1.27875	100	8	0.514752	0.0130053	1	1
Emberiza_hortulana	Emberiza hortulana	Ortolan Bunting	Emberizidae	0	0	1	1	36.291	1.29885	50	11	0.19091	0.0158999	2	3
Emberiza_impetuani	Emberiza impetuani	Lark-like Bunting	Emberizidae	0	0	0	1	15.5426	1.17898	0	5	0.524586	0.00735153	1	2
Emberiza_jankowskii	Emberiza jankowskii	Rufous-backed Bunting	Emberizidae	0	0	0	1	63.0546	1.35218	100	19	0.512091	0.023488	0	1
Emberiza_koslowi	Emberiza koslowi	Tibetan Bunting	Emberizidae	0	0	0	1	138.565	1.39794	80	5	0.583547	0.0126559	0	1
Emberiza_leucocephalos	Emberiza leucocephalos	Pine Bunting	Emberizidae	0	0	0	1	109.883	1.45484	100	32	0.289193	0.0241	1	2
Emberiza_melanocephala	Emberiza melanocephala	Black-headed Bunting	Emberizidae	0	0	0	0	113.652	1.45255	0	5	0.335591	0.013526	2	3
Emberiza_pallasi	Emberiza pallasi	Pallas's Bunting	Emberizidae	0	0	0	1	131.429	1.14613	70	22	0.304488	0.0261047	2	2
Emberiza_poliopleura	Emberiza poliopleura	Somali Golden-breasted Bunting	Emberizidae	0	0	0	1	44.6157	1.19866	0	5	0.520483	0.00163848	0	0
Emberiza_pusilla	Emberiza pusilla	Little Bunting	Emberizidae	0	0	0	1	17.1031	1.16614	0	23	0.24554	0.0269576	2	3
Emberiza_rustica	Emberiza rustica	Rustic Bunting	Emberizidae	0	0	0	1	54.905	1.31281	0	32	0.248424	0.0231648	2	3
Emberiza_rutila	Emberiza rutila	Chestnut Bunting	Emberizidae	0	0	0	1	74.1534	1.24304	0	41	0.516033	0.02617	2	2
Emberiza_schoeniclus	Emberiza schoeniclus	Reed Bunting	Emberizidae	0	0	2	1	118.086	1.266	90	16	0.215133	0.0202824	1	3
Emberiza_socotrana	Emberiza socotrana	Socotra Bunting	Emberizidae	0	0	0	1	65.2992	1.16137	0	16	0.610925	0.00187795	0	1
Emberiza_spodocephala	Emberiza spodocephala	Black-faced Bunting	Emberizidae	0	0	0	1	48.6775	1.26834	90	31	0.492323	0.0231629	2	3
Emberiza_stewarti	Emberiza stewarti	Chestnut-breasted Bunting	Emberizidae	0	0	0	1	124.262	1.20412	100	5	0.374447	0.0132342	2	1
Emberiza_striolata	Emberiza striolata	House Bunting	Emberizidae	0	0	0	1	52.7617	1.17026	100	0	0.435204	0.0082057	0	2
Emberiza_sulphurata	Emberiza sulphurata	Yellow Bunting	Emberizidae	0	0	NA	1	43.1266	1.17319	80	45	0.170393	0.0134519	2	1
Emberiza_tahapisi	Emberiza tahapisi	Cinnamon-breasted Bunting	Emberizidae	0	0	0	1	100.804	1.13267	0	16	0.801692	0.00296891	0	1
Emberiza_tristrami	Emberiza tristrami	Tristram's Bunting	Emberizidae	0	0	0	1	68.6247	1.25527	0	37	0.482797	0.025409	2	1
Emberiza_variabilis	Emberiza variabilis	Grey Bunting	Emberizidae	0	0	0	1	97.8291	1.37658	80	19	0.182266	0.0143808	2	2
Emberiza_yessoensis	Emberiza yessoensis	Ochre-rumped Bunting	Emberizidae	0	0	0	1	110.092	1.13033	60	32.5	0.436653	0.0249638	2	1
Emberizoides_duidae	Emberizoides duidae	Duida Grass-finch	Emberizidae	0	0	NA	1	19.0916	NA	20	80	0.202223	0.00077101	0	1
Emberizoides_herbicola	Emberizoides herbicola	Wedge-tailed Grass-finch	Emberizidae	0	0	0	1	12.6789	1.44143	70	37	0.454903	0.00206952	0	1
Emberizoides_ypiranganus	Emberizoides ypiranganus	Grey-cheeked Grass-finch	Emberizidae	0	0	NA	1	23.4908	1.3032	20	46	0.208219	0.00596344	0	1
Embernagra_longicauda	Embernagra longicauda	Pale-throated Pampa-finch	Emberizidae	0	0	NA	1	12.3124	NA	100	45	0.517794	0.00237918	0	1
Embernagra_platensis	Embernagra platensis	Great Pampa-finch	Emberizidae	0	0	NA	1	21.7765	1.65801	20	28	0.329761	0.00674277	0	2
Euneornis_campestris	Euneornis campestris	Orangequit	Emberizidae	0	0	NA	1	97.7159	1.20412	0	29	0.261546	0.00158112	0	1
Geospiza_conirostris	Geospiza conirostris	Large Cactus-finch	Emberizidae	0	0	0	1	86.0861	1.44091	50	0	0.672464	0.00173075	0	2
Geospiza_difficilis	Geospiza difficilis	Sharp-beaked Ground-finch	Emberizidae	0	0	0	1	116.821	1.08991	80	2.5	0.385273	NA	0	2
Geospiza_fortis	Geospiza fortis	Medium Ground-finch	Emberizidae	0	0	0	1	163.585	1.38021	70	5	0.377271	0.00257831	0	3
Geospiza_fuliginosa	Geospiza fuliginosa	Small Ground-finch	Emberizidae	0	0	0	1	182.702	1.16137	50	5	0.377271	0.00257831	0	2
Geospiza_magnirostris	Geospiza magnirostris	Large Ground-finch	Emberizidae	0	0	0	1	145.204	1.53782	100	5	0.377271	0.00257831	0	2
Geospiza_scandens	Geospiza scandens	Common Cactus-finch	Emberizidae	0	0	0	1	145.799	1.35603	40	5	0.377271	0.00261274	0	2
Gubernatrix_cristata	Gubernatrix cristata	Yellow Cardinal	Emberizidae	0	0	NA	1	40.3839	1.67761	60	16	0.311915	0.00780389	0	1
Haplospiza_rustica	Haplospiza rustica	Slaty Finch	Emberizidae	0	0	NA	1	25.5511	1.19312	80	46	0.32264	0.00110093	0	1
Haplospiza_unicolor	Haplospiza unicolor	Uniform Finch	Emberizidae	0	0	NA	1	49.9502	1.18469	80	42	0.246435	0.00433816	0	1
Idiopsar_brachyurus	Idiopsar brachyurus	Short-tailed Finch	Emberizidae	0	0	NA	1	17.9872	1.63347	90	15	0.41636	0.00256345	0	1
Incaspiza_laeta	Incaspiza laeta	Buff-bridled Inca-finch	Emberizidae	0	0	NA	1	17.5863	1.34242	30	21	0.339485	0.000545854	0	0
Incaspiza_ortizi	Incaspiza ortizi	Grey-winged Inca-finch	Emberizidae	0	0	NA	1	33.3057	1.51188	30	26	0.209297	0.000979915	0	0
Incaspiza_personata	Incaspiza personata	Rufous-backed Inca-finch	Emberizidae	0	0	NA	1	20.6855	1.52179	70	24	0.320566	0.000598517	0	0
Incaspiza_pulchra	Incaspiza pulchra	Great Inca-finch	Emberizidae	0	0	NA	1	45.4598	1.44091	80	5	0.404395	0.00102103	0	1
Incaspiza_watkinsi	Incaspiza watkinsi	Little Inca-finch	Emberizidae	0	0	NA	1	14.4146	1.30963	100	67.5	0.212694	0.000933051	0	0
Junco_hyemalis	Junco hyemalis	Dark-eyed Junco	Emberizidae	0	0	0	1	27.8204	1.2794	60	33	0.252201	0.0181369	1	3
Junco_phaeonotus	Junco phaeonotus	Yellow-eyed Junco	Emberizidae	0	0	0	1	16.7676	1.30963	80	25	0.572319	0.00398983	0	2
Junco_vulcani	Junco vulcani	Volcano Junco	Emberizidae	0	0	NA	1	14.2774	1.44716	80	53	0.235681	0.00065074	0	1
Latoucheornis_siemsseni	Latoucheornis siemsseni	Slaty Bunting	Emberizidae	0	0	0	1	90.2433	1.30103	90	15	0.490891	0.0111425	2	1
Lophospingus_griseocristatus	Lophospingus griseocristatus	Grey-crested Finch	Emberizidae	0	0	NA	1	18.0552	1.25285	80	49	0.52306	0.00342131	0	0
Lophospingus_pusillus	Lophospingus pusillus	Black-crested Finch	Emberizidae	0	0	NA	1	65.684	1.15987	90	45	0.575107	0.00635119	0	1
Loxigilla_barbadensis	Loxigilla barbadensis	Barbados Bullfinch	Emberizidae	0	0	0	1	18.4911	1.19451	0	0	0.277504	0.00114032	0	1
Loxigilla_noctis	Loxigilla noctis	Lesser Antillean Bullfinch	Emberizidae	0	0	NA	1	154.942	1.22965	0	39	0.243501	0.00131996	0	2
Loxigilla_portoricensis	Loxigilla portoricensis	Puerto Rican Bullfinch	Emberizidae	0	0	NA	1	16.2867	1.50718	0	24	0.209882	0.00165418	0	1
Loxigilla_violacea	Loxigilla violacea	Greater Antillean Bullfinch	Emberizidae	0	0	NA	1	67.6468	1.3496	0	21.5	0.249244	0.00192684	0	1
Loxipasser_anoxanthus	Loxipasser anoxanthus	Yellow-shouldered Grassquit	Emberizidae	0	0	NA	1	114.418	1.0569	80	29	0.261546	0.00158112	0	1
Melanodera_melanodera	Melanodera melanodera	White-bridled Finch	Emberizidae	0	0	NA	1	87.7996	1.45788	80	5	0.192236	0.00710212	0	0
Melanodera_xanthogramma	Melanodera xanthogramma	Yellow-bridled Finch	Emberizidae	0	0	NA	1	69.4087	1.54531	80	13	0.217542	0.00604968	0	1
Melanospiza_richardsoni	Melanospiza richardsoni	St Lucia Black Finch	Emberizidae	0	0	NA	1	152.249	1.32015	70	68	0.24933	0.00130971	0	1
Melophus_lathami	Melophus lathami	Crested Bunting	Emberizidae	0	0	0	1	98.1045	1.34044	100	12	0.702544	0.00778812	1	1
Melopyrrha_nigra	Melopyrrha nigra	Cuban Bullfinch	Emberizidae	0	0	NA	1	42.1615	1.17416	0	14	0.325297	0.00271714	0	1
Cisticola_aridulus	Cisticola aridulus	Desert Cisticola	Cisticolidae	1	1	2	1	23.3433	0.966142	50	6	0.713345	0.004331	0	1
Melospiza_lincolnii	Melospiza lincolnii	Lincoln's Sparrow	Emberizidae	0	0	0	1	37.0484	1.22011	100	40	0.236268	0.0187672	2	2
Melospiza_melodia	Melospiza melodia	Song Sparrow	Emberizidae	0	0	2	1	22.6909	1.40652	70	32	0.253617	0.0152795	1	3
Melozone_biarcuata	Melozone biarcuata	Prevost's Ground-sparrow	Emberizidae	0	0	NA	1	21.7896	1.48572	90	56	0.404112	0.00179735	0	1
Melozone_kieneri	Melozone kieneri	Rusty-crowned Ground-sparrow	Emberizidae	0	0	0	1	10.3224	1.58771	100	37.5	0.739388	0.00273624	0	1
Melozone_leucotis	Melozone leucotis	White-eared Ground-sparrow	Emberizidae	0	0	NA	1	22.1609	1.60097	70	49.5	0.524468	0.00124903	0	1
Miliaria_calandra	Miliaria calandra	Corn Bunting	Emberizidae	0	0	3	1	35.5337	1.68797	90	5	0.236185	0.0130016	1	3
Nesospiza_acunhae	Nesospiza acunhae	Inaccessible Bunting	Emberizidae	0	0	0	1	41.0507	1.45561	70	0	0.39191	0.00449611	0	1
Nesospiza_questi	Nesospiza questi	Nightingale Bunting	Emberizidae	0	0	NA	1	55.3662	1.42325	70	0	0.26918	0.00449611	0	0
Nesospiza_wilkinsi	Nesospiza wilkinsi	Wilkins's Bunting	Emberizidae	0	0	NA	1	57.5327	1.63599	90	0	0.39191	0.00449611	0	1
Oreothraupis_arremonops	Oreothraupis arremonops	Tanager Finch	Emberizidae	0	0	NA	1	12.3936	NA	50	8	0.244885	0.000493893	0	1
Oriturus_superciliosus	Oriturus superciliosus	Striped Sparrow	Emberizidae	0	0	0	1	13.8207	1.617	70	27	0.659425	0.00390025	0	1
Oryzoborus_angolensis	Oryzoborus angolensis	Lesser Seed-finch	Emberizidae	0	0	0	1	89.0366	1.11394	60	63	0.393641	0.00113319	0	2
Oryzoborus_atrirostris	Oryzoborus atrirostris	Black-billed Seed-finch	Emberizidae	0	0	NA	1	85.4807	1.41497	70	79	0.176746	0.000897386	0	0
Oryzoborus_crassirostris	Oryzoborus crassirostris	Large-billed Seed-finch	Emberizidae	0	0	0	1	69.7192	1.32015	70	74	0.227339	0.000742526	0	1
Oryzoborus_funereus	Oryzoborus funereus	Thick-billed Seed-finch	Emberizidae	0	0	NA	1	70.9463	1.08991	60	54.5	0.298003	0.000943185	0	1
Oryzoborus_maximiliani	Oryzoborus maximiliani	Great-billed Seed-finch	Emberizidae	0	0	NA	1	73.004	1.39094	70	32	0.643051	0.0017245	0	1
Oryzoborus_nuttingi	Oryzoborus nuttingi	Nicaraguan Seed-finch	Emberizidae	0	0	NA	1	71.8724	1.38021	90	69	0.301163	0.000870431	0	1
Paroaria_baeri	Paroaria baeri	Crimson-fronted Cardinal	Emberizidae	0	0	NA	1	12.7552	NA	0	39	0.786689	0.00166037	0	1
Paroaria_capitata	Paroaria capitata	Yellow-billed Cardinal	Emberizidae	0	0	NA	1	8.89582	1.3483	0	44	0.460386	0.00653506	0	1
Paroaria_coronata	Paroaria coronata	Red-crested Cardinal	Emberizidae	0	0	NA	1	13.7625	1.57807	20	37	0.395619	0.00676804	0	2
Paroaria_dominicana	Paroaria dominicana	Red-cowled Cardinal	Emberizidae	0	0	NA	1	9.41343	1.52114	20	24	0.657285	0.00182628	0	1
Paroaria_gularis	Paroaria gularis	Red-capped Cardinal	Emberizidae	0	0	NA	1	6.29703	1.37291	30	77	0.368113	0.000872898	0	1
Passerculus_sandwichensis	Passerculus sandwichensis	Savannah Sparrow	Emberizidae	0	0	2	1	26.4013	1.3153	80	20	0.261158	0.0184261	1	3
Passerella_iliaca	Passerella iliaca	Fox Sparrow	Emberizidae	0	0	0	1	27.8121	1.52582	90	23	0.260429	0.0195181	2	2
Passerina_amoena	Passerina amoena	Lazuli Bunting	Emberizidae	0	0	1	1	96.3085	1.19033	50	5	0.297824	0.0139348	2	3
Passerina_caerulea	Passerina caerulea	Blue Grosbeak	Emberizidae	0	0	0	1	141.209	1.43775	100	10	0.356167	0.0116806	1	2
Passerina_ciris	Passerina ciris	Painted Bunting	Emberizidae	0	0	3	1	85.3838	1.19173	50	10	0.265504	0.0113271	2	3
Malurus_cyaneus	Malurus cyaneus	Superb Fairywren	Maluridae	1	0	0	1	165.431	1.01564	50	26	0.277	0.00721362	0	3
Passerina_leclancherii	Passerina leclancherii	Orange-breasted Bunting	Emberizidae	0	0	NA	1	69.2879	1.14613	40	35	0.781859	0.00205881	0	1
Passerina_rositae	Passerina rositae	Rose-bellied Bunting	Emberizidae	0	0	NA	1	92.0833	1.30103	0	56.5	0.437601	0.00274754	0	1
Malurus_elegans	Malurus elegans	Red-winged Fairywren	Maluridae	1	0	0	1	158.936	0.982271	50	7.5	0.437614	0.00608191	0	1
Pezopetes_capitalis	Pezopetes capitalis	Large-footed Finch	Emberizidae	0	0	0	1	10.4775	1.74663	40	54	0.334885	0.000680902	0	1
Phrygilus_alaudinus	Phrygilus alaudinus	Band-tailed Sierra-finch	Emberizidae	0	0	NA	1	71.102	1.405	90	9	0.503764	0.00278218	1	1
Phrygilus_atriceps	Phrygilus atriceps	Black-hooded Sierra-finch	Emberizidae	0	0	NA	1	47.9796	1.38561	100	5	0.526553	0.004484	0	1
Phrygilus_carbonarius	Phrygilus carbonarius	Carbonated Sierra-finch	Emberizidae	0	0	NA	1	186.055	1.25285	0	6	0.300265	0.00931739	1	1
Phrygilus_dorsalis	Phrygilus dorsalis	Red-backed Sierra-finch	Emberizidae	0	0	NA	1	19.447	1.58149	0	5	0.579557	0.0053352	0	0
Phrygilus_erythronotus	Phrygilus erythronotus	White-throated Sierra-finch	Emberizidae	0	0	NA	1	20.231	1.60746	20	5	0.574303	0.00390212	0	0
Phrygilus_fruticeti	Phrygilus fruticeti	Mourning Sierra-finch	Emberizidae	0	0	NA	1	96.6099	1.58883	0	5	0.35364	0.00705277	1	1
Phrygilus_gayi	Phrygilus gayi	Grey-hooded Sierra-finch	Emberizidae	0	0	NA	1	48.8826	1.40824	100	5	0.295974	0.00773122	1	1
Phrygilus_patagonicus	Phrygilus patagonicus	Patagonian Sierra-finch	Emberizidae	0	0	NA	1	25.6974	1.35411	0	23	0.215232	0.00596806	1	1
Phrygilus_plebejus	Phrygilus plebejus	Ash-breasted Sierra-finch	Emberizidae	0	0	NA	1	42.0449	1.16886	50	5	0.497464	0.00298586	0	1
Phrygilus_punensis	Phrygilus punensis	Peruvian Sierra-finch	Emberizidae	0	0	NA	1	39.8155	1.57054	100	14	0.416506	0.00157956	0	0
Phrygilus_unicolor	Phrygilus unicolor	Plumbeous Sierra-finch	Emberizidae	0	0	NA	1	32.8896	1.34044	0	7	0.408571	0.00380057	0	1
Piezorhina_cinerea	Piezorhina cinerea	Cinereous Finch	Emberizidae	0	0	NA	1	12.4731	1.50732	80	5	0.451832	0.00171308	0	1
Pinaroloxias_inornata	Pinaroloxias inornata	Cocos Finch	Emberizidae	0	0	0	1	161.229	1.11727	20	80	0.346177	0.00100929	0	1
Pipilo_aberti	Pipilo aberti	Abert's Towhee	Emberizidae	0	0	0	1	14.4369	1.66229	70	5	0.443226	0.0117648	0	0
Pipilo_albicollis	Pipilo albicollis	White-throated Towhee	Emberizidae	0	0	NA	1	14.7612	1.66652	30	38	0.680525	0.0020536	0	0
Pipilo_chlorurus	Pipilo chlorurus	Green-tailed Towhee	Emberizidae	0	0	0	1	19.163	1.46835	70	5	0.28718	0.0138534	1	2
Pipilo_crissalis	Pipilo crissalis	California Towhee	Emberizidae	0	0	0	1	9.69578	1.72304	50	12	0.604218	0.0082012	0	0
Pipilo_erythrophthalmus	Pipilo erythrophthalmus	Eastern Towhee	Emberizidae	0	0	0	1	52.4501	1.6026	80	45	0.168334	0.0140526	1	3
Pipilo_fuscus	Pipilo fuscus	Canyon Towhee	Emberizidae	0	0	0	1	25.0885	1.64738	50	6	0.450577	0.0093582	0	0
Pipilo_maculatus	Pipilo maculatus	Spotted Towhee	Emberizidae	0	0	0	1	40.4094	1.59439	70	5	0.315113	0.0135517	1	2
Pipilo_ocai	Pipilo ocai	Collared Towhee	Emberizidae	0	0	NA	1	11.4959	1.78569	60	28	0.737311	0.00279181	0	1
Platyspiza_crassirostris	Platyspiza crassirostris	Vegetarian Finch	Emberizidae	0	0	NA	1	110.843	1.55023	30	2.5	0.369269	0.00257831	0	1
Plectrophenax_hyperboreus	Plectrophenax hyperboreus	McKay's Bunting	Emberizidae	0	0	0	1	62.5535	1.7364	90	3	0.232552	0.0131985	2	1
Malurus_lamberti	Malurus lamberti	Variegated Fairywren	Maluridae	1	0	0	1	202.021	0.909941	0	5	0.464171	0.00849103	0	2
Pooecetes_gramineus	Pooecetes gramineus	Vesper Sparrow	Emberizidae	0	0	1	1	11.7462	1.40993	80	19	0.26342	0.0153491	1	3
Poospiza_alticola	Poospiza alticola	Plain-tailed Warbling-finch	Emberizidae	0	0	NA	1	14.4504	NA	40	26	0.319155	0.000620319	0	0
Poospiza_boliviana	Poospiza boliviana	Bolivian Warbling-finch	Emberizidae	0	0	NA	1	18.1686	NA	90	53	0.395909	0.00298586	0	1
Poospiza_cabanisi	Poospiza cabanisi	Grey-throated Warbling-finch	Emberizidae	0	0	NA	1	10.5227	1.29003	100	33	0.186366	0.00636252	0	1
Poospiza_caesar	Poospiza caesar	Chestnut-breasted Mountain-finch	Emberizidae	0	0	NA	1	19.2276	NA	50	37.5	0.495258	0.00177673	0	0
Poospiza_cinerea	Poospiza cinerea	Cinereous Warbling-finch	Emberizidae	0	0	NA	1	27.4314	1.06446	20	27	0.621639	0.00198988	0	1
Poospiza_erythrophrys	Poospiza erythrophrys	Rusty-browed Warbling-finch	Emberizidae	0	0	NA	1	9.27712	1.14922	90	55	0.622083	0.0056681	0	0
Poospiza_hispaniolensis	Poospiza hispaniolensis	Collared Warbling-finch	Emberizidae	0	0	NA	1	57.6126	1.21748	60	5	0.450925	0.00127658	0	1
Poospiza_hypochondria	Poospiza hypochondria	Rufous-sided Warbling-finch	Emberizidae	0	0	NA	1	16.3373	1.32634	90	24	0.531095	0.00539425	0	1
Poospiza_lateralis	Poospiza lateralis	Buff-throated Warbling-finch	Emberizidae	0	0	NA	1	12.687	1.2833	100	34	0.194224	0.00630697	0	1
Poospiza_melanoleuca	Poospiza melanoleuca	Black-capped Warbling-finch	Emberizidae	0	0	NA	1	34.0279	1.11727	50	45	0.417187	0.00638867	0	1
Poospiza_nigrorufa	Poospiza nigrorufa	Black-and-rufous Warbling-finch	Emberizidae	0	0	0	1	18.6689	1.24055	80	27	0.2526	0.00705486	1	0
Poospiza_ornata	Poospiza ornata	Cinnamon Warbling-finch	Emberizidae	0	0	NA	1	53.0049	1.07188	90	10	0.406208	0.00883414	1	1
Poospiza_rubecula	Poospiza rubecula	Rufous-breasted Warbling-finch	Emberizidae	0	0	NA	1	22.6675	NA	90	5	0.411264	0.00114401	0	0
Poospiza_thoracica	Poospiza thoracica	Bay-chested Warbling-finch	Emberizidae	0	0	NA	1	9.81957	1.07555	90	68	0.332495	0.00329484	0	1
Poospiza_torquata	Poospiza torquata	Ringed Warbling-finch	Emberizidae	0	0	NA	1	24.9114	1.04139	50	11	0.406458	0.00852536	1	1
Porphyrospiza_caerulescens	Porphyrospiza caerulescens	Blue Finch	Emberizidae	0	0	NA	1	120.05	1.11394	100	34	0.737269	0.00149802	0	1
Pselliophorus_luteoviridis	Pselliophorus luteoviridis	Yellow-green Finch	Emberizidae	0	0	NA	1	16.1988	NA	20	23	0.421136	0.000868537	0	0
Pselliophorus_tibialis	Pselliophorus tibialis	Yellow-thighed Finch	Emberizidae	0	0	NA	1	11.8057	1.47712	20	57	0.319181	0.000696478	0	0
Rhodospingus_cruentus	Rhodospingus cruentus	Crimson-breasted Finch	Emberizidae	0	0	NA	1	149.91	1.06446	0	8	0.552387	0.0011735	0	1
Rowettia_goughensis	Rowettia goughensis	Gough Bunting	Emberizidae	0	0	0	1	57.9583	1.72428	20	0	0.433345	0.00449611	0	1
Saltatricula_multicolor	Saltatricula multicolor	Many-coloured Chaco-finch	Emberizidae	0	0	NA	1	15.0411	1.34635	0	43	0.482689	0.00668505	0	1
Sicalis_auriventris	Sicalis auriventris	Greater Yellow-finch	Emberizidae	0	0	NA	1	98.5772	1.74036	20	5	0.304148	0.008209	0	1
Sicalis_citrina	Sicalis citrina	Stripe-tailed Yellow-finch	Emberizidae	0	0	NA	1	79.6076	1.06446	10	37	0.661672	0.00148683	0	1
Sicalis_columbiana	Sicalis columbiana	Orange-fronted Yellow-finch	Emberizidae	0	0	NA	1	118.07	1.1271	20	32	0.686983	0.00142992	0	1
Sicalis_flaveola	Sicalis flaveola	Saffron Finch	Emberizidae	0	0	0	1	70.6907	1.23236	40	33	0.44565	0.00260311	0	2
Sicalis_lebruni	Sicalis lebruni	Patagonian Yellow-finch	Emberizidae	0	0	NA	1	70.9618	1.40312	50	5	0.235379	0.00823001	0	1
Sicalis_lutea	Sicalis lutea	Puna Yellow-finch	Emberizidae	0	0	NA	1	13.7894	1.21085	10	5	0.588108	0.00388122	0	1
Sicalis_luteocephala	Sicalis luteocephala	Citron-headed Yellow-finch	Emberizidae	0	0	NA	1	26.88	NA	40	52.5	0.50018	0.00344452	0	1
Sicalis_luteola	Sicalis luteola	Grassland Yellow-finch	Emberizidae	0	0	NA	1	34.6558	1.2014	30	17	0.324548	0.00705188	1	2
Sicalis_olivascens	Sicalis olivascens	Greenish Yellow-finch	Emberizidae	0	0	NA	1	78.0196	1.33846	20	5	0.440716	0.00438301	0	1
Sicalis_raimondii	Sicalis raimondii	Raimondi's Yellow-finch	Emberizidae	0	0	NA	1	49.7645	1.19866	20	4.5	0.40285	0.00145323	0	0
Sicalis_taczanowskii	Sicalis taczanowskii	Sulphur-throated Finch	Emberizidae	0	0	NA	1	12.2872	NA	40	5	0.440071	0.00194261	0	0
Sicalis_uropygialis	Sicalis uropygialis	Bright-rumped Yellow-finch	Emberizidae	0	0	NA	1	65.5029	1.35218	10	5	0.554319	0.00325054	0	0
Spizella_arborea	Spizella arborea	American Tree Sparrow	Emberizidae	0	0	0	1	29.0735	1.25164	60	13	0.263429	0.0223986	2	3
Malurus_leucopterus	Malurus leucopterus	White-winged Fairywren	Maluridae	1	0	0	1	217.991	0.869232	40	5	0.414083	0.0089694	0	2
Spizella_breweri	Spizella breweri	Brewer's Sparrow	Emberizidae	0	0	0	1	17.5046	1.03743	100	6	0.272137	0.0139192	2	3
Spizella_pallida	Spizella pallida	Clay-coloured Sparrow	Emberizidae	0	0	0	1	14.1266	1.04922	80	42.5	0.269407	0.0184887	2	3
Malurus_melanocephalus	Malurus melanocephalus	Red-backed Fairywren	Maluridae	1	0	0	1	207.753	0.897627	70	16	0.860837	0.00468908	0	2
Spizella_pusilla	Spizella pusilla	Field Sparrow	Emberizidae	0	0	1	1	13.0583	1.09691	100	26	0.187717	0.0144223	1	3
Spizella_wortheni	Spizella wortheni	Worthen's Sparrow	Emberizidae	0	0	NA	1	10.753	1.09342	100	5	0.512694	0.005594	0	1
Sporophila_albogularis	Sporophila albogularis	White-throated Seedeater	Emberizidae	0	0	NA	1	102.107	0.986772	50	18	0.591833	0.00190837	0	1
Sporophila_americana	Sporophila americana	Wing-barred Seedeater	Emberizidae	0	0	0	1	149.252	1.07918	80	62.5	0.316803	0.000965211	0	1
Sporophila_ardesiaca	Sporophila ardesiaca	Dubois's Seedeater	Emberizidae	0	0	NA	1	117.948	1.03743	60	31	0.588621	0.00174939	0	1
Sporophila_bouvreuil	Sporophila bouvreuil	Capped Seedeater	Emberizidae	1	0	NA	1	54.6275	0.934498	50	30	0.5916	0.0020675	0	1
Sporophila_bouvronides	Sporophila bouvronides	Lesson's Seedeater	Emberizidae	0	0	0	1	109.897	0.959041	30	41.5	0.303892	0.000803778	1	1
Sporophila_caerulescens	Sporophila caerulescens	Double-collared Seedeater	Emberizidae	0	0	0	1	120.541	0.989005	50	49	0.418293	0.00224709	1	1
Sporophila_castaneiventris	Sporophila castaneiventris	Chestnut-bellied Seedeater	Emberizidae	0	0	NA	1	66.4685	0.892095	50	79	0.276758	0.000737032	0	1
Sporophila_cinnamomea	Sporophila cinnamomea	Chestnut Seedeater	Emberizidae	0	0	NA	1	121.489	NA	50	37	0.240255	0.0069343	2	1
Sporophila_collaris	Sporophila collaris	Rusty-collared Seedeater	Emberizidae	0	0	0	1	81.962	1.13033	0	37	0.447674	0.00302331	0	1
Sporophila_corvina	Sporophila corvina	Variable Seedeater	Emberizidae	0	0	NA	1	137.262	1.01608	90	53	0.310344	0.000951992	0	1
Sporophila_falcirostris	Sporophila falcirostris	Temminck's Seedeater	Emberizidae	0	0	NA	1	55.5147	NA	100	50	0.220971	0.00432076	0	1
Sporophila_frontalis	Sporophila frontalis	Buffy-fronted Seedeater	Emberizidae	0	0	NA	1	101.373	1.30963	100	53	0.220415	0.00454582	0	1
Sporophila_hypochroma	Sporophila hypochroma	Rufous-rumped Seedeater	Emberizidae	1	0	NA	1	104.622	0.986772	50	42.5	0.273859	0.00688296	1	1
Malurus_pulcherrimus	Malurus pulcherrimus	Blue-breasted Fairywren	Maluridae	1	0	0	1	139.546	0.963788	50	11.5	0.304963	0.00747258	0	1
Sporophila_intermedia	Sporophila intermedia	Grey Seedeater	Emberizidae	0	0	0	1	83.3156	1.08279	100	26	0.403226	0.000888018	0	1
Sporophila_leucoptera	Sporophila leucoptera	White-bellied Seedeater	Emberizidae	0	0	0	1	102.363	1.19033	70	33	0.545736	0.00197001	0	1
Sporophila_lineola	Sporophila lineola	Lined Seedeater	Emberizidae	0	0	0	1	174.308	0.991226	30	31	0.542718	0.00254502	1	1
Sporophila_luctuosa	Sporophila luctuosa	Black-and-white Seedeater	Emberizidae	0	0	NA	1	124.133	1.09691	40	32	0.321023	0.000832055	1	1
Sporophila_melanogaster	Sporophila melanogaster	Black-bellied Seedeater	Emberizidae	1	0	NA	1	161.637	0.968483	50	67	0.170042	0.00508414	2	0
Sporophila_minuta	Sporophila minuta	Ruddy-breasted Seedeater	Emberizidae	0	0	0	1	70.4641	0.892095	50	39	0.375344	0.000913641	0	1
Sporophila_murallae	Sporophila murallae	Caqueta Seedeater	Emberizidae	0	0	NA	1	107.53	NA	40	80	0.146434	0.000687709	0	1
Sporophila_nigricollis	Sporophila nigricollis	Yellow-bellied Seedeater	Emberizidae	0	0	0	1	92.5599	0.982271	30	59	0.315269	0.000820905	0	1
Sporophila_nigrorufa	Sporophila nigrorufa	Black-and-tawny Seedeater	Emberizidae	0	0	NA	1	97.9161	NA	50	76	0.469679	0.00239475	0	1
Sporophila_palustris	Sporophila palustris	Marsh Seedeater	Emberizidae	1	0	NA	1	105.203	0.916454	50	28	0.20451	0.00686614	2	1
Sporophila_peruviana	Sporophila peruviana	Parrot-billed Seedeater	Emberizidae	0	0	NA	1	78.4807	1.10037	60	5	0.519801	0.00153332	0	1
Sporophila_plumbea	Sporophila plumbea	Plumbeous Seedeater	Emberizidae	0	0	NA	1	71.0578	0.986772	100	40	0.546639	0.00158442	0	1
Sporophila_ruficollis	Sporophila ruficollis	Dark-throated Seedeater	Emberizidae	1	0	NA	1	128.456	0.934498	50	42	0.37099	0.00669039	2	1
Sporophila_schistacea	Sporophila schistacea	Slate-coloured Seedeater	Emberizidae	0	0	NA	0	63.6853	1.1038	80	75	0.368735	0.000875761	0	1
Sporophila_simplex	Sporophila simplex	Drab Seedeater	Emberizidae	1	0	NA	1	24.3501	NA	70	7	0.383168	0.000779011	0	1
Sporophila_telasco	Sporophila telasco	Chestnut-throated Seedeater	Emberizidae	0	0	NA	1	69.3162	0.982271	60	5	0.42419	0.00139607	0	1
Malurus_splendens	Malurus splendens	Splendid Fairywren	Maluridae	1	0	0	1	203.508	0.991315	60	5	0.399783	0.0091397	0	3
Tiaris_bicolor	Tiaris bicolor	Black-faced Grassquit	Emberizidae	0	0	0	1	93.4292	0.991226	70	21	0.323457	0.00110165	0	2
Tiaris_canorus	Tiaris canorus	Cuban Grassquit	Emberizidae	0	0	NA	1	37.4676	0.908485	60	14	0.334613	0.00257087	0	1
Tiaris_fuliginosus	Tiaris fuliginosus	Sooty Grassquit	Emberizidae	0	0	0	1	59.6824	1.12385	100	28	0.337444	0.0028858	0	0
Tiaris_obscurus	Tiaris obscurus	Dull-coloured Grassquit	Emberizidae	0	0	NA	1	11.4675	1.04922	70	47	0.383183	0.00216457	1	1
Tiaris_olivaceus	Tiaris olivaceus	Yellow-faced Grassquit	Emberizidae	0	0	0	1	85.2219	0.929419	90	44	0.31829	0.00191062	0	1
Torreornis_inexpectata	Torreornis inexpectata	Cuban Sparrow	Emberizidae	0	0	NA	1	15.5374	1.40654	70	14.5	0.303968	0.002051	0	1
Urothraupis_stolzmanni	Urothraupis stolzmanni	Black-backed Bush-finch	Emberizidae	0	0	NA	1	8.1854	1.36361	0	18	0.228678	0.000562727	0	1
Volatinia_jacarina	Volatinia jacarina	Blue-black Grassquit	Emberizidae	0	0	0	1	143.605	0.997823	100	52	0.401305	0.00128576	0	2
Xenospingus_concolor	Xenospingus concolor	Slender-billed Finch	Emberizidae	0	0	NA	1	8.73807	1.32222	80	0	0.358382	0.00199507	0	1
Xenospiza_baileyi	Xenospiza baileyi	Sierra Madre Sparrow	Emberizidae	0	0	0	1	29.6794	1.24055	70	23	0.706636	0.00405001	0	1
Cisticola_cinereolus	Cisticola cinereolus	Ashy Cisticola	Cisticolidae	1	1	2	1	42.3512	1.233	100	5	0.499084	0.00190637	0	0
Cisticola_exilis	Cisticola exilis	Golden-headed Cisticola	Cisticolidae	1	1	3	0	33.3751	0.848189	80	20	0.497552	0.00502312	0	1
Zonotrichia_capensis	Zonotrichia capensis	Rufous-collared Sparrow	Emberizidae	0	0	0	1	18.1829	1.30846	100	28	0.425087	0.00278337	0	3
Zonotrichia_leucophrys	Zonotrichia leucophrys	White-crowned Sparrow	Emberizidae	0	0	2	1	16.6929	1.45509	80	15	0.258744	0.0205901	1	3
Zonotrichia_querula	Zonotrichia querula	Harris's Sparrow	Emberizidae	0	0	0	1	28.102	1.55084	90	5	0.285502	0.0254511	2	3
Amadina_erythrocephala	Amadina erythrocephala	Red-headed Finch	Estrildidae	0	0	0	1	87.5231	1.35218	100	5	0.644487	0.00655779	0	2
Amadina_fasciata	Amadina fasciata	Cut-throat	Estrildidae	0	0	0	1	97.7743	1.25527	100	10	0.779344	0.00329816	0	2
Epthianura_tricolor	Epthianura tricolor	Crimson Chat	Meliphagidae	1	0	0	1	103.589	1.02938	80	5	0.342114	0.00933667	2	1
Amandava_formosa	Amandava formosa	Green Avadavat	Estrildidae	0	0	0	1	71.7735	0.963788	100	12	0.764538	0.00667628	0	2
Amandava_subflava	Amandava subflava	Zebra Waxbill	Estrildidae	0	0	0	1	85.0207	0.872156	50	29	0.706937	0.00223908	0	2
Clytospiza_monteiri	Clytospiza monteiri	Brown Twinspot	Estrildidae	0	0	0	1	54.7473	1.17319	100	47	0.454589	0.00139428	0	1
Cryptospiza_jacksoni	Cryptospiza jacksoni	Dusky Crimson-wing	Estrildidae	0	0	0	1	59.7581	1.11394	50	62.5	0.220937	0.000916268	0	0
Cryptospiza_reichenovii	Cryptospiza reichenovii	Red-faced Crimson-wing	Estrildidae	0	0	0	1	25.0192	1.09342	70	36	0.601695	0.00248894	0	1
Cryptospiza_salvadorii	Cryptospiza salvadorii	Abyssinian Crimson-wing	Estrildidae	0	0	0	1	91.7431	1.08636	50	16	0.384345	0.00138963	0	1
Cryptospiza_shelleyi	Cryptospiza shelleyi	Shelley's Crimson-wing	Estrildidae	0	0	NA	1	51.0403	1.24551	60	62.5	0.23133	0.000926664	0	1
Emblema_pictum	Emblema pictum	Painted Finch	Estrildidae	0	0	0	1	85.9937	1.01703	100	5	0.541031	0.00895448	0	1
Erythrura_coloria	Erythrura coloria	Red-eared Parrotfinch	Estrildidae	0	0	0	1	13.1025	1.05308	50	42	0.174665	0.000706518	0	1
Erythrura_cyaneovirens	Erythrura cyaneovirens	Red-headed Parrotfinch	Estrildidae	0	0	NA	1	46.3971	1.11394	0	5	0.281128	0.00156236	0	1
Erythrura_gouldiae	Erythrura gouldiae	Gouldian Finch	Estrildidae	0	0	0	1	70.5579	1.13988	20	15	0.929836	0.00412381	0	3
Erythrura_hyperythra	Erythrura hyperythra	Tawny-breasted Parrotfinch	Estrildidae	0	0	0	1	60.9229	1.04139	100	65	0.194756	0.000558184	0	1
Erythrura_kleinschmidti	Erythrura kleinschmidti	Pink-billed Parrotfinch	Estrildidae	0	0	NA	1	14.9022	1.32222	20	5	0.294662	0.00182447	0	1
Erythrura_papuana	Erythrura papuana	Papuan Parrotfinch	Estrildidae	0	0	NA	1	77.8609	1.2878	0	74.5	0.155873	0.000566807	0	1
Erythrura_prasina	Erythrura prasina	Pin-tailed Parrotfinch	Estrildidae	0	0	0	1	73.265	1.16732	50	56	0.189926	0.000595512	0	2
Erythrura_psittacea	Erythrura psittacea	Red-throated Parrotfinch	Estrildidae	0	0	NA	1	16.6836	1.0607	50	46	0.31715	0.00324406	0	1
Erythrura_trichroa	Erythrura trichroa	Blue-faced Parrotfinch	Estrildidae	0	0	0	1	72.1935	1.15836	50	69.5	0.172471	0.000615131	0	2
Erythrura_tricolor	Erythrura tricolor	Tricoloured Parrotfinch	Estrildidae	0	0	NA	1	86.5808	1.04139	60	47	0.494641	0.00122323	0	1
Erythrura_viridifacies	Erythrura viridifacies	Green-faced Parrotfinch	Estrildidae	0	0	NA	1	66.3986	1.10037	50	22	0.428739	0.00160813	0	1
Estrilda_astrild	Estrilda astrild	Common Waxbill	Estrildidae	0	0	0	1	60.3015	0.92774	50	28	0.608668	0.00218998	0	3
Estrilda_atricapilla	Estrilda atricapilla	Black-headed Waxbill	Estrildidae	0	0	0	1	19.6215	0.892095	100	62	0.370041	0.00119422	0	1
Estrilda_caerulescens	Estrilda caerulescens	Lavender Waxbill	Estrildidae	0	0	0	1	13.6755	0.973128	33	15	0.918384	0.00276849	0	1
Estrilda_erythronotos	Estrilda erythronotos	Black-cheeked Waxbill	Estrildidae	0	0	0	1	70.4011	0.963788	50	7	0.517303	0.00189414	0	1
Estrilda_kandti	Estrilda kandti	Kandt's Waxbill	Estrildidae	0	0	0	1	40.7622	0.869232	40	31	0.418363	0.00167881	0	NA
Estrilda_melanotis	Estrilda melanotis	Swee Waxbill	Estrildidae	0	0	0	1	73.5487	0.816241	60	26	0.567388	0.00202927	0	2
Estrilda_melpoda	Estrilda melpoda	Orange-cheeked Waxbill	Estrildidae	0	0	0	1	25.9131	0.880814	50	37	0.517459	0.00167185	0	2
Estrilda_nonnula	Estrilda nonnula	Black-crowned Waxbill	Estrildidae	0	0	0	1	10.5878	0.886491	50	51.5	0.363707	0.00130963	0	1
Estrilda_paludicola	Estrilda paludicola	Fawn-breasted Waxbill	Estrildidae	0	0	0	1	57.7666	0.880814	50	39	0.732183	0.00175015	0	1
Estrilda_perreini	Estrilda perreini	Black-tailed Waxbill	Estrildidae	0	0	0	1	19.6966	0.869232	33	43	0.730405	0.00174644	0	1
Estrilda_poliopareia	Estrilda poliopareia	Anambra Waxbill	Estrildidae	0	0	NA	1	17.4073	0.873902	80	26	0.545213	0.00197886	0	1
Estrilda_quartinia	Estrilda quartinia	Yellow-bellied Waxbill	Estrildidae	0	0	0	1	30.314	0.826075	40	26	0.567388	0.00202927	0	NA
Estrilda_rhodopyga	Estrilda rhodopyga	Crimson-rumped Waxbill	Estrildidae	0	0	0	1	14.0247	0.886491	50	17	0.528421	0.00191943	0	1
Estrilda_rufibarba	Estrilda rufibarba	Arabian Waxbill	Estrildidae	0	0	NA	1	15.0286	0.929419	50	0	0.367532	0.00642798	0	1
Estrilda_thomensis	Estrilda thomensis	Cinderella Waxbill	Estrildidae	0	0	0	1	23.2694	0.880814	100	19	0.823286	0.00219975	0	0
Estrilda_troglodytes	Estrilda troglodytes	Black-rumped Waxbill	Estrildidae	0	0	0	1	33.8232	0.880814	50	18	0.809181	0.00259551	0	2
Euschistospiza_cinereovinacea	Euschistospiza cinereovinacea	Dusky Twinspot	Estrildidae	0	0	0	1	12.3085	1.07918	100	28	0.513758	0.00106073	0	0
Euschistospiza_dybowskii	Euschistospiza dybowskii	Dybowski's Twinspot	Estrildidae	0	0	0	1	39.2908	1.1271	100	45	0.544939	0.00188468	0	1
Heteromunia_pectoralis	Heteromunia pectoralis	Pictorella Munia	Estrildidae	0	0	0	1	36.116	1.18184	50	14	0.926221	0.00424109	0	1
Hypargos_margaritatus	Hypargos margaritatus	Pink-throated Twinspot	Estrildidae	0	0	0	1	91.8397	1.10721	100	30	0.42868	0.00441318	0	1
Hypargos_niveoguttatus	Hypargos niveoguttatus	Peters's Twinspot	Estrildidae	0	0	0	1	93.5653	1.16435	50	38	0.769728	0.0024141	0	1
Lagonosticta_larvata	Lagonosticta larvata	Black-throated Firefinch	Estrildidae	0	0	0	1	75.1968	0.995635	50	16	0.858714	0.00271671	0	1
Lagonosticta_nitidula	Lagonosticta nitidula	Brown Firefinch	Estrildidae	0	0	0	1	20.2582	1.02938	100	44	0.951723	0.00202918	0	1
Lagonosticta_rara	Lagonosticta rara	Black-bellied Firefinch	Estrildidae	0	0	0	1	62.9916	1.01703	100	42	0.524135	0.00192897	0	1
Lagonosticta_rhodopareia	Lagonosticta rhodopareia	Jameson's Firefinch	Estrildidae	0	0	0	1	50.055	0.968483	50	30	0.717997	0.00229128	0	2
Lagonosticta_rubricata	Lagonosticta rubricata	African Firefinch	Estrildidae	0	0	0	1	32.4423	1.00718	100	30	0.545047	0.00205045	0	2
Lagonosticta_rufopicta	Lagonosticta rufopicta	Bar-breasted Firefinch	Estrildidae	0	0	0	1	23.0985	0.968483	100	35.5	0.5779	0.00206376	0	2
Lagonosticta_sanguinodorsalis	Lagonosticta sanguinodorsalis	Rock Firefinch	Estrildidae	0	0	0	1	56.2419	1.0569	60	6	0.915509	0.00209496	0	1
Lagonosticta_senegala	Lagonosticta senegala	Red-billed Firefinch	Estrildidae	0	0	0	1	103.574	0.981057	100	14	0.72393	0.00284787	0	2
Lagonosticta_umbrinodorsalis	Lagonosticta umbrinodorsalis	Chad Firefinch	Estrildidae	0	0	NA	1	38.6054	1.02531	60	32	0.855122	0.00268261	0	NA
Lagonosticta_virata	Lagonosticta virata	Mali Firefinch	Estrildidae	0	0	0	1	23.9612	0.968483	100	5	0.922547	0.00398169	0	1
Lonchura_atricapilla	Lonchura atricapilla	Chestnut Munia	Estrildidae	0	0	0	1	30.528	1.09831	60	36	0.5469	0.00201845	0	1
Lonchura_bicolor	Lonchura bicolor	Black-and-white Munia	Estrildidae	0	0	0	1	20.2137	0.995635	50	42	0.482408	0.00154954	0	2
Lonchura_caniceps	Lonchura caniceps	Grey-headed Munia	Estrildidae	0	0	0	1	19.9182	0.90309	50	64	0.208448	0.000884652	0	1
Lonchura_cantans	Lonchura cantans	African Silverbill	Estrildidae	0	0	0	1	33.1989	1.07918	80	2	0.558845	0.00490104	0	1
Lonchura_castaneothorax	Lonchura castaneothorax	Chestnut-breasted Munia	Estrildidae	0	0	0	1	15.4591	1.13354	50	22	0.832705	0.00351866	0	2
Lonchura_cucullata	Lonchura cucullata	Bronze Munia	Estrildidae	0	0	0	1	20.5205	0.952167	60	32	0.591493	0.00196221	0	2
Lonchura_ferruginosa	Lonchura ferruginosa	White-capped Munia	Estrildidae	0	0	0	1	21.8728	1.11394	100	7	0.416544	0.00061355	0	0
Lonchura_flaviprymna	Lonchura flaviprymna	Yellow-rumped Munia	Estrildidae	0	0	0	1	16.7549	1.07188	50	14.5	0.942036	0.00383749	0	1
Lonchura_forbesi	Lonchura forbesi	New Ireland Munia	Estrildidae	0	0	NA	1	19.9286	1.12287	50	19	0.148932	0.000410018	0	0
Lonchura_fringilloides	Lonchura fringilloides	Magpie Munia	Estrildidae	0	0	0	1	26.1036	1.22531	0	42	0.515921	0.00172243	0	1
Lonchura_fuscans	Lonchura fuscans	Dusky Munia	Estrildidae	0	0	NA	1	29.455	0.977724	50	77	0.159201	0.000485033	0	1
Lonchura_grandis	Lonchura grandis	Grand Munia	Estrildidae	0	0	0	1	8.89848	1.13114	100	74	0.158272	0.000419226	0	1
Lonchura_griseicapilla	Lonchura griseicapilla	Grey-headed Silverbill	Estrildidae	0	0	0	1	19.0711	1.10721	0	16	0.44026	0.00171935	0	1
Lonchura_hunsteini	Lonchura hunsteini	Mottled Munia	Estrildidae	0	0	NA	1	26.3397	1.12287	50	8	0.148932	0.000410018	0	1
Lonchura_kelaarti	Lonchura kelaarti	Black-throated Munia	Estrildidae	0	0	0	1	20.7355	1.14922	50	25	0.647539	0.00160815	0	1
Lonchura_leucogastra	Lonchura leucogastra	White-bellied Munia	Estrildidae	0	0	0	1	14.6003	1.0569	50	34.5	0.216378	0.000647268	0	1
Lonchura_leucogastroides	Lonchura leucogastroides	Javan Munia	Estrildidae	0	0	0	1	20.367	1.06819	50	8	0.348785	0.000564644	0	1
Lonchura_maja	Lonchura maja	White-headed Munia	Estrildidae	0	0	0	1	38.7211	1.09691	50	20	0.189937	0.000586951	0	1
Lonchura_malabarica	Lonchura malabarica	White-throated Munia	Estrildidae	0	0	0	1	17.0339	1.07918	50	7	0.710576	0.00666556	0	3
Lonchura_malacca	Lonchura malacca	Tricoloured Munia	Estrildidae	0	0	0	1	25.776	1.10037	100	23	0.526495	0.00421985	0	3
Lonchura_melaena	Lonchura melaena	Bismarck Munia	Estrildidae	0	0	NA	1	23.7937	1.12287	100	61	0.15119	0.000595018	0	1
Lonchura_molucca	Lonchura molucca	Black-faced Munia	Estrildidae	0	0	NA	1	14.5226	1.07918	50	53	0.227694	0.000573021	0	1
Lonchura_montana	Lonchura montana	Snow Mountain Munia	Estrildidae	0	0	NA	1	42.2345	1.12287	100	55.5	0.161331	0.00056597	0	1
Lonchura_monticola	Lonchura monticola	Alpine Munia	Estrildidae	0	0	NA	1	17.7668	1.12287	50	66	0.207321	0.00083192	0	1
Lonchura_nana	Lonchura nana	Madagascar Munia	Estrildidae	0	0	0	1	18.7899	0.913814	50	13	0.613618	0.00321386	0	0
Lonchura_nevermanni	Lonchura nevermanni	Grey-crowned Munia	Estrildidae	0	0	0	1	43.3518	1.04922	100	59	0.365056	0.00119958	0	1
Lonchura_pallida	Lonchura pallida	Pale-headed Munia	Estrildidae	0	0	0	1	27.5953	1.07918	50	46.5	0.326688	0.000777714	0	1
Lonchura_punctulata	Lonchura punctulata	Scaly-breasted Munia	Estrildidae	0	0	0	1	22.729	1.13354	50	15	0.617915	0.00545595	0	3
Lonchura_quinticolor	Lonchura quinticolor	Five-coloured Munia	Estrildidae	0	0	0	1	16.1791	1.12287	50	24	0.520594	0.00100401	0	1
Lonchura_spectabilis	Lonchura spectabilis	Hooded Munia	Estrildidae	0	0	0	1	15.336	1.0607	50	75	0.139311	0.000417597	0	1
Lonchura_striata	Lonchura striata	White-rumped Munia	Estrildidae	0	0	0	1	23.3866	1.08991	50	19	0.537713	0.00583644	0	3
Lonchura_stygia	Lonchura stygia	Black Munia	Estrildidae	0	0	0	1	17.1773	1.04922	50	60	0.399562	0.000949425	0	1
Lonchura_teerinki	Lonchura teerinki	Black-breasted Munia	Estrildidae	0	0	0	1	30.0262	1.12287	50	61	0.149069	0.000643	0	1
Lonchura_tristissima	Lonchura tristissima	Streak-headed Munia	Estrildidae	0	0	0	1	39.6821	0.944483	50	71	0.155247	0.000437368	0	1
Lonchura_vana	Lonchura vana	Grey-banded Munia	Estrildidae	0	0	NA	1	27.3009	1.12287	60	77	0.158192	0.000493431	0	0
Mandingoa_nitidula	Mandingoa nitidula	Green-backed Twinspot	Estrildidae	0	0	0	1	73.2147	0.982271	50	39	0.529593	0.00167051	0	1
Neochmia_modesta	Neochmia modesta	Plum-headed Finch	Estrildidae	0	0	0	1	78.0282	1.10551	50	11	0.385483	0.00853052	0	1
Neochmia_phaeton	Neochmia phaeton	Crimson Finch	Estrildidae	0	0	0	1	113.889	1	33	16	0.895557	0.00429533	0	2
Neochmia_ruficauda	Neochmia ruficauda	Star Finch	Estrildidae	0	0	0	1	48.2015	1.04727	50	16	0.878449	0.00395341	0	2
Neochmia_temporalis	Neochmia temporalis	Red-browed Finch	Estrildidae	0	0	0	1	9.63221	1.0569	100	24	0.360103	0.00620969	0	2
Nesocharis_ansorgei	Nesocharis ansorgei	White-collared Oliveback	Estrildidae	0	0	0	1	54.1706	0.924279	50	44	0.228235	0.00100614	0	1
Nesocharis_capistrata	Nesocharis capistrata	White-cheeked Oliveback	Estrildidae	0	0	0	1	31.6942	1.06446	100	44	0.418289	0.00162635	0	1
Nesocharis_shelleyi	Nesocharis shelleyi	Fernando Po Oliveback	Estrildidae	0	0	0	1	58.0102	0.880814	40	44	0.717341	0.00225532	0	1
Nigrita_bicolor	Nigrita bicolor	Chestnut-breasted Negrofinch	Estrildidae	0	0	0	1	53.7358	1.02119	25	66	0.338252	0.00103272	0	1
Nigrita_canicapillus	Nigrita canicapillus	Grey-headed Negrofinch	Estrildidae	0	0	0	1	71.2767	1.27184	0	53	0.364109	0.00114673	0	0
Nigrita_fusconotus	Nigrita fusconotus	White-breasted Negrofinch	Estrildidae	0	0	0	1	34.4243	0.959041	50	64	0.319816	0.000995748	0	0
Nigrita_luteifrons	Nigrita luteifrons	Pale-fronted Negrofinch	Estrildidae	0	0	0	1	101.26	1.12057	33	76	0.296886	0.000963258	0	1
Oreostruthus_fuliginosus	Oreostruthus fuliginosus	Mountain Firetail	Estrildidae	0	0	NA	1	61.8838	1.26245	50	65.5	0.153637	0.000571835	0	1
Ortygospiza_atricollis	Ortygospiza atricollis	Quailfinch	Estrildidae	0	0	0	1	70.0944	1.02531	100	17	0.753375	0.0027606	0	1
Ortygospiza_locustella	Ortygospiza locustella	Locust Finch	Estrildidae	0	0	0	1	144.523	0.90309	50	48	0.899034	0.00208722	0	1
Padda_fuscata	Padda fuscata	Timor Sparrow	Estrildidae	0	0	NA	1	41.4187	1.31597	50	39.5	0.547274	0.00129845	0	1
Padda_oryzivora	Padda oryzivora	Java Sparrow	Estrildidae	0	0	0	1	16.462	1.39445	50	5.5	0.426977	0.000602205	0	2
Parmoptila_jamesoni	Parmoptila jamesoni	Jameson's Antpecker	Estrildidae	0	0	NA	1	72.9935	0.977724	0	80	0.2001	0.000912976	0	1
Parmoptila_rubrifrons	Parmoptila rubrifrons	Red-fronted Antpecker	Estrildidae	0	0	0	1	97.4849	0.977724	0	77	0.207063	0.000920656	0	1
Parmoptila_woodhousei	Parmoptila woodhousei	Woodhouse's Antpecker	Estrildidae	0	0	0	1	36.9264	0.973128	50	58	0.427971	0.000990971	0	1
Poephila_acuticauda	Poephila acuticauda	Long-tailed Finch	Estrildidae	0	0	0	1	14.4515	1.14613	100	10	0.890374	0.0047339	0	2
Poephila_cincta	Poephila cincta	Black-throated Finch	Estrildidae	0	0	0	1	17.9293	1.17319	100	21	0.55264	0.00535743	0	2
Poephila_personata	Poephila personata	Masked Finch	Estrildidae	0	0	0	1	12.7661	1.11394	100	13	0.894207	0.00446261	0	2
Pyrenestes_minor	Pyrenestes minor	Lesser Seedcracker	Estrildidae	0	0	0	1	51.1724	1.20412	50	39	0.650954	0.00271341	0	1
Pyrenestes_ostrinus	Pyrenestes ostrinus	Black-bellied Seedcracker	Estrildidae	0	0	0	1	66.0992	1.34623	50	56	0.42807	0.00117934	0	2
Pyrenestes_sanguineus	Pyrenestes sanguineus	Crimson Seedcracker	Estrildidae	0	0	0	1	40.6848	1.2833	100	24	0.461809	0.00147903	0	1
Pytilia_afra	Pytilia afra	Orange-winged Pytilia	Estrildidae	0	0	0	1	63.4867	1.22011	100	37	0.658158	0.00177528	0	1
Pytilia_hypogrammica	Pytilia hypogrammica	Red-faced Pytilia	Estrildidae	0	0	0	1	73.7229	1.17026	100	19	0.578279	0.00212788	0	1
Pytilia_lineata	Pytilia lineata	Red-billed Pytilia	Estrildidae	0	0	NA	1	58.6656	1.15534	100	16	0.704534	0.00232203	0	NA
Pytilia_melba	Pytilia melba	Green-winged Pytilia	Estrildidae	0	0	0	1	93.0686	1.18752	60	16	0.771253	0.00278993	0	2
Pytilia_phoenicoptera	Pytilia phoenicoptera	Red-winged Pytilia	Estrildidae	0	0	0	1	29.4167	1.16137	100	23	0.664313	0.00227427	0	1
Spermophaga_haematina	Spermophaga haematina	Western Bluebill	Estrildidae	0	0	0	1	55.9815	1.36173	50	58.5	0.35491	0.00112505	0	1
Spermophaga_poliogenys	Spermophaga poliogenys	Grant's Bluebill	Estrildidae	0	0	0	1	108.701	1.29667	100	79	0.201563	0.000885203	0	1
Spermophaga_ruficapilla	Spermophaga ruficapilla	Red-headed Bluebill	Estrildidae	0	0	0	1	40.874	1.37291	50	45	0.423693	0.00135359	0	1
Stagonopleura_bella	Stagonopleura bella	Beautiful Firetail	Estrildidae	0	0	0	1	45.6338	1.14613	50	49	0.210464	0.00591395	0	1
Stagonopleura_guttata	Stagonopleura guttata	Diamond Firetail	Estrildidae	0	0	0	1	72.6002	1.24551	80	18	0.305864	0.00759731	0	1
Stagonopleura_oculata	Stagonopleura oculata	Red-eared Firetail	Estrildidae	0	0	0	1	38.5729	1.11059	20	20	0.343689	0.00572517	0	1
Taeniopygia_bichenovii	Taeniopygia bichenovii	Double-barred Finch	Estrildidae	0	0	0	1	25.6368	0.982271	50	14	0.671885	0.00577354	0	1
Taeniopygia_guttata	Taeniopygia guttata	Zebra Finch	Estrildidae	0	0	0	1	79.6376	1.08099	0	5	0.445801	0.00849193	0	3
Uraeginthus_angolensis	Uraeginthus angolensis	Blue-breasted Cordonbleu	Estrildidae	0	0	0	1	25.5835	0.995635	100	36	0.748962	0.00241624	0	2
Uraeginthus_bengalus	Uraeginthus bengalus	Red-cheeked Cordonbleu	Estrildidae	0	0	0	1	20.58	0.995635	100	16	0.761801	0.00246526	0	2
Uraeginthus_cyanocephalus	Uraeginthus cyanocephalus	Blue-capped Cordonbleu	Estrildidae	0	0	0	1	93.4107	0.991226	100	11	0.520881	0.00177066	0	1
Uraeginthus_granatinus	Uraeginthus granatinus	Common Grenadier	Estrildidae	0	0	0	1	159.123	1.07188	80	12	0.748849	0.00479304	0	0
Uraeginthus_ianthinogaster	Uraeginthus ianthinogaster	Purple Grenadier	Estrildidae	0	0	0	1	95.5642	1.14922	100	8	0.509346	0.0016745	0	1
Androphobus_viridis	Androphobus viridis	Papuan Whipbird	Eupetidae	0	0	NA	1	41.5131	1.61278	100	63	0.128836	0.000613542	0	0
Eupetes_macrocerus	Eupetes macrocerus	Rail-babbler	Eupetidae	0	0	NA	1	9.85905	1.83885	100	54	0.164183	0.000617559	0	1
Psophodes_cristatus	Psophodes cristatus	Chirruping Wedgebill	Eupetidae	0	0	0	1	12.2431	1.61013	80	5	0.335105	0.00980749	0	1
Psophodes_nigrogularis	Psophodes nigrogularis	Western Whipbird	Eupetidae	0	0	0	1	13.4444	1.64885	80	20	0.317899	0.00580923	0	1
Psophodes_occidentalis	Psophodes occidentalis	Chiming Wedgebill	Eupetidae	0	0	0	1	18.3679	1.59988	100	5	0.462668	0.00934138	0	1
Psophodes_olivaceus	Psophodes olivaceus	Eastern Whipbird	Eupetidae	0	0	0	1	7.36338	1.79657	70	46.5	0.306557	0.00588774	0	2
Ptilorrhoa_caerulescens	Ptilorrhoa caerulescens	Blue Jewel-babbler	Eupetidae	0	0	0	1	13.5907	1.6902	100	76	0.167164	0.000687947	0	1
Ptilorrhoa_castanonota	Ptilorrhoa castanonota	Chestnut-backed Jewel-babbler	Eupetidae	0	0	NA	1	24.8129	1.84323	100	73.5	0.158788	0.000510771	0	1
Ptilorrhoa_leucosticta	Ptilorrhoa leucosticta	Spotted Jewel-babbler	Eupetidae	0	0	0	1	30.4778	1.69197	100	65	0.154238	0.000554368	0	1
Calyptomena_hosii	Calyptomena hosii	Hose's Broadbill	Eurylaimidae	0	0	NA	0	91.4115	2.00108	0	80	0.133701	0.000505288	0	0
Calyptomena_viridis	Calyptomena viridis	Asian Green Broadbill	Eurylaimidae	0	0	2	0	62.2676	1.76716	10	60	0.16985	0.000557722	0	1
Calyptomena_whiteheadi	Calyptomena whiteheadi	Whitehead's Broadbill	Eurylaimidae	0	0	NA	0	34.9016	2.19451	0	80	0.134494	0.000556233	0	1
Corydon_sumatranus	Corydon sumatranus	Dusky Broadbill	Eurylaimidae	0	0	0	1	28.0745	2.14613	0	50	0.244963	0.000700978	0	0
Cymbirhynchus_macrorhynchos	Cymbirhynchus macrorhynchos	Black-and-red Broadbill	Eurylaimidae	0	0	0	1	14.4113	1.77379	60	53	0.19035	0.000596098	0	1
Eurylaimus_javanicus	Eurylaimus javanicus	Banded Broadbill	Eurylaimidae	0	0	0	1	58.2514	1.89321	10	48	0.265921	0.000687968	0	1
Eurylaimus_ochromalus	Eurylaimus ochromalus	Black-and-yellow Broadbill	Eurylaimidae	0	0	NA	1	54.6084	1.52244	0	60	0.16988	0.000556588	0	1
Eurylaimus_samarensis	Eurylaimus samarensis	Visayan Broadbill	Eurylaimidae	0	0	NA	1	62.2981	1.43297	0	5	0.238398	0.00102758	0	1
Eurylaimus_steerii	Eurylaimus steerii	Mindanao Broadbill	Eurylaimidae	0	0	NA	1	73.8366	1.59162	0	41	0.191358	0.000789349	0	0
Psarisomus_dalhousiae	Psarisomus dalhousiae	Long-tailed Broadbill	Eurylaimidae	0	0	0	1	31.2385	1.82607	33	44	0.579428	0.00434841	0	1
Pseudocalyptomena_graueri	Pseudocalyptomena graueri	African Green Broadbill	Eurylaimidae	0	0	NA	1	16.3284	1.50243	0	38	0.296782	0.00106073	0	1
Serilophus_lunatus	Serilophus lunatus	Silver-breasted Broadbill	Eurylaimidae	0	0	0	1	44.6971	1.53148	33	42	0.605124	0.00445658	0	1
Smithornis_capensis	Smithornis capensis	African Broadbill	Eurylaimidae	0	0	0	1	55.5963	1.36549	20	41	0.588091	0.00196649	0	2
Smithornis_rufolateralis	Smithornis rufolateralis	Rufous-sided Broadbill	Eurylaimidae	0	0	0	1	69.7473	1.28103	0	71	0.324088	0.00112314	0	1
Smithornis_sharpei	Smithornis sharpei	Grey-headed Broadbill	Eurylaimidae	0	0	0	1	66.7589	1.57403	40	80	0.284313	0.00105045	0	1
Eulacestoma_nigropectus	Eulacestoma nigropectus	Wattled Ploughbill	Falcunculidae	0	0	0	1	61.6234	1.30103	50	63	0.145903	0.00052625	0	0
Falcunculus_frontatus	Falcunculus frontatus	Crested Shrike-tit	Falcunculidae	0	0	0	1	36.2853	1.44793	0	18	0.302084	0.0072614	0	2
Chamaeza_campanisona	Chamaeza campanisona	Short-tailed Antthrush	Formicariidae	0	0	NA	1	25.8074	1.95904	80	45	0.308148	0.00270414	0	1
Chamaeza_meruloides	Chamaeza meruloides	Such's Antthrush	Formicariidae	0	0	NA	1	37.4678	1.83885	100	44	0.367864	0.00309703	0	1
Chamaeza_mollissima	Chamaeza mollissima	Barred Antthrush	Formicariidae	0	0	NA	1	12.7434	1.85733	100	51	0.329176	0.00140396	0	1
Chamaeza_nobilis	Chamaeza nobilis	Striated Antthrush	Formicariidae	0	0	NA	1	24.1754	2.08991	100	79	0.267626	0.00068223	0	1
Chamaeza_ruficauda	Chamaeza ruficauda	Rufous-tailed Antthrush	Formicariidae	0	0	NA	1	28.7127	1.85248	100	50	0.21774	0.00448179	0	1
Chamaeza_turdina	Chamaeza turdina	Schwartz's Antthrush	Formicariidae	0	0	NA	1	24.5824	1.99489	100	25.5	0.389222	0.000712531	0	0
Formicarius_analis	Formicarius analis	Black-faced Antthrush	Formicariidae	0	0	0	1	10.4385	1.79379	100	78	0.340721	0.000835173	0	1
Formicarius_colma	Formicarius colma	Rufous-capped Antthrush	Formicariidae	0	0	NA	1	96.464	1.6721	80	78	0.33095	0.000875997	0	1
Formicarius_moniliger	Formicarius moniliger	Mayan Antthrush	Formicariidae	0	0	NA	1	9.63394	1.79344	100	65	0.340451	0.00272772	0	NA
Formicarius_nigricapillus	Formicarius nigricapillus	Black-headed Antthrush	Formicariidae	0	0	0	1	10.5671	1.74974	100	36.5	0.228254	0.000608197	0	0
Formicarius_rufifrons	Formicarius rufifrons	Rufous-fronted Antthrush	Formicariidae	0	0	NA	1	7.11504	1.74429	100	80	0.368424	0.00117759	0	1
Formicarius_rufipectus	Formicarius rufipectus	Rufous-breasted Antthrush	Formicariidae	0	0	NA	1	19.9105	1.87157	100	36	0.290986	0.00077661	0	1
Grallaria_albigula	Grallaria albigula	White-throated Antpitta	Formicariidae	0	0	NA	1	15.4708	1.97772	100	61	0.41629	0.00292702	0	0
Grallaria_alleni	Grallaria alleni	Moustached Antpitta	Formicariidae	0	0	NA	1	15.5617	1.84819	100	27	0.230127	0.000577816	0	1
Grallaria_andicolus	Grallaria andicolus	Stripe-headed Antpitta	Formicariidae	0	0	NA	1	30.2961	1.75587	70	28	0.367333	0.0013462	0	0
Grallaria_bangsi	Grallaria bangsi	Santa Marta Antpitta	Formicariidae	0	0	NA	1	30.0134	1.79239	100	11	0.514063	0.000678543	0	1
Grallaria_blakei	Grallaria blakei	Chestnut Antpitta	Formicariidae	0	0	NA	1	15.832	1.62839	100	45	0.290186	0.000894056	0	1
Grallaria_capitalis	Grallaria capitalis	Bay Antpitta	Formicariidae	0	0	NA	1	14.1001	1.86747	100	23	0.300825	0.00126311	0	0
Grallaria_carrikeri	Grallaria carrikeri	Pale-billed Antpitta	Formicariidae	0	0	0	1	7.29662	2.04139	100	15.5	0.343511	0.000700275	0	1
Grallaria_chthonia	Grallaria chthonia	Tachira Antpitta	Formicariidae	0	0	NA	1	19.6491	1.93217	100	12.5	0.2548	0.00132712	0	0
Grallaria_dignissima	Grallaria dignissima	Ochre-striped Antpitta	Formicariidae	0	0	NA	1	24.0243	2.04139	100	79	0.137669	0.000743173	0	0
Grallaria_eludens	Grallaria eludens	Elusive Antpitta	Formicariidae	0	0	NA	1	24.1411	2.0607	100	80	0.199592	0.000622928	0	0
Grallaria_erythroleuca	Grallaria erythroleuca	Red-and-white Antpitta	Formicariidae	0	0	NA	1	13.9543	1.90309	100	43	0.488515	0.00167306	0	0
Grallaria_erythrotis	Grallaria erythrotis	Rufous-faced Antpitta	Formicariidae	0	0	NA	1	15.1089	1.75587	100	63	0.327864	0.00239923	0	0
Grallaria_excelsa	Grallaria excelsa	Great Antpitta	Formicariidae	0	0	NA	1	22.3226	2.38382	100	15	0.343302	0.000849229	0	1
Grallaria_flavotincta	Grallaria flavotincta	Yellow-breasted Antpitta	Formicariidae	0	0	NA	1	20.8488	1.79934	100	13.5	0.220299	0.000563344	0	1
Grallaria_gigantea	Grallaria gigantea	Giant Antpitta	Formicariidae	0	0	NA	1	14.4365	2.37291	100	11	0.331285	0.000613288	0	0
Grallaria_griseonucha	Grallaria griseonucha	Grey-naped Antpitta	Formicariidae	0	0	NA	1	12.5417	1.93217	100	12	0.27091	0.00113764	0	0
Grallaria_guatimalensis	Grallaria guatimalensis	Scaled Antpitta	Formicariidae	0	0	0	1	18.1	1.97405	80	59.5	0.332625	0.000936013	0	1
Grallaria_haplonota	Grallaria haplonota	Plain-backed Antpitta	Formicariidae	0	0	NA	1	17.3584	1.92942	100	27.5	0.207077	0.000741853	0	1
Grallaria_hypoleuca	Grallaria hypoleuca	White-bellied Antpitta	Formicariidae	0	0	NA	1	23.9941	1.86747	100	35	0.21351	0.000601499	0	1
Grallaria_kaestneri	Grallaria kaestneri	Cundinamarca Antpitta	Formicariidae	0	0	NA	1	12.0514	1.67669	100	20	0.196139	0.000563551	0	1
Grallaria_milleri	Grallaria milleri	Brown-banded Antpitta	Formicariidae	0	0	0	1	29.8912	1.72016	100	24	0.191182	0.0006202	0	1
Grallaria_nuchalis	Grallaria nuchalis	Chestnut-naped Antpitta	Formicariidae	0	0	NA	1	21.6822	2.06819	100	22	0.20364	0.00058875	0	1
Grallaria_przewalskii	Grallaria przewalskii	Rusty-tinged Antpitta	Formicariidae	0	0	NA	1	18.5757	1.81425	100	24	0.279676	0.000884914	0	1
Grallaria_quitensis	Grallaria quitensis	Tawny Antpitta	Formicariidae	0	0	0	1	14.2824	1.81757	100	45	0.209344	0.000612052	0	1
Grallaria_ridgelyi	Grallaria ridgelyi	Jocotoco Antpitta	Formicariidae	0	0	NA	1	9.18235	2.25406	100	51	0.21159	0.000583618	0	1
Grallaria_ruficapilla	Grallaria ruficapilla	Chestnut-crowned Antpitta	Formicariidae	0	0	NA	1	20.3042	1.91751	100	27	0.2446	0.000645725	0	1
Grallaria_rufocinerea	Grallaria rufocinerea	Bicoloured Antpitta	Formicariidae	0	0	NA	1	11.8436	1.65128	100	25	0.233524	0.000536381	0	1
Grallaria_rufula	Grallaria rufula	Rufous Antpitta	Formicariidae	0	0	NA	1	12.3517	1.55267	100	27	0.308364	0.000832055	0	1
Grallaria_squamigera	Grallaria squamigera	Undulated Antpitta	Formicariidae	0	0	NA	1	18.9882	2.13354	100	56	0.289178	0.000876286	0	1
Grallaria_varia	Grallaria varia	Variegated Antpitta	Formicariidae	0	0	0	1	30.5804	2.07555	100	73	0.316083	0.00102906	0	1
Grallaria_watkinsi	Grallaria watkinsi	Watkins's Antpitta	Formicariidae	0	0	NA	1	21.0401	1.85126	100	8	0.569564	0.0012655	0	1
Grallaricula_cucullata	Grallaricula cucullata	Hooded Antpitta	Formicariidae	0	0	NA	1	16.7156	1.25959	50	13	0.21201	0.000603855	0	1
Grallaricula_ferrugineipectus	Grallaricula ferrugineipectus	Rusty-breasted Antpitta	Formicariidae	0	0	0	1	23.8667	1.23553	100	38	0.334396	0.000983824	0	1
Grallaricula_flavirostris	Grallaricula flavirostris	Ochre-breasted Antpitta	Formicariidae	0	0	0	1	14.3489	1.24797	60	51	0.261189	0.000802228	0	1
Grallaricula_lineifrons	Grallaricula lineifrons	Crescent-faced Antpitta	Formicariidae	0	0	NA	1	26.453	1.32428	50	5	0.258008	0.000597426	0	1
Grallaricula_loricata	Grallaricula loricata	Scallop-breasted Antpitta	Formicariidae	0	0	NA	1	20.8748	1.31597	50	31	0.456921	0.00080551	0	1
Grallaricula_nana	Grallaricula nana	Slate-crowned Antpitta	Formicariidae	0	0	NA	1	17.529	1.29667	0	26	0.243138	0.000622933	0	1
Grallaricula_ochraceifrons	Grallaricula ochraceifrons	Ochre-fronted Antpitta	Formicariidae	0	0	NA	1	49.0467	1.36455	70	63	0.194606	0.00101232	0	1
Grallaricula_peruviana	Grallaricula peruviana	Peruvian Antpitta	Formicariidae	0	0	NA	1	45.5301	1.27416	70	37	0.21656	0.000645195	0	1
Hylopezus_auricularis	Hylopezus auricularis	Masked Antpitta	Formicariidae	0	0	NA	1	12.8653	1.60746	90	78.5	0.448676	0.000811736	0	1
Hylopezus_berlepschi	Hylopezus berlepschi	Amazonian Antpitta	Formicariidae	0	0	NA	1	28.1593	1.68124	80	79	0.406003	0.000923699	0	0
Hylopezus_dives	Hylopezus dives	Thicket Antpitta	Formicariidae	0	0	NA	1	10.7483	1.64345	80	64.5	0.252324	0.000588591	0	0
Hylopezus_fulviventris	Hylopezus fulviventris	White-lored Antpitta	Formicariidae	0	0	NA	1	17.0141	1.61278	80	80	0.140704	0.000720335	0	1
Hylopezus_macularius	Hylopezus macularius	Spotted Antpitta	Formicariidae	0	0	NA	1	20.6142	1.64542	100	77	0.315884	0.000837061	0	1
Hylopezus_nattereri	Hylopezus nattereri	Speckle-breasted Antpitta	Formicariidae	0	0	NA	1	25.5219	1.50515	100	59	0.186328	0.00503829	0	1
Hylopezus_ochroleucus	Hylopezus ochroleucus	White-browed Antpitta	Formicariidae	0	0	NA	1	20.8485	1.44716	100	28	0.618091	0.00204817	0	1
Hylopezus_perspicillatus	Hylopezus perspicillatus	Spectacled Antpitta	Formicariidae	0	0	0	1	13.11	1.63347	80	58	0.289263	0.000640059	0	1
Myrmothera_campanisona	Myrmothera campanisona	Thrush-like Antpitta	Formicariidae	0	0	NA	1	22.5086	1.6721	100	79	0.266992	0.000765008	0	1
Myrmothera_simplex	Myrmothera simplex	Brown-breasted Antpitta	Formicariidae	0	0	0	1	16.77	1.71933	100	78	0.270064	0.000713312	0	1
Pittasoma_michleri	Pittasoma michleri	Black-crowned Antpitta	Formicariidae	0	0	0	1	50.6349	2.03743	100	62.5	0.363532	0.000545674	0	0
Pittasoma_rufopileatum	Pittasoma rufopileatum	Rufous-crowned Antpitta	Formicariidae	0	0	NA	1	64.2561	1.98453	100	43	0.17283	0.000555592	0	0
Skutchia_borbae	Skutchia borbae	Pale-faced Antbird	Formicariidae	0	0	0	1	9.9164	1.69897	60	75	0.308224	0.000970733	0	0
Bucanetes_githagineus	Bucanetes githagineus	Trumpeter Finch	Fringillidae	0	0	0	1	32.6773	1.29226	100	0	0.33559	0.010495	1	2
Callacanthis_burtoni	Callacanthis burtoni	Spectacled Finch	Fringillidae	0	0	0	1	53.6654	1.47712	80	5	0.415262	0.0122378	0	1
Carduelis_ambigua	Carduelis ambigua	Black-headed Greenfinch	Fringillidae	0	0	NA	1	69.0558	1.18696	50	47	0.598017	0.00577583	1	1
Carduelis_atrata	Carduelis atrata	Black Siskin	Fringillidae	0	0	NA	1	55.8991	1.20548	60	5	0.521249	0.00472588	0	1
Carduelis_atriceps	Carduelis atriceps	Black-capped Siskin	Fringillidae	0	0	NA	1	56.6205	1.13033	50	67	0.377023	0.00231126	0	1
Carduelis_barbata	Carduelis barbata	Black-chinned Siskin	Fringillidae	0	0	NA	1	75.3496	1.19033	80	5	0.260955	0.00769576	0	1
Carduelis_cannabina	Carduelis cannabina	Eurasian Linnet	Fringillidae	0	0	1	1	47.8898	1.29115	60	9	0.200792	0.0143565	1	3
Carduelis_carduelis	Carduelis carduelis	European Goldfinch	Fringillidae	0	0	0	1	20.2504	1.20412	20	5	0.219528	0.0148758	1	3
Carduelis_chloris	Carduelis chloris	European Greenfinch	Fringillidae	0	0	1	1	36.8789	1.41497	40	14	0.189729	0.0129048	1	3
Carduelis_citrinella	Carduelis citrinella	Alpine Citril Finch	Fringillidae	0	0	0	1	37.295	1.07918	100	25.5	0.196253	0.0103975	0	2
Carduelis_corsicana	Carduelis corsicana	Mediterranean Citril Finch	Fringillidae	0	0	NA	1	53.6044	1.0607	100	39	0.384092	0.00822341	0	1
Carduelis_crassirostris	Carduelis crassirostris	Thick-billed Siskin	Fringillidae	0	0	NA	1	101.303	1.27875	0	6	0.531669	0.0052261	0	1
Carduelis_cucullata	Carduelis cucullata	Red Siskin	Fringillidae	0	0	NA	1	108.9	0.991226	0	26	0.438419	0.000921436	0	2
Carduelis_dominicensis	Carduelis dominicensis	Antillean Siskin	Fringillidae	0	0	NA	1	118.01	1.10037	50	24	0.239989	0.00195313	0	1
Carduelis_flammea	Carduelis flammea	Common Redpoll	Fringillidae	0	0	1	1	51.9599	1.08517	100	16	0.244676	0.0228064	1	3
Carduelis_flavirostris	Carduelis flavirostris	Twite	Fringillidae	0	0	0	1	42.07	1.18752	50	5	0.390592	0.015802	1	3
Carduelis_hornemanni	Carduelis hornemanni	Hoary Redpoll	Fringillidae	0	0	0	1	29.9649	1.13885	0	5	0.264404	0.0247182	1	NA
Carduelis_johannis	Carduelis johannis	Warsangli Linnet	Fringillidae	0	0	NA	1	35.3427	1.1271	50	0	0.46768	0.00318751	0	0
Plectrophenax_nivalis	Plectrophenax nivalis	Snow Bunting	Emberizidae	1	1	0	1	91.2597	1.62531	90	5	0.259655	0.0228589	2	3
Carduelis_magellanica	Carduelis magellanica	Hooded Siskin	Fringillidae	0	0	NA	1	120.33	1.13354	33	34	0.462805	0.00325005	0	2
Carduelis_monguilloti	Carduelis monguilloti	Vietnam Greenfinch	Fringillidae	0	0	NA	1	47.988	1.19033	0	45	0.622847	0.00175157	0	0
Carduelis_notata	Carduelis notata	Black-headed Siskin	Fringillidae	0	0	NA	1	45.6567	1.03743	0	43	0.586829	0.00252476	0	1
Carduelis_olivacea	Carduelis olivacea	Olivaceous Siskin	Fringillidae	0	0	NA	1	73.8655	1.18696	33	77	0.292109	0.00107955	0	1
Carduelis_pinus	Carduelis pinus	Pine Siskin	Fringillidae	0	0	0	1	43.4649	1.1038	50	41	0.246752	0.0154995	1	3
Carduelis_psaltria	Carduelis psaltria	Lesser Goldfinch	Fringillidae	0	0	0	1	88.0939	0.969612	20	9	0.408563	0.00903163	1	2
Carduelis_siemiradzkii	Carduelis siemiradzkii	Saffron Siskin	Fringillidae	0	0	NA	1	84.9223	1.18696	50	8	0.556317	0.0011735	0	1
Carduelis_sinica	Carduelis sinica	Grey-capped Greenfinch	Fringillidae	0	0	0	1	56.239	1.27138	33	14	0.462221	0.0131174	1	2
Carduelis_spinescens	Carduelis spinescens	Andean Siskin	Fringillidae	0	0	NA	1	83.499	1.05308	50	30	0.261189	0.000585824	0	1
Carduelis_spinoides	Carduelis spinoides	Yellow-breasted Greenfinch	Fringillidae	0	0	0	1	39.4867	1.26951	0	35	0.5817	0.0085326	1	1
Carduelis_spinus	Carduelis spinus	Eurasian Siskin	Fringillidae	0	0	0	1	104.346	1.12222	0	32	0.203017	0.0172963	1	3
Spizella_passerina	Spizella passerina	Chipping Sparrow	Emberizidae	1	1	1	1	19.4703	1.08636	80	28	0.259823	0.014725	1	3
Carduelis_uropygialis	Carduelis uropygialis	Yellow-rumped Siskin	Fringillidae	0	0	NA	1	24.9882	1.14613	50	5	0.389349	0.00778212	1	0
Carduelis_xanthogastra	Carduelis xanthogastra	Yellow-bellied Siskin	Fringillidae	0	0	NA	1	170.261	1.1038	0	25	0.296095	0.000691066	0	1
Carduelis_yarrellii	Carduelis yarrellii	Yellow-faced Siskin	Fringillidae	0	0	NA	1	65.902	1.18696	33	17	0.660839	0.0018128	0	1
Carduelis_yemenensis	Carduelis yemenensis	Yemen Linnet	Fringillidae	0	0	NA	1	25.4337	1.15534	70	0	0.387852	0.00596201	0	0
Carpodacus_cassinii	Carpodacus cassinii	Cassin's Finch	Fringillidae	0	0	0	1	79.9617	1.42325	60	9	0.238195	0.0137981	1	2
Carpodacus_edwardsii	Carpodacus edwardsii	Dark-rumped Rosefinch	Fringillidae	0	0	NA	1	51.8969	1.42325	100	14	0.570858	0.010864	0	1
Carpodacus_eos	Carpodacus eos	Pink-rumped Rosefinch	Fringillidae	0	0	NA	1	65.3286	1.43169	100	7	0.593449	0.0110388	1	0
Carpodacus_erythrinus	Carpodacus erythrinus	Common Rosefinch	Fringillidae	0	0	2	1	74.0895	1.38021	50	11	0.269327	0.0191643	2	3
Carpodacus_mexicanus	Carpodacus mexicanus	House Finch	Fringillidae	0	0	0	1	63.4343	1.33041	33	14	0.29739	0.0125343	0	3
Carpodacus_nipalensis	Carpodacus nipalensis	Dark-breasted Rosefinch	Fringillidae	0	0	NA	1	71.5788	1.3483	0	5	0.5786	0.0117536	0	1
Carpodacus_pulcherrimus	Carpodacus pulcherrimus	Beautiful Rosefinch	Fringillidae	0	0	0	1	41.2001	1.2833	50	5	0.556889	0.0127612	0	1
Carpodacus_puniceus	Carpodacus puniceus	Red-fronted Rosefinch	Fringillidae	0	0	0	1	54.2027	1.66978	100	5	0.472294	0.0138619	0	1
Carpodacus_purpureus	Carpodacus purpureus	Purple Finch	Fringillidae	0	0	0	1	82.4282	1.36736	33	60	0.201557	0.0166202	1	2
Carpodacus_rhodochlamys	Carpodacus rhodochlamys	Red-mantled Rosefinch	Fringillidae	0	0	0	1	61.3295	1.52504	50	5	0.369433	0.0154849	1	1
Carpodacus_roborowskii	Carpodacus roborowskii	Tibetan Rosefinch	Fringillidae	0	0	NA	1	103.86	1.43169	100	4	0.408153	0.0163258	0	0
Carpodacus_rodochroa	Carpodacus rodochroa	Pink-browed Rosefinch	Fringillidae	0	0	0	1	64.1845	1.25225	80	5	0.517242	0.0112394	0	0
Carpodacus_rodopeplus	Carpodacus rodopeplus	Spot-winged Rosefinch	Fringillidae	0	0	NA	1	69.155	1.36173	100	29	0.552658	0.00776552	0	0
Carpodacus_roseus	Carpodacus roseus	Pallas's Rosefinch	Fringillidae	0	0	0	1	60.6584	1.45637	33	39	0.403212	0.0273179	1	2
Carpodacus_rubescens	Carpodacus rubescens	Crimson Rosefinch	Fringillidae	0	0	0	1	57.6019	1.38021	100	22	0.567076	0.0102614	0	0
Carpodacus_rubicilla	Carpodacus rubicilla	Great Rosefinch	Fringillidae	0	0	0	1	85.4563	1.63548	50	5	0.429254	0.0143564	0	2
Carpodacus_rubicilloides	Carpodacus rubicilloides	Streaked Rosefinch	Fringillidae	0	0	0	1	56.6817	1.62377	100	5	0.555626	0.013184	1	1
Carpodacus_synoicus	Carpodacus synoicus	Pale Rosefinch	Fringillidae	0	0	0	1	68.0855	1.31806	100	5	0.284852	0.0168895	0	1
Carpodacus_thura	Carpodacus thura	White-browed Rosefinch	Fringillidae	0	0	0	1	60.3869	1.49693	100	5	0.534466	0.0129896	0	1
Carpodacus_trifasciatus	Carpodacus trifasciatus	Three-banded Rosefinch	Fringillidae	0	0	0	1	77.7183	1.41497	70	8	0.561438	0.0122142	1	1
Carpodacus_vinaceus	Carpodacus vinaceus	Vinaceous Rosefinch	Fringillidae	0	0	NA	1	60.1712	1.34537	50	18	0.538587	0.0110114	0	1
Coccothraustes_abeillei	Coccothraustes abeillei	Hooded Grosbeak	Fringillidae	0	0	0	1	115.404	1.68574	0	43	0.548022	0.00344551	0	0
Coccothraustes_coccothraustes	Coccothraustes coccothraustes	Hawfinch	Fringillidae	0	0	0	1	36.4377	1.7532	0	12	0.219307	0.0174056	1	3
Coccothraustes_vespertinus	Coccothraustes vespertinus	Evening Grosbeak	Fringillidae	0	0	1	1	149.537	1.76588	0	55	0.246729	0.0142878	1	3
Eophona_migratoria	Eophona migratoria	Yellow-billed Grosbeak	Fringillidae	0	0	0	1	68.7816	1.67117	33	18	0.480717	0.01682	2	1
Eophona_personata	Eophona personata	Japanese Grosbeak	Fringillidae	0	0	0	1	5.0338	1.90309	0	46	0.425958	0.0220045	1	1
Eremopsaltria_mongolicus	Eremopsaltria mongolicus	Mongolian Finch	Fringillidae	0	0	0	1	24.3216	1.33244	100	5	0.39889	0.015697	1	0
Fringilla_coelebs	Fringilla coelebs	Eurasian Chaffinch	Fringillidae	0	0	0	1	77.5818	1.34173	40	10	0.19764	0.0147989	1	3
Fringilla_montifringilla	Fringilla montifringilla	Brambling	Fringillidae	0	0	0	1	91.8754	1.36549	60	32	0.236975	0.0227082	1	3
Fringilla_teydea	Fringilla teydea	Blue Chaffinch	Fringillidae	0	0	0	0	70.9775	1.48144	80	2.5	0.418307	0.00328433	0	2
Haematospiza_sipahi	Haematospiza sipahi	Scarlet Finch	Fringillidae	0	0	0	1	83.7186	1.5966	50	12.5	0.531865	0.00959137	1	1
Leucosticte_arctoa	Leucosticte arctoa	Asian Rosy-finch	Fringillidae	0	0	0	1	47.53	1.48785	100	19	0.344245	0.0223214	1	2
Leucosticte_atrata	Leucosticte atrata	Black Rosy-finch	Fringillidae	0	0	0	1	48.0073	1.40226	100	5	0.233528	0.014259	1	1
Leucosticte_australis	Leucosticte australis	Brown-capped Rosy-finch	Fringillidae	0	0	0	1	28.7837	1.42488	100	31.5	0.246013	0.0131186	0	1
Leucosticte_brandti	Leucosticte brandti	Black-headed Mountain-finch	Fringillidae	0	0	0	1	34.5707	1.48287	100	5	0.463923	0.0142509	1	1
Leucosticte_nemoricola	Leucosticte nemoricola	Plain Mountain-finch	Fringillidae	0	0	0	1	21.4307	1.35603	100	5	0.446224	0.0139364	1	1
Leucosticte_sillemi	Leucosticte sillemi	Sillem's Mountain-finch	Fringillidae	0	0	NA	1	8.55466	1.4609	100	2	0.297163	0.0147137	0	1
Leucosticte_tephrocotis	Leucosticte tephrocotis	Gray-crowned Rosy-finch	Fringillidae	0	0	0	1	40.8926	1.59623	100	10	0.271102	0.0149644	1	2
Linurgus_olivaceus	Linurgus olivaceus	Oriole Finch	Fringillidae	0	0	0	1	102.509	1.3075	0	31	0.469594	0.00172347	0	1
Loxia_curvirostra	Loxia curvirostra	Red Crossbill	Fringillidae	0	0	0	1	71.745	1.59013	0	28	0.247039	0.0169085	1	3
Loxia_leucoptera	Loxia leucoptera	White-winged Crossbill	Fringillidae	0	0	1	1	71.5321	1.40928	0	42	0.24309	0.0212386	1	3
Loxia_megaplaga	Loxia megaplaga	Hispaniolan Crossbill	Fringillidae	0	0	NA	1	72.3641	1.45939	0	71	0.266501	0.00191928	0	1
Loxia_pytyopsittacus	Loxia pytyopsittacus	Parrot Crossbill	Fringillidae	0	0	0	1	71.1295	1.72428	0	50	0.171449	0.0158247	0	3
Loxia_scotica	Loxia scotica	Scottish Crossbill	Fringillidae	0	0	1	1	82.0408	1.63548	0	22	0.173577	0.00638987	0	2
Mycerobas_affinis	Mycerobas affinis	Collared Grosbeak	Fringillidae	0	0	NA	1	72.9281	1.88508	33	8	0.557262	0.0111179	0	1
Mycerobas_carnipes	Mycerobas carnipes	White-winged Grosbeak	Fringillidae	0	0	0	1	88.5314	1.77085	0	5	0.502475	0.014059	0	1
Mycerobas_icterioides	Mycerobas icterioides	Black-and-yellow Grosbeak	Fringillidae	0	0	0	1	160.504	1.82607	50	3	0.287308	0.0137302	0	1
Mycerobas_melanozanthos	Mycerobas melanozanthos	Spot-winged Grosbeak	Fringillidae	0	0	0	1	117.976	1.79239	20	28	0.541605	0.00928098	0	1
Neospiza_concolor	Neospiza concolor	Sao Tome Grosbeak	Fringillidae	0	0	NA	1	25.7449	1.59329	50	0	0.529657	0.00169796	0	1
Pinicola_enucleator	Pinicola enucleator	Pine Grosbeak	Fringillidae	0	0	0	1	86.1568	1.75128	0	27	0.235602	0.0213454	1	3
Pinicola_subhimachala	Pinicola subhimachala	Crimson-browed Finch	Fringillidae	0	0	NA	1	72.8139	1.66441	50	16	0.567039	0.0104656	1	0
Pyrrhoplectes_epauletta	Pyrrhoplectes epauletta	Gold-naped Finch	Fringillidae	0	0	NA	1	115.641	1.27875	50	15	0.523079	0.00963462	0	1
Pyrrhula_aurantiaca	Pyrrhula aurantiaca	Orange Bullfinch	Fringillidae	0	0	0	1	44.624	1.29003	33	4	0.297869	0.0133465	1	1
Pyrrhula_erythaca	Pyrrhula erythaca	Grey-headed Bullfinch	Fringillidae	0	0	0	1	49.0243	1.27875	50	14	0.535981	0.0121077	0	2
Pyrrhula_erythrocephala	Pyrrhula erythrocephala	Red-headed Bullfinch	Fringillidae	0	0	0	1	69.4878	1.35793	50	5	0.472207	0.0125513	0	1
Pyrrhula_leucogenis	Pyrrhula leucogenis	White-cheeked Bullfinch	Fringillidae	0	0	NA	1	16.6089	1.27875	30	37	0.262203	0.000984759	0	0
Pyrrhula_murina	Pyrrhula murina	Azores Bullfinch	Fringillidae	0	0	NA	1	13.0435	1.47712	0	0	0.272312	NA	0	2
Pyrrhula_nipalensis	Pyrrhula nipalensis	Brown Bullfinch	Fringillidae	0	0	0	1	25.3867	1.39094	0	23	0.478761	0.00859682	0	1
Pyrrhula_pyrrhula	Pyrrhula pyrrhula	Eurasian Bullfinch	Fringillidae	0	0	0	1	40.6811	1.38739	0	29	0.209094	0.0195398	1	3
Rhodopechys_obsoletus	Rhodopechys obsoletus	Desert Finch	Fringillidae	0	0	0	1	39.0846	1.40654	100	5	0.468184	0.0167098	1	0
Rhodopechys_sanguineus	Rhodopechys sanguineus	Crimson-winged Finch	Fringillidae	0	0	0	1	30.7738	1.58149	50	5	0.435591	0.0140645	1	1
Rhynchostruthus_louisae	Rhynchostruthus louisae	Somali Grosbeak	Fringillidae	0	0	NA	1	14.3726	1.38917	33	0	0.409479	0.00377202	0	0
Rhynchostruthus_percivali	Rhynchostruthus percivali	Arabian Grosbeak	Fringillidae	0	0	0	1	5.70136	1.49831	33	2	0.379961	0.00430234	0	0
Rhynchostruthus_socotranus	Rhynchostruthus socotranus	Socotra Grosbeak	Fringillidae	0	0	0	1	48.0515	1.43973	33	0	0.395333	0.00464027	0	1
Serinus_alario	Serinus alario	Black-headed Canary	Fringillidae	0	0	0	1	149.153	1.08636	60	5	0.560362	0.00782204	0	2
Serinus_albogularis	Serinus albogularis	White-throated Canary	Fringillidae	0	0	0	1	38.8785	1.43297	33	5	0.360752	0.00560809	0	1
Serinus_ankoberensis	Serinus ankoberensis	Ankober Serin	Fringillidae	0	0	0	1	34.6418	1.17319	100	5	0.564076	0.00300954	0	1
Serinus_atrogularis	Serinus atrogularis	Black-throated Seedeater	Fringillidae	0	0	0	1	19.9693	1.0569	50	18	0.622331	0.00221163	0	2
Serinus_buchanani	Serinus buchanani	Kenya Grosbeak-canary	Fringillidae	0	0	NA	1	38.3025	1.18667	33	20	0.469883	0.00201164	0	0
Serinus_burtoni	Serinus burtoni	Thick-billed Seedeater	Fringillidae	0	0	0	1	19.6204	1.4843	33	30	0.492081	0.00163858	0	1
Serinus_canaria	Serinus canaria	Island Canary	Fringillidae	0	0	0	1	56.6239	1.38561	80	0	0.418307	0.00390116	0	3
Serinus_canicollis	Serinus canicollis	Cape Canary	Fringillidae	0	0	0	1	63.4728	1.18184	50	24	0.4736	0.00223852	0	2
Serinus_capistratus	Serinus capistratus	Black-faced Canary	Fringillidae	0	0	NA	1	64.1352	1.18667	50	53	0.531036	0.0010373	0	0
Serinus_citrinelloides	Serinus citrinelloides	Abyssinian Citril	Fringillidae	0	0	0	1	51.8879	1.11909	50	25	0.53099	0.00179265	0	1
Serinus_citrinipectus	Serinus citrinipectus	Lemon-breasted Seedeater	Fringillidae	0	0	0	1	62.5051	1.04922	100	33	0.507617	0.0040081	0	2
Serinus_donaldsoni	Serinus donaldsoni	Ethiopian Grosbeak-canary	Fringillidae	0	0	0	1	96.3049	1.38021	50	5	0.54841	0.00179889	0	1
Serinus_dorsostriatus	Serinus dorsostriatus	White-bellied Canary	Fringillidae	0	0	0	1	39.1605	1.18041	60	6	0.532852	0.0016745	0	1
Serinus_estherae	Serinus estherae	Mountain Serin	Fringillidae	0	0	NA	1	60.0966	1.18667	100	23.5	0.199846	0.000602032	0	1
Serinus_flavigula	Serinus flavigula	Yellow-throated Seedeater	Fringillidae	0	0	0	1	18.8575	1.07188	80	5	0.490188	0.00121721	0	1
Serinus_flaviventris	Serinus flaviventris	Yellow Canary	Fringillidae	0	0	0	1	84.7452	1.20952	80	5	0.574151	0.00709367	0	2
Serinus_flavivertex	Serinus flavivertex	Yellow-crowned Canary	Fringillidae	0	0	0	1	49.7913	1.14613	50	21	0.640501	0.00191361	0	1
Serinus_gularis	Serinus gularis	Streaky-headed Seedeater	Fringillidae	0	0	0	1	17.3021	1.20412	33	32	0.686866	0.00238365	0	2
Serinus_koliensis	Serinus koliensis	Papyrus Canary	Fringillidae	0	0	0	1	30.3019	1.13354	0	19	0.402542	0.0017203	0	1
Serinus_leucopterus	Serinus leucopterus	Protea Canary	Fringillidae	0	0	0	1	21.0208	1.34439	50	14	0.258202	0.00638272	0	1
Serinus_leucopygius	Serinus leucopygius	White-rumped Seedeater	Fringillidae	0	0	0	1	17.2769	1.03342	80	12	0.880848	0.00298236	0	1
Serinus_melanochrous	Serinus melanochrous	Kipengere Seedeater	Fringillidae	0	0	NA	1	26.7215	1.18667	33	47	0.71506	0.00245572	0	0
Serinus_menachensis	Serinus menachensis	Yemen Serin	Fringillidae	0	0	0	1	14.3403	1.18667	50	0	0.392562	0.0065841	0	1
Serinus_mennelli	Serinus mennelli	Black-eared Seedeater	Fringillidae	0	0	0	1	22.4439	1.18752	20	40	0.873892	0.00305533	0	1
Serinus_mozambicus	Serinus mozambicus	Yellow-fronted Canary	Fringillidae	0	0	0	1	49.6896	1.07737	50	23	0.73051	0.00248325	0	2
Serinus_nigriceps	Serinus nigriceps	Ethiopian Siskin	Fringillidae	0	0	0	1	73.0071	1.17609	100	5	0.558788	0.00250836	0	0
Serinus_pusillus	Serinus pusillus	Fire-fronted Serin	Fringillidae	0	0	0	1	11.3368	1.06446	100	5	0.350365	0.0139364	1	2
Serinus_reichardi	Serinus reichardi	Reichard's Seedeater	Fringillidae	0	0	0	1	16.8718	1.18893	30	40	0.953944	0.00259309	0	1
Serinus_rothschildi	Serinus rothschildi	Olive-rumped Serin	Fringillidae	0	0	NA	1	17.0431	1.14613	50	0	0.382889	0.00669642	0	0
Serinus_rufobrunneus	Serinus rufobrunneus	Principe Seedeater	Fringillidae	0	0	0	1	34.8095	1.4133	0	0	0.388847	0.000992417	0	1
Serinus_scotops	Serinus scotops	Forest Canary	Fringillidae	0	0	0	1	57.1268	1.15229	50	17.5	0.371539	0.00551905	0	1
Serinus_serinus	Serinus serinus	European Serin	Fringillidae	0	0	0	1	61.5347	1.04922	60	9	0.224393	0.0108186	1	3
Serinus_striolatus	Serinus striolatus	Streaky Seedeater	Fringillidae	0	0	0	1	23.0379	1.35025	50	27	0.551508	0.00205341	0	1
Serinus_sulphuratus	Serinus sulphuratus	Brimstone Canary	Fringillidae	0	0	0	1	33.3558	1.4456	33	30	0.814188	0.00304103	0	2
Serinus_symonsi	Serinus symonsi	Drakensberg Siskin	Fringillidae	0	0	0	1	57.7551	1.19866	100	8	0.463068	0.00699801	0	0
Serinus_syriacus	Serinus syriacus	Syrian Serin	Fringillidae	0	0	0	1	36.385	1.06819	33	5	0.794331	0.0101135	1	2
Serinus_thibetanus	Serinus thibetanus	Tibetan Serin	Fringillidae	0	0	0	1	35.1754	1.02119	20	5	0.545395	0.0116621	1	1
Serinus_totta	Serinus totta	Cape Siskin	Fringillidae	0	0	0	1	46.585	1.1271	50	11.5	0.225697	0.00613105	0	1
Serinus_tristriatus	Serinus tristriatus	Brown-rumped Seedeater	Fringillidae	0	0	0	1	19.4119	1.19033	50	5	0.563302	0.00263575	0	1
Serinus_xantholaemus	Serinus xantholaemus	Salvadori's Serin	Fringillidae	0	0	NA	1	16.7417	1.0607	100	5	0.516022	0.00109972	0	0
Serinus_xanthopygius	Serinus xanthopygius	Yellow-rumped Seedeater	Fringillidae	0	0	NA	1	21.7016	1.18667	50	10	0.720053	0.00253086	0	0
Uragus_sibiricus	Uragus sibiricus	Long-tailed Rosefinch	Fringillidae	0	0	0	1	58.9163	1.2418	40	25	0.483491	0.0217315	1	2
Acrobatornis_fonsecai	Acrobatornis fonsecai	Pink-legged Graveteiro	Furnariidae	0	0	0	1	9.16004	1.13672	0	41	0.256755	0.0023207	0	1
Anabacerthia_amaurotis	Anabacerthia amaurotis	White-browed Foliage-gleaner	Furnariidae	0	0	NA	1	14.3897	1.2833	20	47	0.225959	0.00452982	0	1
Anabacerthia_striaticollis	Anabacerthia striaticollis	Montane Foliage-gleaner	Furnariidae	0	0	0	1	19.6963	1.39445	0	35	0.297586	0.000817178	0	0
Anabacerthia_variegaticeps	Anabacerthia variegaticeps	Scaly-throated Foliage-gleaner	Furnariidae	0	0	0	1	19.5164	1.44404	0	41	0.320155	0.00124086	0	0
Anabazenops_dorsalis	Anabazenops dorsalis	Dusky-cheeked Foliage-gleaner	Furnariidae	0	0	0	1	11.6976	1.549	0	77	0.314802	0.000883707	0	1
Anabazenops_fuscus	Anabazenops fuscus	White-collared Foliage-gleaner	Furnariidae	0	0	0	1	7.49606	1.59106	10	38	0.494495	0.00289399	0	1
Ancistrops_strigilatus	Ancistrops strigilatus	Chestnut-winged Hookbill	Furnariidae	0	0	NA	1	11.3853	1.55509	50	79	0.258337	0.000678388	0	0
Anumbius_annumbi	Anumbius annumbi	Firewood-gatherer	Furnariidae	0	0	0	1	14.0016	1.61805	50	32	0.304625	0.00641523	0	2
Aphrastura_masafuerae	Aphrastura masafuerae	Masafuera Rayadito	Furnariidae	0	0	0	1	13.4546	1.08636	20	0	0.599997	0.00777281	0	1
Aphrastura_spinicauda	Aphrastura spinicauda	Thorn-tailed Rayadito	Furnariidae	0	0	0	1	13.1428	1.0607	10	31	0.226954	0.00558	0	2
Asthenes_anthoides	Asthenes anthoides	Austral Canastero	Furnariidae	0	0	0	1	14.3969	1.3483	50	6	0.211252	0.00677095	0	1
Asthenes_arequipae	Asthenes arequipae	Dark-winged Canastero	Furnariidae	0	0	NA	NA	NA	1.30103	80	NA	NA	NA	NA	NA
Asthenes_baeri	Asthenes baeri	Short-billed Canastero	Furnariidae	0	0	0	1	17.0568	1.25042	30	24	0.407668	0.00762835	0	1
Asthenes_berlepschi	Asthenes berlepschi	Berlepsch's Canastero	Furnariidae	0	0	NA	1	13.0914	1.27875	70	75	0.308079	0.002067	0	0
Asthenes_cactorum	Asthenes cactorum	Cactus Canastero	Furnariidae	0	0	0	1	12.9096	1.24304	70	5	0.537847	0.00184729	0	0
Asthenes_dorbignyi	Asthenes dorbignyi	Creamy-breasted Canastero	Furnariidae	0	0	0	1	30.8202	1.2014	70	7	0.534656	0.00310374	0	1
Asthenes_flammulata	Asthenes flammulata	Many-striped Canastero	Furnariidae	0	0	NA	1	28.5068	1.35218	50	26	0.250614	0.000693722	0	0
Asthenes_heterura	Asthenes heterura	Maquis Canastero	Furnariidae	0	0	NA	1	27.1614	1.13033	70	50	0.521249	0.00342131	0	0
Asthenes_huancavelicae	Asthenes huancavelicae	Pale-tailed Canastero	Furnariidae	0	0	NA	NA	NA	1.27875	70	NA	NA	NA	NA	NA
Asthenes_hudsoni	Asthenes hudsoni	Hudson's Canastero	Furnariidae	0	0	0	1	16.0716	1.27875	50	14	0.261523	0.0078163	0	0
Asthenes_humicola	Asthenes humicola	Dusky-tailed Canastero	Furnariidae	0	0	0	1	18.5303	1.34811	60	5	0.336576	0.00590873	0	1
Asthenes_humilis	Asthenes humilis	Streak-throated Canastero	Furnariidae	0	0	0	1	24.3283	1.32222	100	23.5	0.382681	0.00179882	0	0
Asthenes_luizae	Asthenes luizae	Cipo Canastero	Furnariidae	0	0	NA	1	16.8432	1.44716	100	30	0.647904	0.00264578	0	1
Asthenes_maculicauda	Asthenes maculicauda	Scribble-tailed Canastero	Furnariidae	0	0	NA	1	28.3174	1.27875	50	57.5	0.41258	0.00239304	0	0
Asthenes_modesta	Asthenes modesta	Cordilleran Canastero	Furnariidae	0	0	0	1	15.6686	1.22531	80	5	0.35103	0.00673632	0	1
Asthenes_ottonis	Asthenes ottonis	Rusty-fronted Canastero	Furnariidae	0	0	NA	1	22.8212	1.11394	50	56	0.408111	0.00159313	0	0
Asthenes_patagonica	Asthenes patagonica	Patagonian Canastero	Furnariidae	0	0	0	1	10.9605	1.21484	50	6	0.285882	0.00924546	0	0
Asthenes_pudibunda	Asthenes pudibunda	Canyon Canastero	Furnariidae	0	0	NA	1	25.4363	1.17609	50	7	0.457024	0.00161088	0	1
Asthenes_pyrrholeuca	Asthenes pyrrholeuca	Lesser Canastero	Furnariidae	0	0	0	1	25.9536	1.12057	100	5	0.281589	0.00882827	1	1
Asthenes_sclateri	Asthenes sclateri	Puno Canastero	Furnariidae	0	0	0	1	21.0555	1.4133	100	21	0.573692	0.00575764	0	1
Asthenes_steinbachi	Asthenes steinbachi	Steinbach's Canastero	Furnariidae	0	0	0	1	27.778	1.29003	50	5	0.488803	0.00695637	0	0
Asthenes_urubambensis	Asthenes urubambensis	Line-fronted Canastero	Furnariidae	0	0	NA	1	16.7363	1.20412	50	71	0.322503	0.00150171	0	1
Asthenes_virgata	Asthenes virgata	Junin Canastero	Furnariidae	0	0	NA	1	9.63396	1.34242	50	66	0.374194	0.00139853	0	0
Asthenes_wyatti	Asthenes wyatti	Streak-backed Canastero	Furnariidae	0	0	0	1	20.7321	1.18184	100	67	0.345371	0.00137555	0	1
Automolus_infuscatus	Automolus infuscatus	Olive-backed Foliage-gleaner	Furnariidae	0	0	0	1	16.2507	1.5172	0	78	0.290001	0.000772956	0	1
Automolus_leucophthalmus	Automolus leucophthalmus	White-eyed Foliage-gleaner	Furnariidae	0	0	0	1	20.155	1.53782	0	30	0.434806	0.00265348	0	1
Automolus_melanopezus	Automolus melanopezus	Brown-rumped Foliage-gleaner	Furnariidae	0	0	NA	1	20.0735	1.49693	0	79	0.368541	0.000748098	0	0
Automolus_ochrolaemus	Automolus ochrolaemus	Buff-throated Foliage-gleaner	Furnariidae	0	0	0	1	20.1499	1.60423	10	78	0.314011	0.000838294	0	1
Automolus_rubiginosus	Automolus rubiginosus	Ruddy Foliage-gleaner	Furnariidae	0	0	0	1	11.7459	1.59988	0	71	0.310085	0.00093652	0	1
Automolus_rufipileatus	Automolus rufipileatus	Chestnut-crowned Foliage-gleaner	Furnariidae	0	0	NA	1	15.2163	1.54158	0	77	0.290001	0.000841481	0	0
Berlepschia_rikeri	Berlepschia rikeri	Point-tailed Palmcreeper	Furnariidae	0	0	0	1	22.6399	1.5682	0	78	0.323761	0.000852075	0	1
Certhiaxis_cinnamomeus	Certhiaxis cinnamomeus	Yellow-chinned Spinetail	Furnariidae	0	0	0	1	17.8048	1.18184	0	45	0.440489	0.00158034	0	0
Certhiaxis_mustelinus	Certhiaxis mustelinus	Red-and-white Spinetail	Furnariidae	0	0	0	1	8.27485	1.17609	0	77	0.274478	0.000636682	0	0
Cichlocolaptes_leucophrus	Cichlocolaptes leucophrus	Pale-browed Treehunter	Furnariidae	0	0	NA	1	22.5956	1.69897	0	43	0.287108	0.00323138	0	0
Cinclodes_albidiventris	Cinclodes albidiventris	Chestnut-winged Cinclodes	Furnariidae	0	0	NA	NA	NA	1.47712	100	NA	NA	NA	NA	0
Cinclodes_albiventris	Cinclodes albiventris	Cream-winged Cinclodes	Furnariidae	0	0	NA	NA	NA	1.47712	100	NA	NA	NA	NA	0
Cinclodes_antarcticus	Cinclodes antarcticus	Blackish Cinclodes	Furnariidae	0	0	0	1	8.52781	1.80072	100	22	0.133877	0.00452328	0	1
Cinclodes_aricomae	Cinclodes aricomae	Royal Cinclodes	Furnariidae	0	0	NA	1	13.4548	1.69897	100	69	0.369535	0.00179787	0	1
Cinclodes_atacamensis	Cinclodes atacamensis	White-winged Cinclodes	Furnariidae	0	0	0	1	11.0636	1.72428	100	6	0.412085	0.00395206	0	1
Cinclodes_comechingonus	Cinclodes comechingonus	Cordoba Cinclodes	Furnariidae	0	0	0	1	13.8158	1.45484	100	33	0.573164	0.00810859	0	0
Cinclodes_excelsior	Cinclodes excelsior	Stout-billed Cinclodes	Furnariidae	0	0	0	1	11.7296	1.80618	70	14	0.205494	0.000644889	0	1
Cinclodes_fuscus	Cinclodes fuscus	Buff-winged Cinclodes	Furnariidae	0	0	0	1	9.90155	1.47712	100	7	0.320301	0.00578826	1	1
Cinclodes_nigrofumosus	Cinclodes nigrofumosus	Seaside Cinclodes	Furnariidae	0	0	0	1	17.8521	1.81291	100	4	0.336576	0.00465141	0	1
Cinclodes_olrogi	Cinclodes olrogi	Olrog's Cinclodes	Furnariidae	0	0	0	1	11.1358	1.44716	100	38.5	0.586661	0.00816665	0	1
Cinclodes_oustaleti	Cinclodes oustaleti	Grey-flanked Cinclodes	Furnariidae	0	0	0	1	14.7898	1.4843	100	7	0.272242	0.0061155	0	1
Cinclodes_pabsti	Cinclodes pabsti	Long-tailed Cinclodes	Furnariidae	0	0	0	1	14.3325	1.72428	100	69	0.167977	0.00518028	0	1
Cinclodes_palliatus	Cinclodes palliatus	White-bellied Cinclodes	Furnariidae	0	0	0	1	3.57666	2.01703	70	21	0.452092	0.00140874	0	0
Cinclodes_patagonicus	Cinclodes patagonicus	Dark-bellied Cinclodes	Furnariidae	0	0	0	1	31.749	1.48714	100	26	0.262666	0.00590873	0	1
Cinclodes_taczanowskii	Cinclodes taczanowskii	Surf Cinclodes	Furnariidae	0	0	0	1	12.2802	1.80956	100	2.5	0.437596	0.00174385	0	1
Clibanornis_dendrocolaptoides	Clibanornis dendrocolaptoides	Canebrake Groundcreeper	Furnariidae	0	0	NA	1	13.92	1.68305	60	45	0.209676	0.00463652	0	1
Coryphistera_alaudina	Coryphistera alaudina	Lark-like Brushrunner	Furnariidae	0	0	0	1	21.8087	1.47712	100	33	0.393856	0.00717703	0	1
Cranioleuca_albicapilla	Cranioleuca albicapilla	Creamy-crested Spinetail	Furnariidae	0	0	NA	1	7.29679	1.33143	0	43	0.424668	0.00139056	0	0
Cranioleuca_albiceps	Cranioleuca albiceps	Light-crowned Spinetail	Furnariidae	0	0	0	1	15.4284	1.2492	0	70	0.323622	0.00226794	0	1
Cranioleuca_antisiensis	Cranioleuca antisiensis	Line-cheeked Spinetail	Furnariidae	0	0	0	1	16.9844	1.22917	0	10	0.369209	0.00072577	0	0
Cranioleuca_baroni	Cranioleuca baroni	Baron's Spinetail	Furnariidae	0	0	NA	1	21.8582	1.33746	0	34	0.311301	0.000895618	0	0
Cranioleuca_curtata	Cranioleuca curtata	Ash-browed Spinetail	Furnariidae	0	0	NA	1	9.50738	1.24304	0	72	0.26361	0.000864271	0	1
Cranioleuca_demissa	Cranioleuca demissa	Tepui Spinetail	Furnariidae	0	0	NA	1	13.1782	1.18184	0	79	0.3148	0.000667238	0	0
Cranioleuca_dissita	Cranioleuca dissita	Coiba Spinetail	Furnariidae	0	0	NA	NA	NA	1.21854	0	NA	NA	NA	NA	NA
Cranioleuca_erythrops	Cranioleuca erythrops	Red-faced Spinetail	Furnariidae	0	0	0	1	7.40442	1.22789	0	22	0.229468	0.000604495	0	1
Cranioleuca_gutturata	Cranioleuca gutturata	Speckled Spinetail	Furnariidae	0	0	0	1	19.6548	1.17319	0	78	0.286138	0.000745641	0	0
Cranioleuca_hellmayri	Cranioleuca hellmayri	Streak-capped Spinetail	Furnariidae	0	0	0	1	14.5658	1.17609	0	26	0.350585	0.000960925	0	0
Cranioleuca_henricae	Cranioleuca henricae	Bolivian Spinetail	Furnariidae	0	0	NA	1	12.8944	1.21854	0	66	0.3276	0.00281357	0	1
Cranioleuca_marcapatae	Cranioleuca marcapatae	Marcapata Spinetail	Furnariidae	0	0	0	1	11.2714	1.29667	0	78	0.383583	0.00142836	0	1
Cranioleuca_muelleri	Cranioleuca muelleri	Scaled Spinetail	Furnariidae	0	0	NA	1	31.7924	1.16137	0	42	0.380634	0.00123229	0	1
Cranioleuca_obsoleta	Cranioleuca obsoleta	Olive Spinetail	Furnariidae	0	0	0	1	17.9364	1.1271	0	42	0.185743	0.00531482	0	1
Cranioleuca_pallida	Cranioleuca pallida	Pallid Spinetail	Furnariidae	0	0	0	1	11.7254	1.0607	0	31	0.588938	0.00268597	0	0
Cranioleuca_pyrrhophia	Cranioleuca pyrrhophia	Stripe-crowned Spinetail	Furnariidae	0	0	0	1	22.3447	1.17319	0	35	0.394121	0.00697253	0	1
Cranioleuca_semicinerea	Cranioleuca semicinerea	Grey-headed Spinetail	Furnariidae	0	0	NA	1	6.19666	1.17609	0	28	0.767686	0.00163204	0	1
Cranioleuca_subcristata	Cranioleuca subcristata	Crested Spinetail	Furnariidae	0	0	NA	1	10.366	1.16732	0	20	0.342896	0.000779772	0	0
Cranioleuca_sulphurifera	Cranioleuca sulphurifera	Sulphur-throated Spinetail	Furnariidae	0	0	0	1	19.7421	1.13033	0	16	0.2515	0.00757347	0	0
Cranioleuca_vulpecula	Cranioleuca vulpecula	Parker's Spinetail	Furnariidae	0	0	NA	1	10.0637	1.27875	0	78	0.239424	0.000593123	0	1
Cranioleuca_vulpina	Cranioleuca vulpina	Rusty-backed Spinetail	Furnariidae	0	0	0	1	11.3546	1.1959	0	56	0.550581	0.00116136	0	1
Dendrocincla_turdina	Dendrocincla turdina	Plain-winged Woodcreeper	Furnariidae	0	0	2	0	26.1685	1.59106	0	34	0.322782	0.00318883	0	NA
Furnarius_cinnamomeus	Furnarius cinnamomeus	Pacific Hornero	Furnariidae	0	0	NA	NA	NA	1.615	100	NA	NA	NA	NA	NA
Furnarius_cristatus	Furnarius cristatus	Crested Hornero	Furnariidae	0	0	0	1	7.95131	1.40654	100	42	0.50125	0.00679005	0	1
Furnarius_figulus	Furnarius figulus	Wing-banded Hornero	Furnariidae	0	0	0	1	11.4822	1.44716	100	32	0.599036	0.00159139	0	1
Furnarius_leucopus	Furnarius leucopus	Pale-legged Hornero	Furnariidae	0	0	NA	1	9.32929	1.73878	100	61	0.431274	0.0010349	0	1
Furnarius_longirostris	Furnarius longirostris	Caribbean Hornero	Furnariidae	0	0	NA	NA	NA	1.6902	100	NA	NA	NA	NA	NA
Furnarius_minor	Furnarius minor	Lesser Hornero	Furnariidae	0	0	NA	1	13.0955	1.41497	70	78	0.244544	0.000633559	0	0
Furnarius_rufus	Furnarius rufus	Rufous Hornero	Furnariidae	0	0	0	1	16.6103	1.67907	70	34	0.461032	0.00330479	0	2
Furnarius_torridus	Furnarius torridus	Pale-billed Hornero	Furnariidae	0	0	NA	1	20.7859	1.72016	100	80	0.132403	0.000610136	0	1
Geositta_antarctica	Geositta antarctica	Short-billed Miner	Furnariidae	0	0	0	1	12.6648	1.5682	100	10	0.156764	0.00539334	1	1
Geositta_crassirostris	Geositta crassirostris	Thick-billed Miner	Furnariidae	0	0	NA	1	12.8135	1.74663	100	5	0.527415	0.00186282	0	0
Geositta_cunicularia	Geositta cunicularia	Common Miner	Furnariidae	0	0	0	1	21.9848	1.45484	100	9	0.300353	0.00741796	0	1
Geositta_isabellina	Geositta isabellina	Creamy-rumped Miner	Furnariidae	0	0	0	1	6.32769	1.63347	100	5	0.383526	0.00893652	0	1
Geositta_maritima	Geositta maritima	Greyish Miner	Furnariidae	0	0	0	1	5.60864	1.21748	100	1	0.328998	0.00249494	0	0
Geositta_peruviana	Geositta peruviana	Coastal Miner	Furnariidae	0	0	0	1	8.48335	1.31806	100	5	0.413843	0.0012445	0	1
Geositta_poeciloptera	Geositta poeciloptera	Campo Miner	Furnariidae	0	0	NA	1	11.827	1.25527	100	27	0.602731	0.00216898	0	0
Geositta_punensis	Geositta punensis	Puna Miner	Furnariidae	0	0	0	1	5.7837	1.41162	100	5	0.558223	0.00519118	0	1
Geositta_rufipennis	Geositta rufipennis	Rufous-banded Miner	Furnariidae	0	0	0	1	6.87728	1.53504	100	9	0.380345	0.00650049	0	1
Geositta_saxicolina	Geositta saxicolina	Dark-winged Miner	Furnariidae	0	0	NA	1	12.8409	1.51851	100	24	0.393334	0.00135684	0	0
Geositta_tenuirostris	Geositta tenuirostris	Slender-billed Miner	Furnariidae	0	0	0	1	11.6213	1.52396	100	15	0.476786	0.00228305	0	1
Gyalophylax_hellmayri	Gyalophylax hellmayri	Red-shouldered Spinetail	Furnariidae	0	0	0	1	7.85169	1.40654	50	21	0.691388	0.00202974	0	1
Heliobletus_contaminatus	Heliobletus contaminatus	Sharp-billed Treehunter	Furnariidae	0	0	NA	1	17.4092	1.14613	0	39	0.290231	0.00390248	0	1
Hellmayrea_gularis	Hellmayrea gularis	White-browed Spinetail	Furnariidae	0	0	NA	1	11.1478	1.09342	30	23	0.269938	0.000691708	0	1
Hylocryptus_erythrocephalus	Hylocryptus erythrocephalus	Henna-hooded Foliage-gleaner	Furnariidae	0	0	0	1	15.7239	1.66745	70	8	0.552387	0.00103625	0	1
Hylocryptus_rectirostris	Hylocryptus rectirostris	Chestnut-capped Foliage-gleaner	Furnariidae	0	0	0	1	12.9219	1.68124	100	27	0.602196	0.0024039	0	1
Hyloctistes_subulatus	Hyloctistes subulatus	Striped Woodhaunter	Furnariidae	0	0	0	1	14.4623	1.45939	0	78	0.267532	0.000695607	0	1
Hyloctistes_virgatus	Hyloctistes virgatus	Western Woodhaunter	Furnariidae	0	0	NA	NA	NA	1.46982	0	NA	NA	NA	NA	NA
Leptasthenura_aegithaloides	Leptasthenura aegithaloides	Plain-mantled Tit-spinetail	Furnariidae	0	0	0	1	16.7066	0.977417	0	6	0.328294	0.00767464	1	1
Leptasthenura_andicola	Leptasthenura andicola	Andean Tit-spinetail	Furnariidae	0	0	0	1	22.0984	1.19033	20	13	0.3356	0.000791713	0	1
Leptasthenura_fuliginiceps	Leptasthenura fuliginiceps	Brown-capped Tit-spinetail	Furnariidae	0	0	0	1	10.9477	1.10037	0	8	0.528026	0.00623802	0	0
Leptasthenura_pileata	Leptasthenura pileata	Rusty-crowned Tit-spinetail	Furnariidae	0	0	NA	1	38.6395	1.01284	0	12	0.382732	0.00109478	0	1
Leptasthenura_platensis	Leptasthenura platensis	Tufted Tit-spinetail	Furnariidae	0	0	0	1	5.51301	1.02531	0	19	0.353488	0.00771245	0	1
Leptasthenura_setaria	Leptasthenura setaria	Araucaria Tit-spinetail	Furnariidae	0	0	0	1	32.0523	1.04139	0	43	0.246466	0.00428285	0	1
Leptasthenura_striata	Leptasthenura striata	Streaked Tit-spinetail	Furnariidae	0	0	NA	1	29.2174	0.954243	0	7	0.466296	0.00165692	0	0
Leptasthenura_striolata	Leptasthenura striolata	Striolated Tit-spinetail	Furnariidae	0	0	NA	1	14.9239	1.02119	0	65	0.182268	0.00485378	0	1
Leptasthenura_xenothorax	Leptasthenura xenothorax	White-browed Tit-spinetail	Furnariidae	0	0	NA	1	23.9963	1.02119	0	61	0.40985	0.00139548	0	1
Leptasthenura_yanacensis	Leptasthenura yanacensis	Tawny Tit-spinetail	Furnariidae	0	0	0	1	14.3433	0.944483	0	44	0.366123	0.00228928	0	1
Limnoctites_rectirostris	Limnoctites rectirostris	Straight-billed Reedhaunter	Furnariidae	0	0	0	1	9.26298	1.26717	100	19	0.18376	0.00661698	0	1
Limnornis_curvirostris	Limnornis curvirostris	Curve-billed Reedhaunter	Furnariidae	0	0	0	1	14.9901	1.45637	100	14	0.18647	0.00686763	0	1
Lochmias_nematura	Lochmias nematura	Sharp-tailed Streamcreeper	Furnariidae	0	0	0	1	43.8868	1.34242	100	34	0.330487	0.00281278	0	1
Margarornis_bellulus	Margarornis bellulus	Beautiful Treerunner	Furnariidae	0	0	NA	1	29.8141	1.26717	0	59.5	0.316522	0.000493492	0	1
Margarornis_rubiginosus	Margarornis rubiginosus	Ruddy Treerunner	Furnariidae	0	0	NA	1	20.9666	1.25042	0	41.5	0.343102	0.000767785	0	1
Margarornis_squamiger	Margarornis squamiger	Pearled Treerunner	Furnariidae	0	0	0	1	29.7364	1.23805	0	46	0.288439	0.000818145	0	1
Margarornis_stellatus	Margarornis stellatus	Fulvous-dotted Treerunner	Furnariidae	0	0	NA	1	16.4449	1.33244	0	18	0.228678	0.000541889	0	0
Megaxenops_parnaguae	Megaxenops parnaguae	Great Xenops	Furnariidae	0	0	NA	1	36.053	1.39794	0	34.5	0.75524	0.00179566	0	1
Metopothrix_aurantiaca	Metopothrix aurantiaca	Orange-fronted Plushcrown	Furnariidae	0	0	NA	1	8.78158	1.04922	0	79	0.251637	0.00064758	0	0
Ochetorhynchus_andaecola	Ochetorhynchus andaecola	Rock Earthcreeper	Furnariidae	0	0	0	1	15.0833	1.49136	100	5	0.593328	0.00469678	0	0
Ochetorhynchus_melanura	Ochetorhynchus melanura	Crag Chilia	Furnariidae	0	0	0	1	7.11131	1.60206	100	5	0.372754	0.00862635	0	0
Ochetorhynchus_phoenicurus	Ochetorhynchus phoenicurus	Band-tailed Earthcreeper	Furnariidae	0	0	0	1	10.7341	1.48001	100	5	0.259906	0.0088079	0	0
Ochetorhynchus_ruficaudus	Ochetorhynchus ruficaudus	Straight-billed Earthcreeper	Furnariidae	0	0	0	1	6.31175	1.55991	100	5	0.386594	0.00644964	0	0
Oreophylax_moreirae	Oreophylax moreirae	Itatiaia Thistletail	Furnariidae	0	0	0	1	14.7329	1.02119	0	37	0.558505	0.00300146	0	0
Phacellodomus_dorsalis	Phacellodomus dorsalis	Chestnut-backed Thornbird	Furnariidae	0	0	0	1	28.2446	1.5563	0	49	0.29543	0.000816408	0	0
Phacellodomus_erythrophthalmus	Phacellodomus erythrophthalmus	Orange-eyed Thornbird	Furnariidae	0	0	0	1	7.37031	1.38917	0	45	0.254075	0.00325562	0	1
Phacellodomus_ferrugineigula	Phacellodomus ferrugineigula	Orange-breasted Thornbird	Furnariidae	0	0	NA	NA	NA	1.38917	0	NA	NA	NA	NA	0
Phacellodomus_inornatus	Phacellodomus inornatus	Plain Thornbird	Furnariidae	0	0	NA	NA	NA	1.38917	70	NA	NA	NA	NA	NA
Phacellodomus_maculipectus	Phacellodomus maculipectus	Spot-breasted Thornbird	Furnariidae	0	0	NA	NA	NA	1.34044	50	NA	NA	NA	NA	0
Phacellodomus_ruber	Phacellodomus ruber	Greater Thornbird	Furnariidae	0	0	NA	1	27.2607	1.61278	50	42	0.490111	0.00251199	0	1
Phacellodomus_rufifrons	Phacellodomus rufifrons	Rufous-fronted Thornbird	Furnariidae	0	0	0	1	10.7904	1.39094	70	38	0.519401	0.00199083	0	2
Phacellodomus_sibilatrix	Phacellodomus sibilatrix	Little Thornbird	Furnariidae	0	0	0	1	22.2104	1.19033	40	43	0.420418	0.00669207	0	1
Phacellodomus_striaticeps	Phacellodomus striaticeps	Streak-fronted Thornbird	Furnariidae	0	0	0	1	12.2054	1.46389	25	44	0.554085	0.00342131	0	0
Phacellodomus_striaticollis	Phacellodomus striaticollis	Freckle-breasted Thornbird	Furnariidae	0	0	0	1	11.3938	1.40993	70	28	0.280768	0.0067072	0	1
Philydor_atricapillus	Philydor atricapillus	Black-capped Foliage-gleaner	Furnariidae	0	0	NA	1	10.2906	1.34635	0	36.5	0.327264	0.00323375	0	1
Philydor_erythrocercum	Philydor erythrocercum	Rufous-rumped Foliage-gleaner	Furnariidae	0	0	0	1	12.0374	1.40312	0	78	0.328306	0.000824458	0	0
Philydor_erythropterum	Philydor erythropterum	Chestnut-winged Foliage-gleaner	Furnariidae	0	0	NA	1	20.5365	1.47712	0	79	0.284075	0.000700201	0	0
Philydor_fuscipenne	Philydor fuscipenne	Slaty-winged Foliage-gleaner	Furnariidae	0	0	NA	1	12.0134	1.42325	0	28	0.374781	0.00058034	0	0
Philydor_lichtensteini	Philydor lichtensteini	Ochre-breasted Foliage-gleaner	Furnariidae	0	0	NA	1	20.1909	1.32222	0	30	0.447529	0.00293592	0	1
Philydor_novaesi	Philydor novaesi	Alagoas Foliage-gleaner	Furnariidae	0	0	NA	1	13.5612	1.57978	0	12.5	0.380621	0.00171005	0	1
Philydor_pyrrhodes	Philydor pyrrhodes	Cinnamon-rumped Foliage-gleaner	Furnariidae	0	0	NA	1	10.4976	1.4843	0	78	0.301174	0.000788565	0	0
Philydor_ruficaudatum	Philydor ruficaudatum	Rufous-tailed Foliage-gleaner	Furnariidae	0	0	NA	1	16.1248	1.47857	0	77	0.336149	0.000866762	0	0
Philydor_rufum	Philydor rufum	Buff-fronted Foliage-gleaner	Furnariidae	0	0	0	1	13.025	1.39794	0	34	0.416258	0.00219725	0	1
Phleocryptes_melanops	Phleocryptes melanops	Wren-like Rushbird	Furnariidae	0	0	0	1	11.1815	1.16435	100	12	0.379247	0.00705277	1	1
Premnoplex_brunnescens	Premnoplex brunnescens	Spotted Barbtail	Furnariidae	0	0	0	1	28.5883	1.21219	0	56	0.288439	0.000818343	0	2
Premnoplex_tatei	Premnoplex tatei	White-throated Barbtail	Furnariidae	0	0	NA	1	34.9963	1.27875	0	57.5	0.335027	0.000841354	0	0
Premnornis_guttuligera	Premnornis guttuligera	Rusty-winged Barbtail	Furnariidae	0	0	0	1	17.8375	1.2014	0	48.5	0.260995	0.000758936	0	1
Pseudocolaptes_boissonneautii	Pseudocolaptes boissonneautii	Streaked Tuftedcheek	Furnariidae	0	0	0	1	42.2623	1.64246	0	43	0.292122	0.000824971	0	1
Pseudocolaptes_johnsoni	Pseudocolaptes johnsoni	Pacific Tuftedcheek	Furnariidae	0	0	NA	NA	NA	1.69592	0	NA	NA	NA	NA	1
Pseudocolaptes_lawrencii	Pseudocolaptes lawrencii	Buffy Tuftedcheek	Furnariidae	0	0	0	1	40.5067	1.70757	0	17	0.23099	0.000593352	0	0
Pseudoseisura_cristata	Pseudoseisura cristata	Caatinga Cacholote	Furnariidae	0	0	0	1	13.4932	1.69461	100	30	0.726019	0.00184005	0	1
Pseudoseisura_gutturalis	Pseudoseisura gutturalis	White-throated Cacholote	Furnariidae	0	0	0	1	10.7661	1.84757	100	7	0.293866	0.00893654	0	1
Pseudoseisura_lophotes	Pseudoseisura lophotes	Brown Cacholote	Furnariidae	0	0	0	1	14.015	1.85914	100	34.5	0.465826	0.00718539	0	1
Pseudoseisura_unirufa	Pseudoseisura unirufa	Rufous Cacholote	Furnariidae	0	0	0	1	16.3304	1.65225	100	48	0.440489	0.00219962	0	1
Pygarrhichas_albogularis	Pygarrhichas albogularis	White-throated Treerunner	Furnariidae	0	0	0	1	16.3992	1.38021	0	16.5	0.275898	0.00626854	0	1
Roraimia_adusta	Roraimia adusta	Roraiman Barbtail	Furnariidae	0	0	NA	1	20.0767	1.21085	0	79	0.324582	0.000644746	0	1
Schizoeaca_coryi	Schizoeaca coryi	Ochre-browed Thistletail	Furnariidae	0	0	NA	1	13.2166	1.22531	20	19.5	0.338503	0.000674385	0	0
Schizoeaca_fuliginosa	Schizoeaca fuliginosa	White-chinned Thistletail	Furnariidae	0	0	0	1	17.8467	1.26245	0	22	0.244821	0.000620156	0	0
Schizoeaca_griseomurina	Schizoeaca griseomurina	Mouse-coloured Thistletail	Furnariidae	0	0	NA	1	17.3545	1.24551	60	61.5	0.200866	0.000766409	0	0
Schizoeaca_harterti	Schizoeaca harterti	Black-throated Thistletail	Furnariidae	0	0	0	1	10.1582	1.11227	0	62.5	0.332624	0.00254572	0	0
Schizoeaca_helleri	Schizoeaca helleri	Puna Thistletail	Furnariidae	0	0	0	1	17.6906	1.18469	0	77	0.369535	0.00155881	0	0
Schizoeaca_palpebralis	Schizoeaca palpebralis	Eye-ringed Thistletail	Furnariidae	0	0	NA	1	19.1814	1.23045	0	71	0.381279	0.00112936	0	0
Schizoeaca_perijana	Schizoeaca perijana	Perija Thistletail	Furnariidae	0	0	NA	1	10.1787	1.26717	0	29	0.275034	0.000848061	0	0
Schizoeaca_vilcabambae	Schizoeaca vilcabambae	Vilcabamba Thistletail	Furnariidae	0	0	NA	1	16.3596	1.30535	0	70	0.393734	0.0013137	0	0
Schoeniophylax_phryganophilus	Schoeniophylax phryganophilus	Chotoy Spinetail	Furnariidae	0	0	0	1	12.3667	1.26951	60	42	0.405478	0.00474764	0	0
Sclerurus_albigularis	Sclerurus albigularis	Grey-throated Leaftosser	Furnariidae	0	0	0	1	13.7724	1.54158	100	56	0.312545	0.000861699	0	1
Sclerurus_caudacutus	Sclerurus caudacutus	Black-tailed Leaftosser	Furnariidae	0	0	0	1	26.225	1.5555	100	78	0.28695	0.00075238	0	1
Sclerurus_guatemalensis	Sclerurus guatemalensis	Scaly-throated Leaftosser	Furnariidae	0	0	0	1	10.2537	1.54033	80	45	0.309878	0.000847336	0	1
Sclerurus_mexicanus	Sclerurus mexicanus	Tawny-throated Leaftosser	Furnariidae	0	0	0	1	14.9149	1.39967	80	76	0.314699	0.000870393	0	1
Sclerurus_rufigularis	Sclerurus rufigularis	Short-billed Leaftosser	Furnariidae	0	0	NA	1	20.6869	1.33445	100	78	0.27882	0.00078629	0	1
Sclerurus_scansor	Sclerurus scansor	Rufous-breasted Leaftosser	Furnariidae	0	0	0	1	21.1955	1.56703	100	27	0.531503	0.00250421	0	1
Simoxenops_striatus	Simoxenops striatus	Bolivian Recurvebill	Furnariidae	0	0	NA	1	14.9323	1.61909	0	72	0.321541	0.00243087	0	1
Simoxenops_ucayalae	Simoxenops ucayalae	Peruvian Recurvebill	Furnariidae	0	0	NA	1	15.213	1.69723	0	80	0.392639	0.00111819	0	0
Siptornis_striaticollis	Siptornis striaticollis	Spectacled Prickletail	Furnariidae	0	0	0	1	17.0454	1.11394	0	30	0.202797	0.000677741	0	1
Siptornopsis_hypochondriaca	Siptornopsis hypochondriaca	Great Spinetail	Furnariidae	0	0	NA	1	9.47027	1.38917	0	69	0.270718	0.000845732	0	0
Spartonoica_maluroides	Spartonoica maluroides	Bay-capped Wren-spinetail	Furnariidae	0	0	NA	1	17.0932	1.04139	0	20	0.289349	0.00748699	0	1
Sylviorthorhynchus_desmursii	Sylviorthorhynchus desmursii	Des Murs's Wiretail	Furnariidae	0	0	0	1	11.5121	1.03743	0	51.5	0.225959	0.00587558	0	1
Synallaxis_albescens	Synallaxis albescens	Pale-breasted Spinetail	Furnariidae	0	0	0	1	10.3985	1.04922	30	35	0.457709	0.00190548	0	1
Synallaxis_albigularis	Synallaxis albigularis	Dark-breasted Spinetail	Furnariidae	0	0	0	1	13.74	1.18752	30	79	0.177298	0.00068047	0	0
Synallaxis_albilora	Synallaxis albilora	White-lored Spinetail	Furnariidae	0	0	NA	1	21.0265	1.17609	40	64	0.60312	0.00160986	0	1
Synallaxis_azarae	Synallaxis azarae	Azara's Spinetail	Furnariidae	0	0	0	1	19.2721	1.22789	0	27.5	0.330487	0.000997978	0	1
Synallaxis_brachyura	Synallaxis brachyura	Slaty Spinetail	Furnariidae	0	0	0	1	16.982	1.26245	50	37	0.30705	0.000696478	0	1
Synallaxis_cabanisi	Synallaxis cabanisi	Cabanis's Spinetail	Furnariidae	0	0	NA	1	15.6494	1.35603	0	79	0.378298	0.00114618	0	1
Synallaxis_candei	Synallaxis candei	White-whiskered Spinetail	Furnariidae	0	0	0	1	24.9651	1.18469	50	14	0.405946	0.00088151	0	1
Synallaxis_castanea	Synallaxis castanea	Black-throated Spinetail	Furnariidae	0	0	NA	1	4.70437	1.17609	0	42	0.499479	0.000824872	0	0
Synallaxis_cherriei	Synallaxis cherriei	Chestnut-throated Spinetail	Furnariidae	0	0	NA	1	10.1895	1.20412	40	80	0.436904	0.000867801	0	1
Synallaxis_cinerascens	Synallaxis cinerascens	Grey-bellied Spinetail	Furnariidae	0	0	0	1	20.5811	1.11727	50	32	0.31028	0.00385289	0	1
Synallaxis_cinnamomea	Synallaxis cinnamomea	Stripe-breasted Spinetail	Furnariidae	0	0	0	1	16.5493	1.27068	30	26	0.305491	0.000741764	0	0
Synallaxis_courseni	Synallaxis courseni	Apurimac Spinetail	Furnariidae	0	0	NA	1	14.6681	1.22531	0	60	0.429169	0.0015684	0	0
Synallaxis_erythrothorax	Synallaxis erythrothorax	Rufous-breasted Spinetail	Furnariidae	0	0	0	1	9.26157	1.233	0	54	0.347483	0.00265139	0	1
Synallaxis_frontalis	Synallaxis frontalis	Sooty-fronted Spinetail	Furnariidae	0	0	0	1	16.5538	1.14613	20	33	0.539005	0.0022806	0	1
Synallaxis_fuscorufa	Synallaxis fuscorufa	Rusty-headed Spinetail	Furnariidae	0	0	NA	1	12.8363	1.20412	0	14	0.437169	0.000707451	0	0
Synallaxis_gujanensis	Synallaxis gujanensis	Plain-crowned Spinetail	Furnariidae	0	0	0	1	14.4695	1.25768	50	78	0.325247	0.000792293	0	1
Synallaxis_hypospodia	Synallaxis hypospodia	Cinereous-breasted Spinetail	Furnariidae	0	0	NA	1	10.1383	1.22789	0	36	0.693963	0.00151049	0	0
Synallaxis_infuscata	Synallaxis infuscata	Pinto's Spinetail	Furnariidae	0	0	0	1	14.6634	1.26007	0	11	0.372005	0.00207453	0	0
Synallaxis_kollari	Synallaxis kollari	Hoary-throated Spinetail	Furnariidae	0	0	0	1	18.881	1.21696	0	78	0.304501	0.000750138	0	1
Synallaxis_macconnelli	Synallaxis macconnelli	MacConnell's Spinetail	Furnariidae	0	0	NA	1	17.9513	1.29003	0	73	0.298874	0.000850522	0	1
Synallaxis_maranonica	Synallaxis maranonica	Maranon Spinetail	Furnariidae	0	0	NA	1	12.3553	1.11394	50	15	0.280038	0.000748629	0	0
Synallaxis_moesta	Synallaxis moesta	Dusky Spinetail	Furnariidae	0	0	NA	1	16.4652	1.35218	0	78	0.167113	0.000781368	0	1
Synallaxis_propinqua	Synallaxis propinqua	White-bellied Spinetail	Furnariidae	0	0	NA	1	16.0858	1.30103	30	79	0.254724	0.000685046	0	0
Synallaxis_ruficapilla	Synallaxis ruficapilla	Rufous-capped Spinetail	Furnariidae	0	0	0	1	13.1075	1.13988	20	32	0.392844	0.00325005	0	1
Synallaxis_rutilans	Synallaxis rutilans	Ruddy Spinetail	Furnariidae	0	0	NA	1	8.86993	1.22272	50	78	0.315496	0.000810823	0	1
Synallaxis_scutata	Synallaxis scutata	Ochre-cheeked Spinetail	Furnariidae	0	0	NA	1	10.9947	1.18752	100	30.5	0.644076	0.00181345	0	0
Synallaxis_spixi	Synallaxis spixi	Spix's Spinetail	Furnariidae	0	0	0	1	9.45931	1.10037	20	31.5	0.252555	0.00479584	0	1
Synallaxis_stictothorax	Synallaxis stictothorax	Necklaced Spinetail	Furnariidae	0	0	NA	1	32.0492	1.0086	0	8	0.498697	0.0011735	0	0
Synallaxis_subpudica	Synallaxis subpudica	Silvery-throated Spinetail	Furnariidae	0	0	NA	1	17.3927	1.21696	0	22.5	0.194928	0.000576662	0	0
Synallaxis_tithys	Synallaxis tithys	Blackish-headed Spinetail	Furnariidae	0	0	0	1	13.3121	1.19866	50	8	0.637099	0.00146934	0	1
Synallaxis_unirufa	Synallaxis unirufa	Rufous Spinetail	Furnariidae	0	0	0	1	9.19565	1.25285	0	35	0.255993	0.000700597	0	0
Synallaxis_whitneyi	Synallaxis whitneyi	Bahia Spinetail	Furnariidae	0	0	NA	1	21.1328	1.20952	0	44	0.320255	0.00226979	0	1
Synallaxis_zimmeri	Synallaxis zimmeri	Russet-bellied Spinetail	Furnariidae	0	0	0	1	7.59499	1.11394	50	21.5	0.313052	0.000999134	0	0
Syndactyla_dimidiata	Syndactyla dimidiata	Russet-mantled Foliage-gleaner	Furnariidae	0	0	NA	1	18.8006	1.46835	0	28	0.70918	0.00158034	0	1
Syndactyla_guttulata	Syndactyla guttulata	Guttulate Foliage-gleaner	Furnariidae	0	0	0	1	14.8126	1.5563	0	31	0.47146	0.000858591	0	0
Syndactyla_roraimae	Syndactyla roraimae	White-throated Foliage-gleaner	Furnariidae	0	0	NA	1	18.9098	1.44012	0	79	0.270064	0.00071508	0	1
Syndactyla_ruficollis	Syndactyla ruficollis	Rufous-necked Foliage-gleaner	Furnariidae	0	0	NA	1	11.4641	1.49136	0	5	0.474259	0.000958446	0	0
Syndactyla_rufosuperciliata	Syndactyla rufosuperciliata	Buff-browed Foliage-gleaner	Furnariidae	0	0	0	1	21.26	1.40824	20	41	0.259082	0.00495098	0	1
Syndactyla_subalaris	Syndactyla subalaris	Lineated Foliage-gleaner	Furnariidae	0	0	0	1	35.3197	1.4609	0	35.5	0.272175	0.000758086	0	0
Tarphonomus_certhioides	Tarphonomus certhioides	Chaco Earthcreeper	Furnariidae	0	0	0	1	12.4413	1.34439	70	34	0.505313	0.00727225	0	1
Tarphonomus_harterti	Tarphonomus harterti	Bolivian Earthcreeper	Furnariidae	0	0	NA	1	16.9985	1.37931	100	5	0.578712	0.00438693	0	1
Thripadectes_flammulatus	Thripadectes flammulatus	Flammulated Treehunter	Furnariidae	0	0	0	1	31.8755	1.74741	0	18	0.244468	0.000603153	0	0
Thripadectes_holostictus	Thripadectes holostictus	Striped Treehunter	Furnariidae	0	0	NA	1	19.1477	1.60959	60	49.5	0.286807	0.000838894	0	0
Thripadectes_ignobilis	Thripadectes ignobilis	Uniform Treehunter	Furnariidae	0	0	0	1	20.4389	1.67394	0	12	0.237564	0.000572354	0	0
Thripadectes_melanorhynchus	Thripadectes melanorhynchus	Black-billed Treehunter	Furnariidae	0	0	0	1	16.3471	1.6464	0	66	0.248004	0.000802228	0	1
Thripadectes_rufobrunneus	Thripadectes rufobrunneus	Streak-breasted Treehunter	Furnariidae	0	0	0	1	23.2559	1.74974	0	59	0.235681	0.000660847	0	0
Thripadectes_scrutator	Thripadectes scrutator	Buff-throated Treehunter	Furnariidae	0	0	NA	1	35.9223	1.82151	0	73	0.326334	0.00138131	0	1
Thripadectes_virgaticeps	Thripadectes virgaticeps	Streak-capped Treehunter	Furnariidae	0	0	0	1	17.8879	1.81823	0	27	0.243138	0.000613518	0	1
Thripophaga_berlepschi	Thripophaga berlepschi	Russet-mantled Softtail	Furnariidae	0	0	NA	1	10.6996	1.36173	33	76.5	0.244401	0.000855975	0	1
Thripophaga_cherriei	Thripophaga cherriei	Orinoco Softtail	Furnariidae	0	0	NA	1	12.5957	1.21748	20	72	0.318463	0.000471947	0	0
Thripophaga_fusciceps	Thripophaga fusciceps	Plain Softtail	Furnariidae	0	0	NA	1	13.9913	1.4014	30	77	0.371903	0.00107934	0	1
Thripophaga_macroura	Thripophaga macroura	Striated Softtail	Furnariidae	0	0	0	1	32.0835	1.32222	30	33.5	0.296305	0.00257268	0	1
Upucerthia_albigula	Upucerthia albigula	White-throated Earthcreeper	Furnariidae	0	0	0	1	14.9541	1.60097	100	5	0.558358	0.00224178	0	1
Upucerthia_dumetaria	Upucerthia dumetaria	Scale-throated Earthcreeper	Furnariidae	0	0	0	1	13.5998	1.69111	100	7	0.329795	0.00790628	1	0
Upucerthia_jelskii	Upucerthia jelskii	Plain-breasted Earthcreeper	Furnariidae	0	0	0	1	13.5586	1.60314	100	9	0.517024	0.00229226	0	1
Upucerthia_saturatior	Upucerthia saturatior	Patagonian Forest Earthcreeper	Furnariidae	0	0	NA	NA	NA	1.68735	100	NA	NA	NA	NA	1
Upucerthia_serrana	Upucerthia serrana	Striated Earthcreeper	Furnariidae	0	0	0	1	21.0062	1.68753	100	14	0.382681	0.000998522	0	1
Upucerthia_validirostris	Upucerthia validirostris	Buff-breasted Earthcreeper	Furnariidae	0	0	0	1	10.8553	1.52634	100	6	0.506398	0.00724764	0	1
Xenerpestes_minlosi	Xenerpestes minlosi	Double-banded Greytail	Furnariidae	0	0	NA	1	9.23651	1.04139	0	36	0.310881	0.000532796	0	0
Xenerpestes_singularis	Xenerpestes singularis	Equatorial Greytail	Furnariidae	0	0	0	1	21.9292	1.06446	0	10.5	0.332767	0.000685972	0	1
Xenops_milleri	Xenops milleri	Rufous-tailed Xenops	Furnariidae	0	0	NA	1	22.8896	1.08636	0	79	0.257481	0.000718862	0	0
Xenops_minutus	Xenops minutus	Plain Xenops	Furnariidae	0	0	0	1	13.1358	1.02531	0	74	0.333463	0.000917615	0	1
Xenops_rutilans	Xenops rutilans	Streaked Xenops	Furnariidae	0	0	0	1	20.8054	1.066	0	46	0.479015	0.00138164	0	1
Xenops_tenuirostris	Xenops tenuirostris	Slender-billed Xenops	Furnariidae	0	0	NA	1	25.8794	0.986772	0	79	0.315043	0.000775318	0	0
Alopochelidon_fucata	Alopochelidon fucata	Tawny-headed Swallow	Hirundinidae	0	0	NA	1	10.2873	1.14613	0	37	0.420168	0.00456879	1	1
Atticora_fasciata	Atticora fasciata	White-banded Swallow	Hirundinidae	0	0	NA	1	10.4083	1.11394	0	78	0.32073	0.000842892	0	1
Atticora_melanoleuca	Atticora melanoleuca	Black-collared Swallow	Hirundinidae	0	0	NA	1	20.4016	1.03342	0	78	0.395678	0.000846521	0	1
Cheramoeca_leucosterna	Cheramoeca leucosterna	White-backed Swallow	Hirundinidae	0	0	0	1	28.1216	1.14922	0	5	0.386523	0.00885068	0	0
Delichon_dasypus	Delichon dasypus	Asian House-martin	Hirundinidae	0	0	0	1	17.6937	1.25527	0	5	0.496885	0.013869	1	2
Delichon_nipalense	Delichon nipalense	Nepal House-martin	Hirundinidae	0	0	0	1	21.2991	1.17609	0	32	0.565462	0.00833985	0	0
Delichon_urbicum	Delichon urbicum	Northern House-martin	Hirundinidae	0	0	0	1	15.0718	1.16137	0	16	0.233635	0.0191737	2	3
Eurochelidon_sirintarae	Eurochelidon sirintarae	White-eyed River-martin	Hirundinidae	0	0	NA	1	17.1264	1.41497	0	23.5	0.662518	0.00228022	2	1
Haplochelidon_andecola	Haplochelidon andecola	Andean Swallow	Hirundinidae	0	0	NA	1	52.3253	1.23045	10	5	0.558528	0.00238578	0	0
Hirundo_abyssinica	Hirundo abyssinica	Lesser Striped-swallow	Hirundinidae	0	0	0	1	25.1421	1.13033	0	29	0.639809	0.00199949	1	2
Hirundo_aethiopica	Hirundo aethiopica	Ethiopian Swallow	Hirundinidae	0	0	0	1	5.10456	1.12385	0	12	0.711554	0.00252764	0	1
Hirundo_albigularis	Hirundo albigularis	White-throated Swallow	Hirundinidae	0	0	0	1	22.9381	1.33846	20	7	0.593548	0.0060794	1	1
Hirundo_angolensis	Hirundo angolensis	Angola Swallow	Hirundinidae	0	0	0	1	21.4084	1.25042	0	35	0.702668	0.00165408	0	1
Hirundo_ariel	Hirundo ariel	Fairy Martin	Hirundinidae	0	0	0	1	36.7728	1.03543	0	5	0.472892	0.00796175	0	2
Hirundo_atrocaerulea	Hirundo atrocaerulea	Blue Swallow	Hirundinidae	0	0	0	1	21.4783	1.13988	0	37	0.673851	0.00322284	2	2
Hirundo_concolor	Hirundo concolor	Dusky Crag-martin	Hirundinidae	0	0	0	1	16.6036	1.11394	0	13	0.73494	0.00464892	0	1
Hirundo_cucullata	Hirundo cucullata	Greater Striped-swallow	Hirundinidae	0	0	0	1	24.0096	1.43297	0	5	0.586081	0.00618217	1	2
Hirundo_daurica	Hirundo daurica	Red-rumped Swallow	Hirundinidae	0	0	0	1	21.9527	1.34635	0	9	0.520408	0.01232	1	3
Hirundo_dimidiata	Hirundo dimidiata	Pearl-breasted Swallow	Hirundinidae	0	0	0	1	10.2786	1.08279	0	24	0.808244	0.00390421	1	1
Hirundo_domicola	Hirundo domicola	Hill Swallow	Hirundinidae	0	0	NA	NA	NA	1.19312	0	NA	NA	NA	NA	0
Hirundo_fluvicola	Hirundo fluvicola	Streak-throated Swallow	Hirundinidae	0	0	0	1	44.6253	0.986772	0	9	0.700935	0.00818567	1	0
Hirundo_fuliginosa	Hirundo fuliginosa	Forest Swallow	Hirundinidae	0	0	0	1	18.8096	1.0607	0	78	0.425352	0.00103272	0	1
Hirundo_fuligula	Hirundo fuligula	Rock Martin	Hirundinidae	0	0	0	1	16.7113	1.32428	0	5	0.489927	0.00540026	1	1
Hirundo_leucosoma	Hirundo leucosoma	Pied-winged Swallow	Hirundinidae	0	0	0	1	20.2652	1.17609	0	13	0.815578	0.00260935	0	0
Hirundo_lucida	Hirundo lucida	Red-chested Swallow	Hirundinidae	0	0	0	1	12.1859	1.11394	0	15	0.703426	0.00236	0	0
Hirundo_megaensis	Hirundo megaensis	White-tailed Swallow	Hirundinidae	0	0	NA	1	22.5792	1.04139	0	10	0.389924	0.00198293	0	1
Hirundo_neoxena	Hirundo neoxena	Welcome Swallow	Hirundinidae	0	0	0	1	16.4169	1.16732	0	11	0.314278	0.00751524	1	2
Hirundo_nigricans	Hirundo nigricans	Tree Martin	Hirundinidae	0	0	0	1	40.104	1.18752	0	5	0.353946	0.00843565	1	2
Hirundo_nigrita	Hirundo nigrita	White-throated Blue Swallow	Hirundinidae	0	0	0	1	21.6205	1.26245	0	70	0.317089	0.000995766	0	1
Hirundo_nigrorufa	Hirundo nigrorufa	Black-and-rufous Swallow	Hirundinidae	0	0	0	1	25.2736	1.15229	0	52	0.846437	0.00138138	0	1
Hirundo_obsoleta	Hirundo obsoleta	Pale Crag-martin	Hirundinidae	0	0	NA	NA	NA	1.0086	0	NA	NA	NA	NA	1
Hirundo_perdita	Hirundo perdita	Red Sea Swallow	Hirundinidae	0	0	NA	1	27.0775	1.5849	0	0	0.37023	0.00836378	NA	1
Hirundo_preussi	Hirundo preussi	Preuss's Swallow	Hirundinidae	0	0	0	1	23.9381	1.12385	0	16	0.814186	0.00259751	0	1
Hirundo_rufigula	Hirundo rufigula	Red-throated Swallow	Hirundinidae	0	0	0	1	27.5697	1.2014	0	51	0.823643	0.00142521	1	1
Hirundo_rupestris	Hirundo rupestris	Eurasian Crag-martin	Hirundinidae	0	0	0	1	36.517	1.30963	40	5	0.41236	0.0127089	1	2
Hirundo_rustica	Hirundo rustica	Barn Swallow	Hirundinidae	0	0	2	1	15.3746	1.24626	30	9	0.279454	0.0154742	1	3
Hirundo_semirufa	Hirundo semirufa	Rufous-chested Swallow	Hirundinidae	0	0	0	1	17.2404	1.47857	0	32	0.647551	0.00197017	1	1
Hirundo_senegalensis	Hirundo senegalensis	Mosque Swallow	Hirundinidae	0	0	0	1	19.2652	1.65706	0	32	0.706502	0.00214072	0	1
Hirundo_smithii	Hirundo smithii	Wire-tailed Swallow	Hirundinidae	0	0	0	1	21.944	1.09342	0	21	0.734938	0.00269535	1	2
Hirundo_spilodera	Hirundo spilodera	South African Swallow	Hirundinidae	0	0	0	1	33.4297	1.31387	0	5	0.562052	0.00757472	2	2
Hirundo_striolata	Hirundo striolata	Striated Swallow	Hirundinidae	0	0	NA	1	50.689	1.34242	0	45	0.479966	0.00122338	1	NA
Hirundo_tahitica	Hirundo tahitica	Pacific Swallow	Hirundinidae	0	0	0	1	18.4857	1.25042	0	50	0.207474	0.000657576	0	3
Neochelidon_tibialis	Neochelidon tibialis	White-thighed Swallow	Hirundinidae	0	0	NA	1	18.4029	1.02531	0	78	0.301931	0.000773904	0	1
Notiochelidon_flavipes	Notiochelidon flavipes	Pale-footed Swallow	Hirundinidae	0	0	0	1	23.2648	0.991226	0	48.5	0.301873	0.000949405	0	1
Notiochelidon_murina	Notiochelidon murina	Brown-bellied Swallow	Hirundinidae	0	0	NA	1	28.8903	1.06819	0	21	0.331101	0.000845732	0	1
Notiochelidon_pileata	Notiochelidon pileata	Black-capped Swallow	Hirundinidae	0	0	0	1	39.3273	1.08636	0	55	0.433082	0.00183589	0	0
Petrochelidon_fulva	Petrochelidon fulva	Cave Swallow	Hirundinidae	0	0	0	1	24.4519	1.38251	0	7	0.376621	0.00832616	1	3
Petrochelidon_pyrrhonota	Petrochelidon pyrrhonota	Cliff Swallow	Hirundinidae	0	0	0	1	19.0493	1.33445	0	17	0.274051	0.0147547	2	3
Petrochelidon_rufocollaris	Petrochelidon rufocollaris	Chestnut-collared Swallow	Hirundinidae	0	0	NA	1	17.9	1.20412	0	5	0.443645	0.00108478	0	0
Phedina_borbonica	Phedina borbonica	Mascarene Martin	Hirundinidae	0	0	0	1	38.0967	1.34733	0	13	0.613399	0.0032106	1	1
Phedina_brazzae	Phedina brazzae	Brazza's Martin	Hirundinidae	0	0	0	1	35.6101	1.11394	0	39	0.411908	0.0010185	0	1
Progne_chalybea	Progne chalybea	Grey-breasted Martin	Hirundinidae	0	0	0	1	36.8428	1.617	20	52	0.38818	0.00129903	1	2
Progne_cryptoleuca	Progne cryptoleuca	Cuban Martin	Hirundinidae	0	0	NA	1	127.966	1.66276	0	14	0.325297	0.00271714	2	1
Progne_dominicensis	Progne dominicensis	Caribbean Martin	Hirundinidae	0	0	0	1	53.593	1.5977	0	23.5	0.24437	0.00174737	2	1
Progne_elegans	Progne elegans	Southern Martin	Hirundinidae	0	0	NA	1	49.3092	1.70415	0	13	0.381699	0.00842183	2	1
Progne_modesta	Progne modesta	Galapagos Martin	Hirundinidae	0	0	NA	1	59.5804	1.62304	0	5	0.377271	0.00257831	0	1
Progne_murphyi	Progne murphyi	Peruvian Martin	Hirundinidae	0	0	NA	1	96.4697	1.61669	0	5	0.440071	0.00152991	0	1
Progne_sinaloae	Progne sinaloae	Sinaloa Martin	Hirundinidae	0	0	NA	1	81.3449	1.62941	0	42.5	0.714487	0.00494598	2	1
Progne_subis	Progne subis	Purple Martin	Hirundinidae	0	0	2	1	156.266	1.73078	20	25	0.242628	0.0137548	2	3
Progne_tapera	Progne tapera	Brown-chested Martin	Hirundinidae	0	0	0	1	25.3687	1.50515	0	37	0.419123	0.00223519	1	1
Psalidoprocne_albiceps	Psalidoprocne albiceps	White-headed Saw-wing	Hirundinidae	0	0	0	1	74.5484	1.04727	0	31.5	0.684388	0.00173724	1	1
Psalidoprocne_fuliginosa	Psalidoprocne fuliginosa	Cameroon Mountain Saw-wing	Hirundinidae	0	0	0	1	17.0266	1.08636	0	18	0.480996	0.00133086	0	1
Psalidoprocne_nitens	Psalidoprocne nitens	Square-tailed Saw-wing	Hirundinidae	0	0	0	1	18.2852	0.991226	0	77	0.280299	0.00102321	0	1
Psalidoprocne_obscura	Psalidoprocne obscura	Fanti Saw-wing	Hirundinidae	0	0	0	1	32.306	0.973128	0	19	0.517581	0.00188113	0	0
Psalidoprocne_pristoptera	Psalidoprocne pristoptera	Blue Saw-wing	Hirundinidae	0	0	0	1	20.0743	1.01494	0	45	0.563733	0.00158426	0	1
Pseudhirundo_griseopyga	Pseudhirundo griseopyga	Grey-rumped Swallow	Hirundinidae	0	0	0	1	24.0552	1.0086	0	33	0.811469	0.00227172	0	1
Pseudochelidon_eurystomina	Pseudochelidon eurystomina	African River-martin	Hirundinidae	0	0	0	1	17.2899	1.36173	0	77	0.215509	0.000970518	2	1
Pygochelidon_cyanoleuca	Pygochelidon cyanoleuca	Blue-and-white Swallow	Hirundinidae	0	0	0	1	17.7523	0.986772	0	26	0.405515	0.00325977	1	1
Riparia_cincta	Riparia cincta	Banded Martin	Hirundinidae	0	0	0	1	6.79989	1.37014	0	26	0.693068	0.00242704	1	2
Riparia_congica	Riparia congica	Congo Martin	Hirundinidae	0	0	NA	1	5.25901	1.21748	0	67	0.443089	0.00101463	0	0
Riparia_paludicola	Riparia paludicola	Plain Martin	Hirundinidae	0	0	0	1	22.2324	1.13033	0	14	0.71817	0.00397431	0	2
Riparia_riparia	Riparia riparia	Sand Martin	Hirundinidae	0	0	0	1	31.6892	1.10494	0	15	0.25007	0.0189355	2	3
Stelgidopteryx_ruficollis	Stelgidopteryx ruficollis	Southern Rough-winged Swallow	Hirundinidae	0	0	0	1	13.994	1.20683	0	56	0.387262	0.00121084	1	2
Stelgidopteryx_serripennis	Stelgidopteryx serripennis	Northern Rough-winged Swallow	Hirundinidae	0	0	0	1	15.3786	1.20016	30	19	0.280947	0.0134198	1	2
Tachycineta_albilinea	Tachycineta albilinea	Mangrove Swallow	Hirundinidae	0	0	0	1	10.3747	1.22272	0	47	0.391545	0.00220822	0	1
Tachycineta_albiventer	Tachycineta albiventer	White-winged Swallow	Hirundinidae	0	0	0	1	18.7696	1.24797	0	62	0.398275	0.00111071	1	1
Tachycineta_bicolor	Tachycineta bicolor	Tree Swallow	Hirundinidae	0	0	2	1	9.15779	1.32634	20	32	0.247301	0.0171975	1	3
Tachycineta_cyaneoviridis	Tachycineta cyaneoviridis	Bahama Swallow	Hirundinidae	0	0	0	1	11.661	1.24304	0	20	0.308484	0.00374654	1	1
Tachycineta_euchrysea	Tachycineta euchrysea	Golden Swallow	Hirundinidae	0	0	NA	1	52.4288	1.2307	0	24	0.245622	0.00184661	0	1
Tachycineta_leucorrhoa	Tachycineta leucorrhoa	White-rumped Swallow	Hirundinidae	0	0	NA	1	11.8453	1.18469	0	37	0.451537	0.00394051	1	1
Tachycineta_meyeni	Tachycineta meyeni	Chilean Swallow	Hirundinidae	0	0	NA	1	33.0786	1.17319	0	6	0.270145	0.00710212	1	0
Tachycineta_stolzmanni	Tachycineta stolzmanni	Tumbes Swallow	Hirundinidae	0	0	NA	1	20.1894	1.05308	0	5	0.462732	0.00162371	0	1
Tachycineta_thalassina	Tachycineta thalassina	Violet-green Swallow	Hirundinidae	0	0	0	1	18.3715	1.15076	20	9	0.309747	0.0131937	1	2
Agelaioides_badius	Agelaioides badius	Bay-winged Cowbird	Icteridae	0	0	0	1	11.4687	1.6561	50	29	0.42249	0.00587079	0	2
Agelaius_assimilis	Agelaius assimilis	Red-shouldered Blackbird	Icteridae	0	0	0	1	9.46086	1.68215	100	12	0.330117	0.00303787	0	1
Agelaius_humeralis	Agelaius humeralis	Tawny-shouldered Blackbird	Icteridae	0	0	0	1	21.3885	1.5605	60	14	0.325297	0.00271714	0	1
Agelaius_phoeniceus	Agelaius phoeniceus	Red-winged Blackbird	Icteridae	0	0	3	1	194.469	1.71933	90	25	0.261651	0.0142623	1	3
Agelaius_tricolor	Agelaius tricolor	Tricoloured Blackbird	Icteridae	0	0	3	1	141.271	1.76864	100	9	0.651501	0.00876741	1	2
Agelaius_xanthomus	Agelaius xanthomus	Yellow-shouldered Blackbird	Icteridae	0	0	0	1	7.50848	1.58433	20	24	0.209882	0.00165418	0	2
Agelasticus_cyanopus	Agelasticus cyanopus	Unicoloured Blackbird	Icteridae	0	0	0	1	162.183	1.57519	70	41	0.434407	0.00280454	0	0
Agelasticus_thilius	Agelasticus thilius	Yellow-winged Blackbird	Icteridae	0	0	0	1	185.529	1.50106	70	14	0.327864	0.00766323	1	1
Agelasticus_xanthophthalmus	Agelasticus xanthophthalmus	Pale-eyed Blackbird	Icteridae	0	0	0	1	8.38668	1.65418	70	80	0.229568	0.000829668	0	0
Amblycercus_holosericeus	Amblycercus holosericeus	Yellow-billed Cacique	Icteridae	0	0	0	1	11.7561	1.85592	0	48	0.336895	0.00123328	0	1
Amblyramphus_holosericeus	Amblyramphus holosericeus	Scarlet-headed Blackbird	Icteridae	0	0	0	1	8.08843	1.79024	100	41.5	0.304625	0.00624251	0	1
Cacicus_cela	Cacicus cela	Yellow-rumped Cacique	Icteridae	0	0	3	0	5.79197	1.94176	0	75	0.375445	0.000922639	0	2
Cacicus_chrysonotus	Cacicus chrysonotus	Mountain Cacique	Icteridae	0	0	NA	1	8.37859	1.90037	0	65	0.332624	0.00202511	0	0
Cacicus_chrysopterus	Cacicus chrysopterus	Golden-winged Cacique	Icteridae	0	0	0	1	7.80124	1.5617	0	43	0.265821	0.00536773	0	1
Cacicus_haemorrhous	Cacicus haemorrhous	Red-rumped Cacique	Icteridae	0	0	3	0	6.57827	1.9312	0	75	0.338683	0.000993493	0	1
Cacicus_koepckeae	Cacicus koepckeae	Selva Cacique	Icteridae	0	0	0	1	5.15642	1.80434	0	80	0.390719	0.000957938	0	1
Cacicus_leucoramphus	Cacicus leucoramphus	Northern Mountain Cacique	Icteridae	0	0	NA	1	20.9031	1.90982	0	37	0.236565	0.000602238	0	NA
Cacicus_melanicterus	Cacicus melanicterus	Yellow-winged Cacique	Icteridae	0	0	2	1	60.8195	1.9154	0	38	0.752772	0.00250964	0	0
Cacicus_microrhynchus	Cacicus microrhynchus	Scarlet-rumped Cacique	Icteridae	0	0	NA	NA	NA	1.80434	0	NA	NA	NA	NA	NA
Cacicus_sclateri	Cacicus sclateri	Ecuadorian Cacique	Icteridae	0	0	0	1	12.7925	1.6902	0	79	0.141739	0.000750964	0	1
Cacicus_solitarius	Cacicus solitarius	Solitary Black Cacique	Icteridae	0	0	0	1	20.4265	1.90336	0	55	0.440144	0.00128098	0	1
Cacicus_uropygialis	Cacicus uropygialis	Scarlet-rumped Cacique	Icteridae	0	0	NA	1	6.5634	1.78993	0	49	0.274146	0.000692351	0	1
Chrysomus_icterocephalus	Chrysomus icterocephalus	Yellow-hooded Blackbird	Icteridae	0	0	3	1	114.237	1.49136	90	35	0.351331	0.000858127	0	0
Chrysomus_ruficapillus	Chrysomus ruficapillus	Chestnut-capped Blackbird	Icteridae	0	0	3	0	57.5353	1.56526	90	33	0.470008	0.00282855	0	1
Clypicterus_oseryi	Clypicterus oseryi	Casqued Oropendola	Icteridae	0	0	3	1	24.7827	2.16107	0	80	0.160174	0.000720022	0	1
Curaeus_curaeus	Curaeus curaeus	Austral Blackbird	Icteridae	0	0	0	1	8.37676	1.92273	50	13	0.242064	0.00608093	0	1
Curaeus_forbesi	Curaeus forbesi	Forbes's Blackbird	Icteridae	0	0	0	1	14.3195	1.69897	30	23	0.528021	0.00201831	0	1
Dives_atroviolaceus	Dives atroviolaceus	Cuban Blackbird	Icteridae	0	0	0	1	10.6715	1.9235	40	14	0.325297	0.00271714	0	0
Dives_dives	Dives dives	Melodious Blackbird	Icteridae	0	0	0	1	20.7182	1.96237	80	50	0.362015	0.00247942	0	1
Dives_warszewiczi	Dives warszewiczi	Scrub Blackbird	Icteridae	0	0	0	1	13.137	1.8651	70	5	0.440043	0.00112936	0	1
Carduelis_lawrencei	Carduelis lawrencei	Lawrence's Goldfinch	Fringillidae	1	1	0	1	73.0229	1.03941	60	10	0.66014	0.00865927	1	2
Euphagus_carolinus	Euphagus carolinus	Rusty Blackbird	Icteridae	0	0	0	1	61.7027	1.77634	70	33	0.252011	0.0205371	2	2
Euphagus_cyanocephalus	Euphagus cyanocephalus	Brewer's Blackbird	Icteridae	0	0	3	1	113.493	1.79692	100	10.5	0.285315	0.0145571	1	2
Gnorimopsar_chopi	Gnorimopsar chopi	Chopi Blackbird	Icteridae	0	0	0	1	23.4091	1.81889	60	35	0.47062	0.00239979	0	1
Gymnomystax_mexicanus	Gymnomystax mexicanus	Oriole Blackbird	Icteridae	0	0	0	1	3.33056	1.99123	60	61	0.342857	0.000906853	0	1
Hypopyrrhus_pyrohypogaster	Hypopyrrhus pyrohypogaster	Red-bellied Grackle	Icteridae	0	0	0	1	13.2554	2	0	52	0.208875	0.000604433	0	1
Icterus_abeillei	Icterus abeillei	Black-backed Oriole	Icteridae	0	0	NA	1	185.474	1.51851	30	14.5	0.627631	0.00402133	2	1
Icterus_auratus	Icterus auratus	Orange Oriole	Icteridae	0	0	0	1	57.6854	1.50651	0	63	0.343485	0.00281961	0	1
Icterus_auricapillus	Icterus auricapillus	Orange-crowned Oriole	Icteridae	0	0	NA	1	5.34214	1.50786	0	25	0.391432	0.000761248	0	0
Icterus_bonana	Icterus bonana	Martinique Oriole	Icteridae	0	0	0	1	10.6261	1.4624	0	68	0.24933	0.00130971	0	1
Icterus_bullockii	Icterus bullockii	Bullock's Oriole	Icteridae	0	0	1	1	155.302	1.57864	30	5	0.335611	0.0130989	2	2
Icterus_cayanensis	Icterus cayanensis	Epaulet Oriole	Icteridae	0	0	0	1	14.1047	1.5563	0	55	0.397674	0.00135123	0	1
Icterus_chrysater	Icterus chrysater	Yellow-backed Oriole	Icteridae	0	0	0	1	33.6744	1.72754	0	36	0.311427	0.000745201	0	1
Icterus_croconotus	Icterus croconotus	Orange-backed Troupial	Icteridae	0	0	0	1	8.77039	1.64836	0	76	0.361978	0.00095764	0	1
Icterus_cucullatus	Icterus cucullatus	Hooded Oriole	Icteridae	0	0	0	1	164.982	1.38561	0	8	0.438472	0.00916621	1	2
Icterus_dominicensis	Icterus dominicensis	Greater Antillean Oriole	Icteridae	0	0	0	1	6.26568	1.55328	0	18	0.298148	0.00227907	0	1
Icterus_galbula	Icterus galbula	Baltimore Oriole	Icteridae	0	0	0	1	163.161	1.51654	30	30	0.204379	0.015677	2	3
Icterus_graceannae	Icterus graceannae	White-edged Oriole	Icteridae	0	0	0	1	13.1915	1.61805	0	5	0.485786	0.00144404	0	1
Icterus_graduacauda	Icterus graduacauda	Audubon's Oriole	Icteridae	0	0	0	1	35.0703	1.62531	20	25	0.44553	0.00435475	0	1
Icterus_gularis	Icterus gularis	Altamira Oriole	Icteridae	0	0	0	1	4.17373	1.74273	0	35	0.379288	0.00282856	0	1
Icterus_icterus	Icterus icterus	Venezuelan Troupial	Icteridae	0	0	0	1	19.365	1.79704	20	55	0.431747	0.00123885	0	1
Icterus_jamacaii	Icterus jamacaii	Campo Troupial	Icteridae	0	0	0	1	16.9399	1.79865	20	28	0.684466	0.00170281	0	1
Icterus_laudabilis	Icterus laudabilis	St Lucia Oriole	Icteridae	0	0	0	1	12.5344	1.56703	0	68	0.243501	0.00131996	0	1
Icterus_leucopteryx	Icterus leucopteryx	Jamaican Oriole	Icteridae	0	0	0	1	13.177	1.56703	0	29	0.261546	0.00158112	0	1
Icterus_maculialatus	Icterus maculialatus	Bar-winged Oriole	Icteridae	0	0	NA	1	99.5244	1.57287	0	52	0.478597	0.00197208	0	0
Icterus_mesomelas	Icterus mesomelas	Yellow-tailed Oriole	Icteridae	0	0	0	1	10.2308	1.60097	0	35	0.326672	0.00103872	0	1
Icterus_nigrogularis	Icterus nigrogularis	Yellow Oriole	Icteridae	0	0	0	1	8.03151	1.60423	0	28	0.422646	0.00090438	0	1
Icterus_oberi	Icterus oberi	Montserrat Oriole	Icteridae	0	0	0	1	191.279	1.55449	0	0	0.22893	0.00173495	0	1
Icterus_parisorum	Icterus parisorum	Scott's Oriole	Icteridae	0	0	0	1	64.1024	1.55859	20	5	0.462658	0.00899876	0	2
Icterus_pectoralis	Icterus pectoralis	Spot-breasted Oriole	Icteridae	0	0	0	1	12.0697	1.66745	0	41	0.614659	0.00138701	0	1
Icterus_prosthemelas	Icterus prosthemelas	Black-cowled Oriole	Icteridae	0	0	0	1	105.57	1.44716	0	65	0.31724	0.00253223	0	0
Icterus_pustulatus	Icterus pustulatus	Streak-backed Oriole	Icteridae	0	0	1	1	50.9732	1.56805	0	36	0.720578	0.00240109	0	2
Icterus_spurius	Icterus spurius	Orchard Oriole	Icteridae	0	0	0	1	194.904	1.28892	30	14	0.249102	0.0133235	2	2
Icterus_wagleri	Icterus wagleri	Black-vented Oriole	Icteridae	0	0	0	1	10.6712	1.62118	0	34	0.637943	0.0033117	0	1
Lampropsar_tanagrinus	Lampropsar tanagrinus	Velvet-fronted Grackle	Icteridae	0	0	0	1	7.94279	1.75815	30	78	0.307655	0.000693036	0	1
Macroagelaius_imthurni	Macroagelaius imthurni	Golden-tufted Grackle	Icteridae	0	0	0	1	18.2919	1.89182	0	74.5	0.345933	0.000712968	0	0
Macroagelaius_subalaris	Macroagelaius subalaris	Mountain Grackle	Icteridae	0	0	0	1	13.6454	2.06911	0	16	0.20509	0.000520493	0	1
Molothrus_aeneus	Molothrus aeneus	Bronzed Cowbird	Icteridae	0	0	3	0	23.7403	1.79865	80	24	0.467042	0.00415282	1	2
Molothrus_armenti	Molothrus armenti	Bronze-brown Cowbird	Icteridae	0	0	NA	0	12.7823	1.55328	100	12	0.568665	0.000590234	0	NA
Molothrus_ater	Molothrus ater	Brown-headed Cowbird	Icteridae	0	0	2	0	120.812	1.62481	80	16	0.271001	0.0139002	1	3
Molothrus_bonariensis	Molothrus bonariensis	Shiny Cowbird	Icteridae	0	0	2	0	100.643	1.58005	100	43	0.382853	0.00158189	0	3
Molothrus_oryzivorus	Molothrus oryzivorus	Giant Cowbird	Icteridae	0	0	3	0	23.7771	2.26482	40	71	0.36535	0.000985425	0	1
Molothrus_rufoaxillaris	Molothrus rufoaxillaris	Screaming Cowbird	Icteridae	0	0	0	0	38.0795	1.73239	90	29	0.358173	0.00650357	0	2
Nesopsar_nigerrimus	Nesopsar nigerrimus	Jamaican Blackbird	Icteridae	0	0	0	1	8.37676	1.59106	0	29	0.261546	0.00158112	0	1
Ocyalus_latirostris	Ocyalus latirostris	Band-tailed Oropendola	Icteridae	0	0	2	0	19.2839	1.989	0	80	0.170594	0.000620585	0	0
Oreopsar_bolivianus	Oreopsar bolivianus	Bolivian Blackbird	Icteridae	0	0	0	1	10.8197	1.86303	60	22.5	0.464664	0.00299962	0	0
Psarocolius_angustifrons	Psarocolius angustifrons	Russet-backed Oropendola	Icteridae	0	0	3	0	41.4005	2.39358	0	78	0.210493	0.000690744	0	1
Psarocolius_atrovirens	Psarocolius atrovirens	Dusky-green Oropendola	Icteridae	0	0	3	0	17.1634	2.18184	40	56	0.34434	0.00170889	0	1
Psarocolius_bifasciatus	Psarocolius bifasciatus	Olive Oropendola	Icteridae	0	0	NA	0	18.5476	2.5563	0	79	0.331609	0.000784806	0	0
Psarocolius_cassini	Psarocolius cassini	Baudo Oropendola	Icteridae	0	0	NA	0	35.9613	2.58417	40	62	0.205897	0.000498977	1	1
Psarocolius_decumanus	Psarocolius decumanus	Crested Oropendola	Icteridae	0	0	3	0	32.9824	2.33445	10	70	0.374878	0.00103527	0	1
Psarocolius_guatimozinus	Psarocolius guatimozinus	Black Oropendola	Icteridae	0	0	3	0	32.9447	2.60779	0	34	0.296892	0.000563486	0	0
Psarocolius_montezuma	Psarocolius montezuma	Montezuma Oropendola	Icteridae	0	0	3	0	40.6095	2.51188	0	62	0.334885	0.00243486	0	2
Psarocolius_viridis	Psarocolius viridis	Green Oropendola	Icteridae	0	0	3	0	27.4542	2.47567	0	78	0.287002	0.000777468	0	1
Psarocolius_wagleri	Psarocolius wagleri	Chestnut-headed Oropendola	Icteridae	0	0	3	0	28.8265	2.21352	0	56	0.308928	0.000942064	0	1
Pseudoleistes_guirahuro	Pseudoleistes guirahuro	Yellow-rumped Marshbird	Icteridae	0	0	0	1	8.09594	1.93727	100	30.5	0.325924	0.0040837	0	1
Pseudoleistes_virescens	Pseudoleistes virescens	Brown-and-yellow Marshbird	Icteridae	0	0	0	1	22.3794	1.90282	100	15	0.288302	0.00773091	0	2
Quiscalus_lugubris	Quiscalus lugubris	Carib Grackle	Icteridae	0	0	2	1	54.2055	1.8038	100	24	0.479904	0.00102195	0	2
Quiscalus_major	Quiscalus major	Boat-tailed Grackle	Icteridae	0	0	3	0	131.622	2.20003	70	28	0.272527	0.00713911	0	3
Quiscalus_mexicanus	Quiscalus mexicanus	Great-tailed Grackle	Icteridae	0	0	3	0	104.648	2.22789	80	9	0.382425	0.0100454	1	3
Quiscalus_nicaraguensis	Quiscalus nicaraguensis	Nicaraguan Grackle	Icteridae	0	0	2	1	130.86	1.81889	90	55	0.431627	0.000775201	0	0
Quiscalus_niger	Quiscalus niger	Greater Antillean Grackle	Icteridae	0	0	0	1	34.0932	1.87292	80	18	0.284712	0.00221995	0	1
Quiscalus_quiscula	Quiscalus quiscula	Common Grackle	Icteridae	0	0	2	1	46.9686	2.02572	70	34	0.24309	0.0155132	1	3
Sturnella_bellicosa	Sturnella bellicosa	Peruvian Meadowlark	Icteridae	0	0	2	1	89.0444	1.76343	80	5	0.436915	0.00133296	0	1
Sturnella_defilippii	Sturnella defilippii	Pampas Meadowlark	Icteridae	0	0	2	1	108.347	1.8293	90	70	0.356178	0.000830148	0	1
Sturnella_loyca	Sturnella loyca	Long-tailed Meadowlark	Icteridae	0	0	1	1	98.8323	2.05308	70	6	0.289309	0.00846387	0	2
Sturnella_magna	Sturnella magna	Eastern Meadowlark	Icteridae	0	0	2	1	22.9107	1.95535	100	32	0.267485	0.0114898	1	3
Sturnella_militaris	Sturnella militaris	Red-breasted Blackbird	Icteridae	0	0	3	1	164.007	1.61119	90	11	0.296139	0.00887631	0	1
Sturnella_neglecta	Sturnella neglecta	Western Meadowlark	Icteridae	0	0	2	1	14.0838	2.00303	100	6	0.317545	0.0142723	1	3
Sturnella_superciliaris	Sturnella superciliaris	White-browed Blackbird	Icteridae	0	0	3	1	147.33	1.66039	90	36	0.415804	0.00380446	0	1
Xanthocephalus_xanthocephalus	Xanthocephalus xanthocephalus	Yellow-headed Blackbird	Icteridae	0	0	3	1	96.1489	1.80956	90	6	0.29072	0.0152975	1	3
Xanthopsar_flavus	Xanthopsar flavus	Saffron-cowled Blackbird	Icteridae	0	0	0	1	91.7222	1.63347	70	39	0.21446	0.00665116	0	1
Irena_cyanogastra	Irena cyanogastra	Philippine Fairy-bluebird	Irenidae	0	0	NA	1	84.2529	1.90472	0	27.5	0.260773	0.00108995	0	0
Irena_puella	Irena puella	Asian Fairy-bluebird	Irenidae	0	0	0	1	113.379	1.81224	0	38	0.387453	0.000924206	0	2
Corvinella_corvina	Corvinella corvina	Yellow-billed Shrike	Laniidae	0	0	0	1	8.90594	1.81558	100	17	0.851958	0.00270654	0	1
Eurocephalus_anguitimens	Eurocephalus anguitimens	White-crowned Shrike	Laniidae	0	0	0	1	17.0673	1.83916	100	16	0.79972	0.00461005	0	1
Eurocephalus_rueppelli	Eurocephalus rueppelli	White-rumped Shrike	Laniidae	0	0	0	1	27.6957	1.70458	60	9	0.531453	0.00177693	0	0
Lanius_bucephalus	Lanius bucephalus	Bull-headed Shrike	Laniidae	0	0	0	1	47.2899	1.59934	100	21	0.493334	0.0178954	1	2
Lanius_cabanisi	Lanius cabanisi	Long-tailed Fiscal	Laniidae	0	0	0	1	15.9583	1.86864	50	14	0.550709	0.00183918	0	1
Lanius_collaris	Lanius collaris	Common Fiscal	Laniidae	0	0	0	1	17.8384	1.58328	80	26	0.665071	0.00237343	0	3
Lanius_collurio	Lanius collurio	Red-backed Shrike	Laniidae	0	0	1	1	48.0908	1.45408	50	17	0.191106	0.0153876	2	3
Lanius_collurioides	Lanius collurioides	Burmese Shrike	Laniidae	0	0	0	1	39.267	1.41497	100	34	0.590684	0.00489475	1	1
Lanius_cristatus	Lanius cristatus	Brown Shrike	Laniidae	0	0	0	1	33.3942	1.50604	80	18	0.367958	0.0233746	1	3
Lanius_dorsalis	Lanius dorsalis	Taita Fiscal	Laniidae	0	0	0	1	7.92587	1.6981	70	7	0.528601	0.00170878	0	1
Lanius_excubitor	Lanius excubitor	Great Grey Shrike	Laniidae	0	0	1	1	6.83028	1.79616	100	26	0.239522	0.0218241	1	3
Lanius_excubitoroides	Lanius excubitoroides	Grey-backed Fiscal	Laniidae	0	0	0	1	20.2233	1.73038	80	12	0.783105	0.00286751	0	1
Lanius_gubernator	Lanius gubernator	Emin's Shrike	Laniidae	0	0	0	1	51.3015	1.37107	40	29	0.736287	0.00248182	0	0
Lanius_isabellinus	Lanius isabellinus	Rufous-tailed Shrike	Laniidae	0	0	0	1	26.4414	1.4014	70	5	0.42785	0.0180186	2	3
[truncated: 3,902 more rows]
